# Supplementary material
Source: publisher figshare collection journal article supplement (https://gsajournals.figshare.com/articles/dataset/_/11516508)
Supplement: Supplementary file 1 [file 1]

## Sheet: Table S3
ORF	N_FC_Strains	mean_FoldChangeExpression	median_FoldChangeExpression	p
YAL001C	10	0.065525009946657	0.0865838553633267	0.0465039817472192
YAL002W	10	0.0427605642176198	0.0320543301981043	0.165164180526736
YAL003W	10	0.0570216260416553	0.0656300928325002	0.261615966699314
YAL004W	10	0	0	NaN
YAL005C	10	-0.181184949797858	0.0141111968485803	0.33035569665622
YAL007C	10	0.0352021459733734	0.0458082723365776	0.310283861759167
YAL008W	10	-0.29572623404007	-0.170224175802515	0.0364694182052093
YAL009W	10	0.0534260113113806	0.0405485839137429	0.0709505138236507
YAL010C	10	0.113696508854669	0.0786850506747548	0.0196327387823496
YAL011W	10	0.0356397502796974	-0.0181260302531824	0.50437703142329
YAL012W	10	0.219164978687239	0.227598734706226	0.000414602319591813
YAL013W	10	0.146679874798972	0.157304743428334	0.000185115217696545
YAL014C	10	0.0920245501803316	0.120770639684254	0.00850202967177409
YAL015C	10	0.00793411256234245	0.0203322067611912	0.815132664520994
YAL016C-A	10	-0.200191626928453	-0.239223471512333	0.0050456204976733
YAL016C-B	10	0.0898216357396212	0.18907122498069	0.658920250022413
YAL016W	10	0.0707085649020262	0.0498361843727132	0.019703444257476
YAL017W	10	-0.132619012780325	-0.0528449977552051	0.201332039590623
YAL018C	10	-0.388824750178775	-0.438321118072534	0.000832973063190683
YAL019W	10	0.128459738050163	0.0452671094232581	0.229570907065642
YAL019W-A	10	0.10380635333863	0.033931360890223	0.320336402893013
YAL020C	10	0.295811725491526	0.305257743057474	0.0121769887064148
YAL021C	10	0.117853612619457	0.137123211732479	0.0235741324487351
YAL022C	10	0.104254619594163	0.0508106645774168	0.0442027831525186
YAL023C	10	0.0400022160840243	0.0127390459065196	0.265753151000278
YAL024C	10	0.0847199908468647	0.00990965439696032	0.389238541585277
YAL025C	10	0.245228377465537	0.0564077847233311	0.198491660540784
YAL026C	10	0.0102656085845526	-0.00654802829167431	0.767665419992978
YAL026C-A	10	0.129160129455048	0.17214337436735	0.112437388352719
YAL027W	10	0.0723076658592929	0.0367046524506429	0.182545145914181
YAL028W	10	-0.136352104872131	-2.21407577482352e-05	0.304330109635841
YAL029C	10	0.0643671143017454	0.00784066851586896	0.346472222246601
YAL030W	10	-0.0170020953169471	-0.000139479044550915	0.715634377462912
YAL031C	10	-0.0166665042594294	-1.02886409284637e-05	0.666195467534622
YAL031W-A	10	-0.0975283602353697	-0.0326764496321943	0.381232675897267
YAL032C	10	0.0129672181416811	0.0173910634730204	0.761838618269518
YAL033W	10	0.0355536204590541	0.0453920262061265	0.525924787110919
YAL034C	10	-0.134726057840051	-0.0140681632856117	0.234923216667986
YAL034C-B	10	0.235298006860054	0.0987515804035317	0.154684653864631
YAL034W-A	10	0.0511745970927916	0.041907762860454	0.411707088320506
YAL035W	10	0.0153915587810982	0.0293999457411792	0.795800682692465
YAL036C	10	0.0752842601317059	0.0195684104584092	0.278332361022582
YAL037C-A	10	0.290758433629327	0.321951460996322	0.129496908451426
YAL037C-B	10	0.0622744316259542	0.0673206802952122	0.347963523096015
YAL037W	10	0.113173184592479	0.0985266092310679	0.178285908359077
YAL038W	10	0.0181696084087006	0.0271267064336774	0.630722300594905
YAL039C	10	0.188073838728164	0.2072400685775	0.0387408706437667
YAL040C	10	0.134162516031287	0.0543799654284377	0.198413286557918
YAL041W	10	0.117117218249101	0.0903104854552505	0.0432811810006613
YAL042C-A	10	-0.0177053445371417	0.000322135562914157	0.734193197148046
YAL042W	10	0.0984723662103526	0.119107113763906	0.0168340730048679
YAL043C	10	0.089307824880806	0.018481687431022	0.172593188737254
YAL044C	10	0.0426372454038484	0.029286052329928	0.678640360952807
YAL044W-A	10	0.00477476117101131	0.00136972664446065	0.920841397940134
YAL045C	10	-0.0917435306523748	-0.0565799437283668	0.0287919516463841
YAL046C	10	0.0589422544209549	-3.87101475512498e-05	0.407542128803363
YAL047C	10	0.0775238507333931	0.00409763221127597	0.204470858630639
YAL047W-A	10	-0.247126273342277	-0.284185280562844	0.255010820764109
YAL048C	10	0.00881872483970987	0.0114607402833817	0.817770750174973
YAL049C	10	-0.0377242541527437	0.00102169351278904	0.229185369317567
YAL051W	10	0.0896984085009756	0.105954588414375	0.0340950778977455
YAL053W	10	0.170114958714827	0.127891817223991	0.0914048575593603
YAL054C	10	0.110949805651685	0.0855891373554539	0.0309456506827444
YAL055W	10	-0.0549664953251393	-0.0414196344707228	0.375914726626698
YAL056C-A	10	0.0739432035688515	0.028887532305714	0.168065407052367
YAL056W	10	0.0576326683170127	0.0273267825425661	0.0398259225944602
YAL058W	10	-0.00906253919568228	-0.00756219396035001	0.882217191907722
YAL059C-A	10	0.312897799960205	0.0552912441673283	0.375554261463704
YAL059W	10	0.198032834761962	-0.00473209514214441	0.282850413886437
YAL060W	10	-0.218202296122504	-0.124622949669174	0.137436546619353
YAL061W	10	0.0124175801031562	0.0232483563072256	0.850208388199284
YAL062W	10	0.10042317100766	0.0812246862215508	0.0296699812374692
YAL063C	10	0.050463702903103	0.0107486486664581	0.381434603540665
YAL063C-A	10	-0.340783341398492	-0.063384873176684	0.0958117716291885
YAL064C-A	10	0.14270877735786	0.15180849474533	0.0430274306473675
YAL064W	10	-0.0024661170305054	0.0908544313816647	0.980340382421883
YAL064W-B	10	-0.083714647074592	-4.74423288678999e-05	0.501525606513173
YAL065C	10	-0.0449428714302473	-0.0275403445012372	0.738078632202608
YAL066W	10	0.213988977455647	0.138220485294017	0.125338595699427
YAL067C	10	0.0896589695921558	0.0215593555165929	0.155225683663595
YAL067W-A	10	-0.229303158397058	-0.108822781184719	0.319406794853356
YAL068C	10	0.0954693224806398	0.0888843931150529	0.413293331590477
YAL068W-A	10	-0.35925645854702	-0.354080506869025	0.48401487778443
YAL069W	10	0.189775525142281	0.0904102142733168	0.133349026224472
YAR002C-A	10	0.0264454769967636	-0.012052576444891	0.606374326043719
YAR002W	10	0.043263138667549	0.011741656548704	0.610245054264283
YAR003W	10	0.107043289505179	0.0134286963560243	0.195091805100927
YAR007C	10	0.0598792255041728	-0.0143084462331205	0.300319346920392
YAR008W	10	0.141364069237887	0.0129259095242362	0.272423947424745
YAR014C	10	0.0869989239885218	-0.0133871139629696	0.335166843860906
YAR015W	10	0.647629627632656	0.894537323204931	0.0162508326711213
YAR018C	10	0.0814532699074548	-0.0181446632481754	0.43366255013112
YAR019C	10	0.0271518435032674	0.0403939070398242	0.559385641797098
YAR019W-A	10	-0.195272460479633	-0.128602581964006	0.187072956533104
YAR020C	10	0.121877228022912	0.153344222989736	0.0976715055797974
YAR023C	10	0.0623836557736025	0.0491311023916618	0.343294278854433
YAR027W	10	-0.00258828424558937	0.0728429364966121	0.9832661569912
YAR028W	10	-0.0227879407971618	0.00707763054996672	0.795054646524224
YAR029W	10	-0.0601122311805523	-0.0317012564908063	0.644046627880676
YAR030C	10	0.139736929755081	0.144851013893667	0.0971355033285946
YAR031W	10	0.0838059502424387	0.100064594003567	0.127983807761903
YAR033W	10	0.149869509871949	0.152865809910323	0.0201198768262347
YAR035C-A	10	1.46452289088276	1.57805963739454	2.10581694466698e-05
YAR035W	10	0.198210328292092	0.232139023226379	0.01122294393776
YAR042W	10	0.177462757050065	0.17823184174159	0.000426911754193239
YAR047C	10	0.12446545438227	0.137143117157798	0.355691155318336
YAR050W	10	0.196310630452902	0.17158003783778	0.00705125814582475
YAR053W	10	-0.15489456775821	-0.0677451628836121	0.118786112750628
YAR060C	10	0.141058312105937	0.155084587469175	0.0112541252849085
YAR064W	10	0.0485815917700868	-0.00016343195593764	0.463494480668379
YAR066W	10	-0.0855830725131086	0.0245743222153543	0.508864218114884
YAR068W	10	0.0097114490442504	0.0424820005317787	0.930988636735616
YAR069C	10	-0.0400933865172032	-0.0533905817570164	0.715124206094794
YAR070C	10	-0.503466535308611	0.0235229433367232	0.182169373824809
YAR071W	10	0.259351736971595	-0.00844330230657352	0.229260707399597
YAR073W	10	0.0345498997415209	0.0701331152165048	0.691841752823043
YAR075W	10	-0.0346597392238305	0.00888456764381385	0.657737051776448
YBL001C	10	0.0149570131459816	-0.0113546199535859	0.802495443191332
YBL002W	10	-0.00171324307899983	-0.00649908100612811	0.943059035024453
YBL003C	10	0.0205462365659625	-0.00474511552332129	0.499120281013152
YBL004W	10	0.202077847688097	0.1135508607624	0.175979908882745
YBL005W	10	-0.0111345211436855	0.00314967513984704	0.727796258352877
YBL006C	10	0.0290826875236949	-0.00362058660076508	0.291579998455139
YBL006W-A	10	0	0	NaN
YBL007C	10	0.0405834496403403	0.035049572789065	0.372263038482685
YBL008W	10	0.191937815555476	0.0599517971055827	0.129855115032504
YBL008W-A	10	0.164455056197618	0.030354804272224	0.342552362515027
YBL009W	10	0.111383999578825	-3.92438888610069e-05	0.335711920490887
YBL010C	10	0.0632787376797087	-0.00173343327738115	0.329906657054564
YBL011W	10	0.0221406005853242	-6.21892821901808e-05	0.665917405940214
YBL012C	10	-0.0916646074391679	-1.67919193753479e-05	0.191968515753377
YBL013W	10	-0.0306282860826567	-0.0883342275015159	0.709588473501233
YBL014C	10	0.145657536917895	-0.000373028776926305	0.284428448007493
YBL015W	10	-0.00846857426677862	0.0491110876474727	0.911686366773295
YBL016W	10	0.115069703442532	0.05146422970103	0.101240565437588
YBL017C	10	-0.00102262611301016	0.010628296503351	0.979604736044155
YBL018C	10	0.0577780394313003	-0.0546871874350947	0.672654399020059
YBL019W	10	0.0172236417503307	2.60594650700634e-05	0.69203871270791
YBL020W	10	0.0938654724532528	0.0230338987675233	0.251269579136642
YBL021C	10	-0.0024930016306124	0.0055673920837543	0.940737539132607
YBL022C	10	0.0496142394762764	0.0413274036040349	0.511262507090517
YBL023C	10	0.089390771222288	-0.0109425180224141	0.359181371477507
YBL024W	10	0.0910769814145118	-0.000914305918186333	0.297611355519706
YBL025W	10	0.00705075125760831	-0.00263001217483245	0.879274814761505
YBL026W	10	-0.0396468303920494	0.0221230420388414	0.749861552602394
YBL027W	10	-0.0387305883908886	0.00714447473666591	0.323014603119808
YBL028C	10	0.143313284413116	0.00663990744770636	0.315321935453821
YBL029C-A	10	-0.107494336370853	0.0394838224302452	0.5090092778762
YBL029W	10	-0.0173237898427725	0.00967640178278073	0.755012743381719
YBL030C	10	-0.0360558096628171	0.00544095089472225	0.434336819948509
YBL031W	10	0.0675580036586199	0.0126069472372679	0.384543156642883
YBL032W	10	-0.00151430091174569	-0.00558283255954564	0.9695017857555
YBL033C	10	0.139241036357621	0.110016253616573	0.0661087121068745
YBL034C	10	0.0651623910863223	0.00418775666425694	0.473318356269135
YBL035C	10	0.136888909124352	-0.0054020639409029	0.353313245813056
YBL036C	10	0.0753938078660945	0.0297281107470188	0.250682571999959
YBL037W	10	0.012500112370127	0.00415394162928936	0.80237885203854
YBL038W	10	0.0893548648597142	-0.00658055733964171	0.163249115066316
YBL039C	10	0.102292932530432	-0.049692961684883	0.53681583745569
YBL039C-A	10	0	0	NaN
YBL039W-B	10	-0.0764866511543828	-0.0632094541133962	0.256244675190054
YBL040C	10	-0.0490070796472974	0.0150130351033631	0.569562600501469
YBL041W	10	0.0084851552059081	0.025527964627501	0.8858079582551
YBL042C	10	-0.0122976233621095	-0.0659973093863529	0.914630794266972
YBL043W	10	0.117574855439569	0.0685811589822583	0.412079887188759
YBL044W	10	0.0465210102941149	0.116527745792003	0.633675184633575
YBL045C	10	-0.0463719267837737	0.0110962781359242	0.449785383823461
YBL046W	10	0.0143211753075162	-0.00778019374096657	0.743236426107793
YBL047C	10	0.0242567150102187	0.050077553379268	0.630056102425648
YBL048W	10	0.0836106294575197	0.068659719260468	0.449012731383403
YBL049W	10	0.0432782093905703	0.00737425640901134	0.534427466754834
YBL050W	10	-0.0155410588063731	-0.0168613262850143	0.662258725500342
YBL051C	10	0.0431205075061119	0.0543139781640443	0.194504632574094
YBL052C	10	0.112960794375041	0.0776086609619294	0.273380489913084
YBL053W	10	0.0625504399252449	0.0261935980127255	0.407632122592711
YBL054W	10	0.206895144817278	0.0343244476559531	0.336876262681387
YBL055C	10	0.0539161809964609	0.0316389392277716	0.406733680113996
YBL056W	10	-0.0142648161114209	0.00387705763661856	0.664760837052142
YBL057C	10	0.0534282752825998	-0.0268735319196405	0.554594013670773
YBL058W	10	-0.0238734213758476	0.0278572272618364	0.698744569410348
YBL059C-A	10	-0.0322173243267726	0.00657722870244091	0.565191114334252
YBL059W	10	0.0777645656222101	0.0899122298602656	0.223940532406511
YBL060W	10	0.13045309069968	0.00139349405916622	0.233340990350166
YBL061C	10	-1.48889047074323e-05	-0.0390004440270637	0.999808953401071
YBL062W	10	-0.0241895565613242	0.00241025753570797	0.672644078584798
YBL063W	10	0.0317029787852269	-0.048249284700674	0.685249090284594
YBL064C	10	0.0568095050277361	0.0679383097442143	0.727205411483042
YBL065W	10	-0.0731624195921725	0.0415219162074179	0.682774838471494
YBL066C	10	-0.0117914951065241	0.010051213289898	0.724037599339525
YBL067C	10	0.0588369144846761	0.0266981431888068	0.317364953976494
YBL068W	10	0.160172596727861	0.00494839534124472	0.158806751387202
YBL068W-A	10	0.0627048631219471	0.0315186070721182	0.67489022046951
YBL069W	10	0.0162979434261508	0.00839264983683285	0.733146776438447
YBL070C	10	-0.0108101946728	-0.0165679942132141	0.858312082085031
YBL071C	10	0.133745246398402	0.0440069371223735	0.393874219667829
YBL071C-B	10	0.367901359550482	0.128706895279291	0.250278527395614
YBL071W-A	10	0.108533008440206	-0.00914453653632468	0.327433105285832
YBL072C	10	0.0414380356520963	0.0147372776504333	0.504144814720886
YBL073W	10	-0.00344436874158462	-0.0220448797161406	0.953747208857474
YBL074C	10	0.0990293599066574	0.00220768761450057	0.209091734664068
YBL075C	10	0.0493301906538847	0.0378044889090878	0.367723762409276
YBL076C	10	0.0147841553243852	-0.0259217465124068	0.7762272909346
YBL077W	10	0.0209611241544727	0.00532430811657093	0.706174340542008
YBL078C	10	-0.206667258461207	0.00878092664222175	0.291382303947881
YBL079W	10	0.16415513828763	0.031492306085148	0.182876205378808
YBL080C	10	-0.0180151555886424	0.00318493647139469	0.666898673975816
YBL081W	10	0.106811826056596	0.0138254097137735	0.462447131691997
YBL082C	10	0.0605460849673086	0.0352141805354488	0.406285725497329
YBL083C	10	0.00118795637565412	0.0211297596834655	0.988431074382905
YBL084C	10	-0.00175390135363886	0.0108675556318017	0.966568241150583
YBL085W	10	-0.0442294391198543	-0.00142921669092025	0.366834908513059
YBL086C	10	-0.0410732114236507	-2.30294996130314e-05	0.565921157340546
YBL087C	10	0.00107659879222939	-0.0148241632921294	0.978890937453023
YBL088C	10	0.101919334747542	0.014650139478773	0.0899419742092495
YBL089W	10	0.0445132844214766	0.0199898157966875	0.124369811526437
YBL090W	10	-0.0172878251007343	-0.0127354835554446	0.626267760668192
YBL091C	10	-0.0355667001944158	-0.0152772377660717	0.42075546673797
YBL091C-A	10	-0.0450459809920135	-0.00293356918550514	0.57005390981898
YBL092W	10	0.015563275223981	-0.00737082112786336	0.566679248967359
YBL093C	10	0.0306709802008101	-0.0216984248526719	0.678881390671016
YBL094C	10	0.0430461704052674	-0.0230284121408391	0.494883314785587
YBL095W	10	0.00757033652095103	-0.013115216882969	0.86739536387664
YBL096C	10	-0.0403547525848145	-0.0456133169407745	0.509691088452158
YBL097W	10	0.0429792971393394	-0.0274888697159073	0.662428495452421
YBL098W	10	-0.0786225069825615	0.0116094240831236	0.312407835866365
YBL099W	10	-0.0238952210412753	0.0261523360274777	0.737181199972126
YBL100C	10	0.0537933928396415	0.0283652668870362	0.754126122672421
YBL100W-C	10	0.336038019969716	0.00465432714319437	0.19439896185594
YBL101C	10	-0.0121969310046196	0.0369019617080049	0.897162370155877
YBL102W	10	-0.0150157493575121	-0.0360787991377589	0.664109894199738
YBL103C	10	-0.00667570231658498	0.00839118660309831	0.90469279833928
YBL104C	10	0.0579990835602944	-0.0204435822999936	0.348024191726171
YBL105C	10	-0.029035213465092	-0.0341594586558831	0.455760491327779
YBL106C	10	0.0638623576095038	-0.0539951542410364	0.49174313258837
YBL107C	10	0.0307112410461428	0.0327619732614612	0.511313561593491
YBL107W-A	10	0.240597797666701	0.0692406616062119	0.347685560332894
YBL108C-A	10	1.52068701764941	0	0.168664381391678
YBL108W	10	-0.0172512160128815	-0.0059635162374001	0.902105771208216
YBL109W	10	0.00484084507091827	-0.00483071267927648	0.972429878930451
YBL111C	10	-0.369950656840597	-0.21880255688916	0.428358740188996
YBL112C	10	0.0207471814976547	-0.00479033546993538	0.816368143047495
YBL113C	10	0.0162953541513361	0.00825228991642545	0.865907710985685
YBL113W-A	10	-0.114112526657026	-0.114245203232408	0.654457708896285
YBR001C	10	0.0179705452737548	0.0482775783876417	0.773291711011963
YBR002C	10	0.0711389049986599	-0.00533853801216189	0.433861465457598
YBR003W	10	-0.00284233451547962	-0.0100847702606419	0.940283860012239
YBR004C	10	0.218537290038806	0.0512665793090536	0.170010455735317
YBR005W	10	-0.0806534107593393	0.0253053668321384	0.677434447886518
YBR006W	10	-0.0662922889950099	0.0268915027171065	0.516904576257054
YBR007C	10	-0.0100750940600039	0.00691223158224452	0.773145503719551
YBR008C	10	0.0461161396570576	0.0209610311724754	0.380923794302639
YBR009C	10	0.00158993600264193	0.00110747965400893	0.961381017978011
YBR010W	10	-0.000859892321553587	-0.0273586950001298	0.984864928881369
YBR011C	10	0.0285237391999295	-4.92120406264811e-05	0.582423466220687
YBR012C	10	0	0	NaN
YBR013C	10	0	0	NaN
YBR014C	10	-0.0140877674121629	-0.0108559097812124	0.707759211577373
YBR015C	10	0.0309715772056169	0.000165066440913001	0.40445014562024
YBR016W	10	0.0211491963989503	0.0371972534532055	0.786864380369601
YBR017C	10	-0.00148811872919881	-0.00735180593161839	0.977432703910413
YBR018C	10	0.00113194079341204	0.0195667077753628	0.992600658328567
YBR019C	10	0.00991419823161466	-0.0502623745505173	0.915701283138852
YBR020W	10	0.0672143924737702	0.00598725287798734	0.213264959893922
YBR021W	10	0.0698041535882719	-0.0148416002787652	0.442269898143249
YBR022W	10	0.0536564509966987	0.0174291037139574	0.393529521557332
YBR023C	10	0.0626619761736447	-0.00324031632006146	0.462889059332144
YBR024W	10	-0.0634833226077871	-0.00791146796356718	0.452146407988981
YBR025C	10	0.00595646872968135	0.016584844532321	0.883751510536612
YBR026C	10	-0.0647988446592804	-0.0348435905174593	0.367070643268214
YBR027C	10	-0.022043891531961	-0.0240285991686921	0.763498174613815
YBR028C	10	0.102420968626743	-0.000673087081360988	0.347183500923711
YBR029C	10	0.0880245775478964	-0.0214910840036451	0.374980611893413
YBR030W	10	0.063276050319951	-0.00441383063976898	0.604515162624519
YBR031W	10	0.0315579325220649	-0.0279948447985246	0.607250656083836
YBR032W	10	0.0201131197152897	0.00488502595494939	0.816805090931169
YBR033W	10	0.0399471160181384	0.00810124021517969	0.256664394457572
YBR034C	10	0.211778858912917	-0.0115903769412981	0.270437096530248
YBR035C	10	-0.0499130197444662	-0.00346134061818592	0.30058921704723
YBR036C	10	-0.0263487666012872	0.00852608191559204	0.555887315931454
YBR037C	10	-0.0365962149857958	0.00185720581832625	0.399423822624971
YBR038W	10	-0.0158730355851163	-0.0672664361760429	0.873913443438283
YBR039W	10	0.0491075714580796	0.00537201498131545	0.365992013137332
YBR040W	10	0.240490978638541	0.136939172402093	0.369806321832437
YBR041W	10	0.00649116209450408	0.0150022385812303	0.864804579347548
YBR042C	10	0.0876252068231868	0.043696187451358	0.21162179165736
YBR043C	10	0.0537297165214417	0.053652206928432	0.392240436290666
YBR044C	10	0.0355929428673142	0.01920593755348	0.421702370363838
YBR045C	10	0.062202509705891	0.021483769816548	0.387942200256875
YBR046C	10	-0.0638287135819468	-0.00056768908062654	0.496419653484767
YBR047W	10	0.0179654343498506	0.0255258536352964	0.859941617936673
YBR048W	10	-0.00543115933039153	-0.00117317033671614	0.867171379654717
YBR049C	10	0.0488606189508957	-0.00433949320312438	0.475728665449077
YBR050C	10	0.184914588814229	0.0449966322100414	0.21885373586451
YBR051W	10	0.126611371017751	0.163726226930652	0.50004676931267
YBR052C	10	-0.110786628158859	-0.00709870148320917	0.350635765515369
YBR053C	10	-0.0904915358521976	-0.0159071472401099	0.407210378258262
YBR054W	10	-0.0954509503917857	0.0628816886409261	0.839657215742078
YBR055C	10	0.0697146912588525	-0.00311056111609463	0.348273386506132
YBR056C-B	10	0	0	NaN
YBR056W	10	-0.0876531160803494	0.00864182568298795	0.551299705350119
YBR056W-A	10	-0.0462524899731474	0.0402974394304614	0.791010497797685
YBR057C	10	0.0365243887713531	0.00790924646987774	0.607753123752009
YBR058C	10	0.0070564080483639	0.0168724166105459	0.901801049587387
YBR058C-A	10	0.011688120184093	0.0492110355542529	0.927422777283279
YBR059C	10	-0.00456812909235969	0.00985210943403802	0.938136687699755
YBR060C	10	0.0607923384637703	0.00372053420473481	0.291063816189119
YBR061C	10	0.0793805557866307	0.0158963026431637	0.46146124437743
YBR062C	10	0.0587623404767986	0.0198936412349246	0.420752951090991
YBR063C	10	0.0360406633703202	0.00422502806383332	0.645791631707681
YBR064W	10	0.14948867144158	0.174038328294568	0.532302806280884
YBR065C	10	0.0532669346380264	0.0377208119032271	0.286640497825247
YBR066C	10	-0.00126308913446567	-0.0199167104328598	0.988753150934384
YBR067C	10	-0.0240631380498432	-0.0123733393840849	0.656323418676028
YBR068C	10	-0.0292150306559428	4.1949017863504e-05	0.576221042674862
YBR069C	10	0.107542556229065	0.010217871858122	0.338718852185414
YBR070C	10	0.0755190087074108	-0.00241750260936652	0.387049860140153
YBR071W	10	0.0714834058916682	0.0220961586815997	0.301973600852117
YBR072C-A	10	-0.0277533395499016	0.0901852551927685	0.88200284014042
YBR072W	10	-0.132888016722626	0.0551947095822894	0.775098404109055
YBR073W	10	0.0833688690974267	-0.00883340811338777	0.375355251543898
YBR074W	10	0.069315652948553	-0.00683378592505559	0.270153144862373
YBR076C-A	10	-0.0302685626675028	0.0329943509257426	0.727287368615299
YBR076W	10	-0.019844138809801	0.0120226952591033	0.767355864248378
YBR077C	10	0.00130805077462216	-0.0189905992357064	0.957566559189872
YBR078W	10	0.00464519535102327	-0.0121647938724394	0.916520613572166
YBR079C	10	0.0412972493176437	-0.000810914228384144	0.568821708024546
YBR080C	10	0.00224853078442603	0.00384076199554337	0.948434170367679
YBR081C	10	-0.000254900016945507	-0.00488796842769547	0.993437814277433
YBR082C	10	-0.0114109506878262	0.00809952953150424	0.813225546079695
YBR083W	10	0.0264673730347032	-0.0646268985512119	0.774522007397482
YBR084C-A	10	-0.018526994018792	-0.0264510181816912	0.545546498526985
YBR084W	10	0.0226323835494938	0.0063594619220525	0.748160774388023
YBR085C-A	10	-0.163008071442464	0.0325965781459928	0.423431350861985
YBR085W	10	0.0748414408805187	-0.00101273197670515	0.413982611332298
YBR086C	10	0.0258649635040205	0.0263739842589247	0.538617930189948
YBR087W	10	0.0997477945974679	0.0336469281327007	0.260744685497292
YBR088C	10	0.0687120885546423	-0.00571200191366414	0.525769356605865
YBR089C-A	10	0.0268400243121893	0.0250210085805631	0.31408145485379
YBR089W	10	0.0689456961973541	-0.0374607462707693	0.555109970678047
YBR090C	10	0.0731995244068826	0.0789651319501496	0.316165124404957
YBR091C	10	0.0517067465984717	-0.0156909661695228	0.365701611443173
YBR092C	10	0.116421359157288	0.0630689618410068	0.295507683817805
YBR093C	10	0.11255166267559	-0.0400196581550605	0.431486753751183
YBR094W	10	0.121156481100518	0.0279501735851533	0.165960362075693
YBR095C	10	0.0256638183368368	0.0304293318499563	0.605614350252831
YBR096W	10	0.0491289384417924	0.00591709791298026	0.506226023037879
YBR097W	10	0.0843712150108775	0.015954507219868	0.250154030693689
YBR098W	10	0.157633746859067	0.100053749199949	0.054623378785884
YBR099C	10	0	0	NaN
YBR101C	10	-0.02832257815963	0.0137732179874785	0.747886803843469
YBR102C	10	0.0574960586750757	0.012235587910009	0.239175054478134
YBR103C-A	10	-0.0269751348294209	0.000249851203724494	0.900392962793167
YBR103W	10	0.0117038255246465	0.0096322856373232	0.753931301732931
YBR104W	10	0.0721329915487356	-0.0568343959312369	0.587667857459178
YBR105C	10	0.0434233309359554	0.0231111709656426	0.434778977129227
YBR106W	10	0.0516607858917125	-0.0269761673687609	0.421849383014095
YBR107C	10	0.0508963542278855	0.0224209192821641	0.304438670192142
YBR108W	10	0.0196335507782265	0.0760052067639316	0.840068908614675
YBR109C	10	-0.00438047166037719	0.0019088931020642	0.908848552529239
YBR109W-A	10	0.129442292379655	-0.00556273127643477	0.414893455827946
YBR110W	10	0.0253481453078514	0.00741179681041026	0.342276378386386
YBR111C	10	0.00576738525541596	-0.0422657827021263	0.92935584478415
YBR111W-A	10	-0.0612242528240164	0.0278315340671369	0.456108365368373
YBR112C	10	-0.00660416101274657	-0.00807107701641418	0.803121229428296
YBR113W	10	-0.0161902312885432	-0.0144480119009401	0.656726849993583
YBR114W	10	-0.0662393677279523	0.000164955114246465	0.336996394456403
YBR115C	10	-0.0611032721781259	-0.0309472870600059	0.513347334536534
YBR116C	10	0.071489520539142	0.0138425709253385	0.382521283817924
YBR117C	10	0.0707234938497571	0.0301559849244969	0.382462372883309
YBR118W	10	0.0221068002275557	0.00204023238445725	0.508612107716415
YBR119W	10	0.00504769531085797	0.00199137986743659	0.718550249481908
YBR120C	10	-0.00046805928534021	0.0301679921682698	0.993749830289444
YBR121C	10	-0.0086808123370661	-0.00785654248955491	0.735676313163641
YBR121C-A	10	0	0	NaN
YBR122C	10	-0.0419197884433261	0.00384706768106247	0.326679632869002
YBR123C	10	0.034202454349188	-0.0016066454552096	0.308622268386731
YBR124W	10	0.0102737912122973	-0.0167217056281221	0.908110772188008
YBR125C	10	0.0439469553315514	0.0247695572044284	0.430558000055035
YBR126C	10	-0.221247586498111	0.00059796912060832	0.254479091852146
YBR126W-A	10	-0.0427650009439547	-0.0593331684724045	0.729390546539753
YBR126W-B	10	0.554045634244373	-0.0171922965438075	0.256859435051876
YBR127C	10	0.0260863615984679	-0.00191512489711512	0.357529756071588
YBR128C	10	0.0636572735581618	0.0173887164335803	0.491817964612498
YBR129C	10	-0.0104092552509553	0.0804063320140011	0.905470751687633
YBR130C	10	0.021445813936947	0.0144397973385329	0.711006905289438
YBR131C-A	10	0	0	NaN
YBR131W	10	0.0627176107577423	0.0193682471373116	0.297822894493605
YBR132C	10	-0.0292804502317674	0.0476623959482729	0.809754716527146
YBR133C	10	0.0679207775219918	-0.0395892872393536	0.524513861218454
YBR134W	10	-0.0219164275203627	-0.121781934455856	0.893135669108514
YBR135W	10	0.0259445189643396	-0.0354727876205768	0.70450506139395
YBR136W	10	0.0739145930865292	0.0848315182342407	0.144370578857621
YBR137W	10	0.0126742230778996	-0.0149444661556216	0.848378921365926
YBR138C	10	-0.0390345171713658	-0.0359650448435811	0.628244527239987
YBR139W	10	-0.0818792397499328	0.0340389794239221	0.577759548289385
YBR140C	10	0.0809820521296654	0.0202532131289629	0.128237204451078
YBR141C	10	0.107993364689298	-0.0368004099015894	0.422726731776082
YBR141W-A	10	0.683159372884066	0	0.153169631952954
YBR142W	10	0.186350842954216	0.0489329841619891	0.229845907324506
YBR143C	10	0.0847229088862303	-0.0162043072779689	0.263232936381333
YBR144C	10	-0.0389989866442491	0.0483569986030332	0.827398677913567
YBR145W	10	-0.0910423910710711	0.113712379494845	0.690723386003349
YBR146W	10	-0.0161813084405404	0.0344733103940185	0.802976737872189
YBR147W	10	-0.248765781192796	-0.00956627501030533	0.352112207519332
YBR148W	10	0.0424756961365825	-0.0042619525373132	0.484568603764769
YBR149W	10	-0.0926492529091125	-0.00387726056663672	0.39622965609074
YBR150C	10	0.0802280631114299	0.0134762836502266	0.311196431250271
YBR151W	10	-0.00647690100362776	0.040257045175442	0.905723821634503
YBR152W	10	0.072044833923017	-0.00215243791427986	0.339995634312469
YBR153W	10	0.0554992804137786	0.00484516409258818	0.386843521033447
YBR154C	10	0.0417434531868917	0.00395561452120281	0.62878152411317
YBR155W	10	0.0988772268790139	0.00160671152341042	0.36868776680327
YBR156C	10	0.0825840073044538	0.0145700446719069	0.27660390023894
YBR157C	10	-0.0809520379089559	0.00772008274119195	0.230536130342611
YBR158W	10	0.140502092775541	0.0225614446381665	0.268458945139539
YBR159W	10	-0.0153672138117231	0.00601252132444576	0.593872833487455
YBR160W	10	-0.0431947716050869	-0.0428678218423847	0.526414107626334
YBR161W	10	0.0167949667974578	0.00191634102538828	0.259116191705631
YBR162C	10	-0.00668430800138851	-0.00872918950062423	0.837174233273016
YBR162W-A	10	-0.0141490843662286	-0.0043041084567076	0.786191065423819
YBR163W	10	0.0916683868765243	0.00303706850815926	0.333638398153479
YBR164C	10	0.0490414991491438	-0.0116959501737017	0.338744283870187
YBR165W	10	0.0082735771741438	0.0412196621589975	0.890323230942077
YBR166C	10	0.0521602277406019	0.0017938495776742	0.273728541258528
YBR167C	10	0.0160415763098412	0.00833722688240804	0.66998973709535
YBR168W	10	0.0300046996150616	0.0158462027618394	0.437854393345941
YBR169C	10	-0.170222718168781	0.0862076822675056	0.615024591900744
YBR170C	10	0.0346689534303091	0.0134421535531883	0.493907348219194
YBR171W	10	0.0287641364869029	-0.0058574486925989	0.580333593627674
YBR172C	10	0.1061049009733	0.0231136324356916	0.229548282128984
YBR173C	10	0.0150059238581581	0.0380856415496651	0.710840493073508
YBR174C	10	0.0979783851459749	-0.00895834181924535	0.54337180547132
YBR175W	10	0.0495294407336454	0.00365315474788523	0.548594266338267
YBR176W	10	0.116813773231008	0.0164430247482515	0.160078194510644
YBR177C	10	-0.0971113963817024	-0.0358787487617998	0.16189575917519
YBR178W	10	-0.0545818008743309	0.0202889978201704	0.547729326534527
YBR179C	10	0.0125764903093584	-0.00530221576100305	0.792638993976735
YBR180W	10	0.0650238935249042	-0.0131806749524095	0.531450718874447
YBR181C	10	-0.0151848754825674	-0.0145935101689629	0.743384435525418
YBR182C	10	-0.0098679441687994	0.0697696344350147	0.949097261044903
YBR182C-A	10	-0.0309174890802084	0.0313696476633665	0.828988336139812
YBR183W	10	-0.138743400895937	0.0210201948041212	0.425005606484779
YBR184W	10	0.0282689701653017	0.029639092511323	0.677071909899349
YBR185C	10	0.0228293556278654	0.003275283523787	0.665394045524392
YBR186W	10	0.116493237303261	0.00326252883340579	0.32317359609933
YBR187W	10	0.00867809296528265	-0.00486378288920699	0.923510134677031
YBR188C	10	0.00609157800976556	-0.0074833753010884	0.834984255664725
YBR189W	10	-0.033218988329442	-0.015170592214091	0.43144402559825
YBR190W	10	-0.00611543038397225	-0.0181542182697702	0.915748179365284
YBR191W	10	0.0132040311604983	-0.00215421222840618	0.796023064370118
YBR191W-A	10	-0.0585249380175064	-0.00704150220908158	0.601700491716294
YBR192W	10	0.0234312750007328	0.0231763471552524	0.789129592294037
YBR193C	10	-0.0317815849676248	-0.00968193878800888	0.506315979218084
YBR194W	10	-0.0283468577763799	-0.00137399430479176	0.573001481887892
YBR195C	10	0.0711954574061655	-0.00355460481379836	0.575382811048633
YBR196C	10	0.00358410907367023	0.0137077144267899	0.904173401694711
YBR196C-A	10	-0.00350477433054133	0.0413272875197626	0.973565012851931
YBR196C-B	10	0.352982442694504	0.0955937872945126	0.11503261728343
YBR197C	10	-0.028407382832874	-0.0430386496425582	0.702292812517203
YBR198C	10	0.0495058867501737	0.0142300013313961	0.347365226273389
YBR199W	10	0.0384004575261259	0.0230486208426283	0.282037000715972
YBR200W	10	0.0838315576572655	0.0119537391320832	0.22385354743516
YBR200W-A	10	-0.0278535417330403	-0.0304524424274514	0.9150972255608
YBR201C-A	10	-0.066272844473596	-0.0606667456816572	0.536089993944573
YBR201W	10	0.0123264748946934	-0.0226533369130531	0.765254966194919
YBR202W	10	0.115777470626289	-0.000463750526751807	0.284366562499584
YBR203W	10	0.0741295492625144	0.0822834575776603	0.524255806072132
YBR204C	10	-0.048478540529945	-0.00166113999114923	0.567302049732212
YBR205W	10	0.00161206929760442	-0.0181812377486051	0.967612459207911
YBR206W	10	-0.0353077737540042	-0.0144051241155341	0.314489435197024
YBR207W	10	0.0617862022855502	0.053567129389677	0.224649074949352
YBR208C	10	-0.0718025706064142	0.0126374348020428	0.462047071350103
YBR209W	10	-0.0481528727834307	-0.0136447535254902	0.651039979901792
YBR210W	10	0.0164695278012784	0.0365715795390229	0.796877078251812
YBR211C	10	0.0122585420258605	0.0123116936086889	0.769045986517207
YBR212W	10	-0.0228564506268201	0.002974228767498	0.514743411425289
YBR213W	10	0.0540360745141644	-0.00212218781867439	0.629138922046029
YBR214W	10	-0.236107853847576	0.0424252760463205	0.329324808491708
YBR215W	10	0.04561859446737	0.0113496723125392	0.386045611411705
YBR216C	10	0.0470801792448837	0.0324676379229689	0.327568829001554
YBR217W	10	0.047680347242365	0.0238416950716435	0.317344945193816
YBR218C	10	-0.0159406527308742	0.0296895432710357	0.748125450859354
YBR219C	10	0.241238108797145	0.342313565744811	0.380557820705258
YBR220C	10	0.0249879693886921	-0.0120934045424196	0.696936396414163
YBR221C	10	-0.0245238937249879	-0.0113093230589325	0.330083044551293
YBR221W-A	10	0.220770096781349	0.0928118474698297	0.574738088898106
YBR222C	10	0.00894351266383807	0.0137331761070343	0.853027191463635
YBR223C	10	-0.00663304454149666	0.00886983193420687	0.906519464356166
YBR223W-A	10	-0.186659027498812	-0.144155298866135	0.365090098510806
YBR224W	10	0.0677579844737467	0.0396492624458156	0.679679721113911
YBR225W	10	-0.00279499073683962	0.0133759152595669	0.953405384016465
YBR226C	10	0.0397765168131726	0.0409448492627216	0.492477419374592
YBR227C	10	0.0151194286896379	-0.00351654387708015	0.654573192362244
YBR228W	10	0.0204597175402559	0.0241438072113795	0.634175792597724
YBR229C	10	0.0406223511420554	0.0262657312566069	0.273594936367695
YBR230C	10	-0.0395579230602555	0.0177363292161535	0.75947136663
YBR230W-A	10	-0.0547039903582941	-0.00887528404969283	0.709842025728126
YBR231C	10	0.0705179506049511	-0.00404046739918076	0.309479069670215
YBR232C	10	0.00869426041452366	-0.0124057700677544	0.855893295412441
YBR233W	10	0.0557312217971298	-0.0166519511123716	0.430730124367348
YBR233W-A	10	-0.0384093214331048	-0.0747955897277813	0.49286360538936
YBR234C	10	0.011255812436826	-0.0126092448114141	0.764024050936938
YBR235W	10	0.0322877146329114	-0.000491981384371308	0.514356630855382
YBR236C	10	-0.00164999714589412	-0.0181507035500398	0.973742936505139
YBR237W	10	0.0141429508916507	0.00328541448319963	0.740940773264545
YBR238C	10	0.0643928355081998	0.00176520063197801	0.59472755634831
YBR239C	10	0.0922150561767957	-0.00433776542487269	0.277421408425911
YBR240C	10	-0.0445469951821745	-0.0256271917940583	0.450013305857548
YBR241C	10	-0.104642528163523	0.042081244147527	0.38452397987629
YBR242W	10	0.121272411481801	-0.0206621679525638	0.302256266298712
YBR243C	10	0.0140298333669928	0.000696500825968858	0.702392727572011
YBR244W	10	0.0961455458790542	0.0309343873132754	0.454148765638146
YBR245C	10	0.0490936105640311	-0.0120056538729806	0.422175430068351
YBR246W	10	0.0571107378807148	0.0189460572878074	0.389357193502927
YBR247C	10	0.173060790805605	-0.0181970540348225	0.253411291044358
YBR248C	10	0.01610984866791	0.0812415460303909	0.853515952041671
YBR249C	10	0.045010951290541	0.0292850295967699	0.204878642554938
YBR250W	10	0.0128034904430579	0.0043715259589297	0.807772298748077
YBR251W	10	-0.00214466514527289	0.0197422320035059	0.968556348431923
YBR252W	10	0.028482654617934	-0.0199407191369793	0.698877807166091
YBR253W	10	0.0454410386077312	0.0093503950177568	0.360227313315448
YBR254C	10	0.0201606139208434	-0.0378904209468953	0.692666153787009
YBR255C-A	10	-0.0244516173520048	0.00741599579766573	0.568686795165666
YBR255W	10	0.0273980654731055	0.046103827683008	0.593777582722174
YBR256C	10	0.011377462280639	0.00749251668169504	0.857363150389712
YBR257W	10	0.0825417710912991	0.0233164254973668	0.351056671538773
YBR258C	10	0.0809736460144747	0.0326174861699062	0.190585297227529
YBR259W	10	0.130844079865347	0.0494689265827594	0.191923918707364
YBR260C	10	0.00358369965097802	-0.0111478936264722	0.891949011376608
YBR261C	10	-0.10162624810153	0.0195625878630084	0.192330526783203
YBR262C	10	-0.00723799750339498	0.00145523964002045	0.887902390759533
YBR263W	10	0.0234218979869873	0.00630355485001171	0.36733385869961
YBR264C	10	-0.00304169367682373	-0.022023307595045	0.956529062081292
YBR265W	10	0.0925901204313684	-0.0185982914576739	0.39859616913332
YBR266C	10	0.000405337518068742	0	0.343432571579017
YBR267W	10	0.156204793174932	-0.0174450741788098	0.405495712494778
YBR268W	10	-0.018828666219338	-0.0122481788557662	0.451294950276752
YBR269C	10	-0.084873352518456	-0.00851241147332456	0.300962168307914
YBR270C	10	0.0735070409573118	0.0160266125268217	0.190549263217574
YBR271W	10	0.166907323123287	0.0368489382144293	0.276935159402342
YBR272C	10	0.0152882401056238	0.00687760515082132	0.646411616091739
YBR273C	10	0.000982756260625936	-0.00931666625210495	0.980724659894492
YBR274W	10	0.00140597698156323	0.029459984390959	0.980643102571919
YBR275C	10	0.0709935936156217	-0.00327947573726922	0.383777476602265
YBR276C	10	0.0218184861210951	-0.00618456918584633	0.577851174220679
YBR277C	10	-0.0598348090194751	-0.0463180935910492	0.220251640739276
YBR278W	10	0.0130233380318341	-0.0203960832241066	0.737267289319932
YBR279W	10	-0.0297422927857883	-0.0110752282651141	0.192403539116383
YBR280C	10	-0.0444953032820622	0.0084404898919283	0.756682930131045
YBR281C	10	0.0276535160396197	0.0503902773650057	0.668835282504005
YBR282W	10	-0.0104888788148695	0.0135635441671189	0.682129792088678
YBR283C	10	0.0063010509373247	0.00173094588707775	0.640952351289511
YBR284W	10	0.0386115038919158	0.0207901019354416	0.402800605289956
YBR285W	10	-0.0716231028401703	0.0039171028193632	0.586317295023173
YBR286W	10	0.00538968265591532	0.00665288591842259	0.841942100443636
YBR287W	10	-0.0755367708396232	0.012026560380372	0.491521383334567
YBR288C	10	0.0668176987535664	0.0161986579167427	0.234996482368563
YBR289W	10	0.0395441640484097	0.000321860469396674	0.322011111089658
YBR290W	10	0.0804936711135874	0.0335110711336719	0.270487710155986
YBR291C	10	0.0114125316815976	-0.0252002197473588	0.915177553274321
YBR292C	10	0.0962177569028908	0.0309941084428173	0.459617709166974
YBR293W	10	0.0448924711392604	0.00490781742914164	0.381019933436316
YBR294W	10	0.00491650748812891	0.00195843295193041	0.926309187596327
YBR295W	10	-0.0247589823786712	0.00242156327929582	0.508208624541267
YBR296C	10	-0.0540881135881091	0.00877674648727648	0.772178414200252
YBR296C-A	10	0.383138077423304	0.0823049448313501	0.106642223396683
YBR297W	10	0.0451620684554742	0.00897902364491556	0.634506452333347
YBR298C	10	0.0910489491414266	0.0467135591965576	0.284254007477967
YBR298C-A	10	0.0515167000457176	0.0858746822766455	0.827109082994784
YBR299W	10	0.0476666148905034	0.0564179706789531	0.73328451747885
YBR300C	10	0.000422798195228474	-0.00360090243844107	0.996886744877789
YBR301W	10	0.114326398099563	0.0588097896860643	0.39788296475071
YBR302C	10	-0.0563451254397009	0.00542518766431679	0.404066860622613
YCL001W	10	0.105768313405571	0.11473864532158	0.0182972471922506
YCL001W-A	10	0.229288011562344	0.221589900227905	0.0035347710191263
YCL001W-B	10	0.00708688108820005	0.03135833890534	0.951446890618609
YCL002C	10	0.290106356582803	0.274425779775571	0.00258972645888784
YCL004W	10	0.13226341260279	0.122118825788259	0.00463989619454113
YCL005W	10	0.146035645314111	0.137076068192525	0.00608340939800317
YCL005W-A	10	-0.0902857297421083	-0.159333276984034	0.406885123931037
YCL007C	10	0.256619282054598	0.251530459677431	0.00182906787223294
YCL008C	10	0.0883936201736274	0.0890373524073922	0.0029083787245742
YCL009C	10	0.0218063247336987	-1.38063678222274e-05	0.634205106400402
YCL010C	10	0.0782761952964065	0.0329616006104387	0.0896060932345235
YCL011C	10	0.128016976670462	0.111776308252839	0.0310481424527319
YCL012C	10	0.0447387921120754	-0.00684186929698209	0.197024829215894
YCL014W	10	0.0616349105140262	0.0279939433641197	0.296519149849376
YCL016C	10	-0.0499052945156772	-0.144246550551694	0.549755837814542
YCL017C	10	0.0808283016328319	0.0893533119083647	0.0639802575632327
YCL018W	10	0.0353261332092309	0.132264193434812	0.770867697807696
YCL021W-A	10	-0.0934172069313739	-0.000107328013204965	0.387569138309655
YCL022C	10	-0.176960991582862	-0.113085230174664	0.106764319155968
YCL023C	10	0.22462836143759	0.00367453824435528	0.270069433917117
YCL024W	10	0.0166221970439066	-0.0618076840334841	0.875483858476849
YCL025C	10	-0.259803876873569	-0.116169572076115	0.22829143307575
YCL026C-A	10	0.163837918747601	0.140116368914252	0.0467835223921882
YCL026C-B	10	-0.224531840815312	-0.226188319649832	0.0874359875086013
YCL027W	10	0.0993697515904309	0.127882783225725	0.584282975983172
YCL028W	10	0.106978247993999	0.151202095292097	0.0632343256008742
YCL029C	10	0.164056153338212	0.182961904566301	0.0886503989645928
YCL030C	10	0.231144229580449	0.266362052191053	0.0925417355880447
YCL031C	10	0.126833506566749	0.089129761136429	0.110021687687932
YCL032W	10	0.0458310195236665	0.0184542951804334	0.141573426636744
YCL033C	10	-0.0230581050495539	-0.0556513875678083	0.780611489900041
YCL034W	10	0.00681625413715997	0.0200097107416069	0.747512805160149
YCL035C	10	0.013658556553323	0.137130338008389	0.927635645687003
YCL036W	10	0.480645811701994	0.316197657085427	0.0693673277091201
YCL037C	10	-0.0660172064533114	-0.000229602713132291	0.15510399635927
YCL038C	10	-0.029490730186959	-0.0289086345818806	0.564347855618977
YCL039W	10	-0.0290716943356397	-0.00985424617869561	0.178124698250996
YCL040W	10	-0.345784584441929	-0.0116355338351327	0.255051343375842
YCL041C	10	-0.00618373328438064	0.00513811032926357	0.899909036119124
YCL042W	10	0.0757941102813235	0.0534989123371427	0.705034669282304
YCL043C	10	-0.0237470178707518	-0.00655857354886008	0.398543818901426
YCL044C	10	0.0069424762430594	-0.00205518593162761	0.70962681506348
YCL045C	10	0.0415847504105728	0.0322370089029802	0.273879961844106
YCL046W	10	-0.0229635397062397	-0.0165383652034061	0.658331166370345
YCL047C	10	0.0591250412872155	0.0160945591605317	0.271278990036111
YCL048W	10	0.0958031641705815	0.01929613692041	0.456414967081713
YCL048W-A	10	0.00296728555528166	0.0294549699318679	0.98325096943736
YCL049C	10	-0.0440921114387665	0.00168080241834824	0.2821778895815
YCL050C	10	0.105399108656403	0.141603963834295	0.153626957698346
YCL051W	10	-0.0358919676962623	-0.0211578744454583	0.479852880656292
YCL052C	10	-0.0210309295278347	0.00184669357006287	0.758807968731074
YCL054W	10	0.14370620190413	-0.0251958499978157	0.358361288152959
YCL054W-A	10	0.252426370049256	0.142499822225967	0.329763110077756
YCL055W	10	0.0684465683965648	-1.63847475097762e-05	0.626129381898999
YCL056C	10	-0.00939256531179938	-1.38275083862828e-05	0.694558756297385
YCL057C-A	10	-0.035237459787248	0.0208593858034073	0.509240666158452
YCL057W	10	0.0651500082522889	0.0385912638085238	0.204972405302041
YCL058C	10	0.102203258229784	0.0611618408543029	0.465967888943759
YCL058W-A	10	0.0762419053735445	0.00946485787833273	0.428026257587568
YCL059C	10	0.121784070875693	0.0453881770051192	0.178193894341324
YCL061C	10	0.0178626806474102	-0.064466024803768	0.831774723514751
YCL063W	10	0.121359491387921	0.0288350338224057	0.282582427729185
YCL064C	10	0.435756274613357	0.644257978747105	0.0462671905740019
YCL065W	10	0	0	NaN
YCL066W	10	0.102279500570117	0.0656057181199438	0.151936395504568
YCL067C	10	0.141544541116135	0.150017036266005	0.185112836155336
YCL068C	10	0.046967064633847	0	0.172476254767613
YCL069W	10	0.00954356770069305	0	0.343436396137914
YCL073C	10	0.0118604252338807	0	0.343436396137914
YCL076W	10	0	0	NaN
YCR001W	10	0.293786958432152	0.21112705912253	0.0964386888818046
YCR002C	10	0.0182391022343681	-0.00882118691336843	0.606009676276786
YCR003W	10	0.118902529886335	0.0986475063053675	0.0102140255192492
YCR004C	10	-0.0791200078894241	-0.0354776244602404	0.13710798954469
YCR005C	10	-0.0491037148212565	0.0619754922501347	0.689912968389498
YCR006C	10	0.0519646330925979	0.0445586685527749	0.0735268396641164
YCR007C	10	0.177458293220754	0.176910355355851	0.194924711534008
YCR008W	10	-0.0045763998624239	-0.00695269178121838	0.91357654648384
YCR009C	10	0.0112944562271885	0.0310793831719046	0.848962357844988
YCR010C	10	0.169844109888222	0.0245442418054947	0.122964923437386
YCR011C	10	-0.0537061778924926	-9.72353765699152e-08	0.370693082263847
YCR012W	10	-0.0996321441357384	-0.000101270561413274	0.303136548323755
YCR013C	10	-0.0793115715353798	-0.00161938529785434	0.373402965321036
YCR014C	10	0.00598973660703564	0.00454090155047499	0.888866495854251
YCR015C	10	0.182355999052055	0.129579641254061	0.0587642170100102
YCR016W	10	0.164384435763228	0.0461851371033884	0.222895331314564
YCR017C	10	0.01057655643705	0.00136139522948055	0.422306393717228
YCR018C	10	0.0758435797419275	0.0453900325580068	0.468192709848048
YCR018C-A	10	0.265383549086928	0.069537673537742	0.472477381851911
YCR019W	10	-0.00475574440431476	0.0143464988506349	0.926986314404216
YCR020C	10	0.103207802266765	0.0371392917170137	0.23839924872721
YCR020C-A	10	0.11456499567565	0.0738527055792604	0.0608143127632402
YCR020W-B	10	0.166468701827034	0.159914894142927	0.301840893606491
YCR021C	10	-0.277805862318657	0.0709759978998296	0.582662638647146
YCR022C	10	0.0317721993974063	-0.0167940319010615	0.791879050595524
YCR023C	10	-0.0434233455704542	-0.000117432875255681	0.321126732252355
YCR024C	10	0.0612982390620868	-6.11695898016179e-06	0.297364837971889
YCR024C-A	10	0.141010999646973	0.0700596239229266	0.202544676105188
YCR024C-B	10	-0.106194961658869	-0.00621490930425754	0.51159513052643
YCR025C	10	0.0243709699950563	0.0337515145439161	0.754795962088128
YCR026C	10	0.0193500110596007	-9.33765051336598e-05	0.568006809271895
YCR027C	10	-0.000611578507969727	-1.47714817972234e-06	0.980956928181557
YCR028C	10	0.0745781153629173	-0.0239073452821839	0.415709295103942
YCR028C-A	10	-0.006097015708273	0.0202941541108393	0.714328042766525
YCR030C	10	-0.0719179875259032	-0.00962016708212595	0.316628570609362
YCR031C	10	0.0129295479940644	0.0127308946899081	0.640165768009603
YCR032W	10	0.0399638279032894	0.0136684855273929	0.252257279968501
YCR033W	10	-0.00535048535051952	0.00108983741000249	0.83717351463109
YCR034W	10	0.0269133191379494	-2.04253389830072e-05	0.705672375872766
YCR035C	10	0.0599056684441353	0.00789310866431539	0.504739777555438
YCR036W	10	0.0326548200963436	-0.0154176081135873	0.533254259405334
YCR037C	10	0.0344377705425761	0.016394497930656	0.545710666136438
YCR038C	10	0.0226407569967479	0.0390059267213212	0.703959488142485
YCR038W-A	10	0.0396753546621494	0	0.343436396137913
YCR039C	10	0.0184202154013872	0.026892710551258	0.856001483171782
YCR040W	10	0.0543492516708907	0.0176754692207179	0.42703644959862
YCR041W	10	0.00170704880763458	0.0680750813372089	0.985392588415458
YCR042C	10	0.0788171059862241	-0.000351366560316775	0.268066842189176
YCR043C	10	0.116285105236182	0.0145797769670964	0.249591967389472
YCR044C	10	-0.00116763156046652	-0.0158907692113666	0.969441617093315
YCR045C	10	0.049025248793859	0.00773487372532864	0.402630904030506
YCR045W-A	10	0.0948955844343056	0.1528557453309	0.730281913618446
YCR046C	10	-0.0115736307701644	0.00537769437108146	0.71508226463828
YCR047C	10	0.161048028555243	0.0464057345387903	0.272377463825619
YCR047W-A	10	-0.219080661031014	-0.0268067952013564	0.416815662788264
YCR048W	10	-0.00267167335703676	0.0115031398495224	0.912124319196801
YCR049C	10	-0.0247787570247447	-0.0140412517284572	0.4999844347519
YCR050C	10	0.0179082570181371	0.018458443125111	0.717465995251928
YCR051W	10	0.166544703729107	0.0999302465445007	0.156284865002194
YCR052W	10	0.0268483774266853	0.0169644616444145	0.620704404919104
YCR053W	10	0.0272870999749252	0.0191059217895495	0.431079535465649
YCR054C	10	0.163551805368672	0.0135420761311808	0.22978468352267
YCR057C	10	0.292335866021638	0.049335201422867	0.122218981812837
YCR059C	10	0.0276611837783992	0.0399571504893734	0.702076408918197
YCR060W	10	-0.0340722780560657	-0.00341272348087613	0.328106072526631
YCR061W	10	-0.000852554676743628	0.0139359354122798	0.992710109806829
YCR063W	10	0.0446530606389324	-0.00657718954920741	0.40253550544307
YCR064C	10	0.0569954256664229	0.0961097868069298	0.70711310406305
YCR065W	10	0.108420318981259	-0.00355673963953079	0.400613878115047
YCR066W	10	0.0720767465455827	0.0473867127624907	0.105293397334184
YCR067C	10	-0.00352510835759209	0.0456779651309842	0.950185287053725
YCR068W	10	0.0460169498893595	-0.00162618847789138	0.350253886190541
YCR069W	10	0.0335211696597902	0.0221781565223836	0.551907359898033
YCR071C	10	-0.0209320552815447	0.00828994436569362	0.65023966054928
YCR072C	10	0.26298548628561	-0.000498445008588803	0.219513361049967
YCR073C	10	0.0306068365225851	0.0140323308743515	0.599518127586201
YCR073W-A	10	-0.0146035725534706	0.0025383722072716	0.675805975135246
YCR075C	10	0.0291283014433318	-0.00433303591809997	0.583993001306817
YCR075W-A	10	-0.0287843264701901	-0.0600884255597303	0.734781328510434
YCR076C	10	0.0299446086702464	0.00921697086128536	0.495403683258541
YCR077C	10	0.0866915331281655	0.0707326554133599	0.141368139315629
YCR079W	10	0.041991064641645	0.0094279315070701	0.436142446477486
YCR081C-A	10	-0.0163549491859751	0.0464970854268571	0.900203882843291
YCR081W	10	0.180767489172726	0.119533032481812	0.0445362222661795
YCR082W	10	0.0315685953099796	-0.00473302347929687	0.401076380761769
YCR083W	10	-0.0408926327085456	0.004475172047637	0.405607552599685
YCR084C	10	0.0147125140749995	-0.020065480057402	0.788219697241219
YCR085W	10	0.0736341999561422	0.0142800036767689	0.472014853811178
YCR086W	10	0.040089208882667	-0.00286832580801042	0.491286505751475
YCR087C-A	10	7.01939870429755e-05	0	0.340917818102304
YCR087W	10	0.102411260919486	0.00767837979746762	0.308698312309318
YCR088W	10	0.0117965450982252	0.0150733748289897	0.817527114477869
YCR089W	10	0.0974132248554251	-0.0433349680642419	0.461666794635164
YCR090C	10	0.104546295695275	0.0186850619760233	0.120110257234967
YCR091W	10	-0.0588137565509853	0.01518211289857	0.646715154447839
YCR092C	10	0.105650428066849	0.0339890712520958	0.247470634806403
YCR093W	10	0.155116466704776	0.137303380835001	0.0866281997059225
YCR094W	10	0.061576406984768	0.0400716782799617	0.252935100362936
YCR095C	10	0.0501378931764994	0.00871425261789525	0.432690974477491
YCR095W-A	10	0.0740058417751874	0.066274815057762	0.248768136435562
YCR096C	10	0.0416890705508218	0.010938178782426	0.561825461706214
YCR097W	10	0.0149742159578481	0.0146246899571518	0.881030952824824
YCR097W-A	10	0.111047455853786	0	0.169340016847764
YCR098C	10	-0.0475660891491728	-0.0100982561332708	0.337235046554578
YCR099C	10	0.0276773213978942	-0.00692080337098662	0.437406988011248
YCR100C	10	0.0106123799284621	0.00991898625324463	0.822204165734625
YCR101C	10	0.00876768012505117	-0.0199656076233157	0.911920347891478
YCR102C	10	0.017317193600332	-0.000359344460018867	0.719725746174666
YCR102W-A	10	-0.186534378753696	-0.0799221447127066	0.30292057905783
YCR104W	10	-0.0539703585138897	-0.0370527369873263	0.410372100612921
YCR105W	10	0.0257498597842062	-0.0113987453943448	0.632444345443354
YCR106W	10	0.0621045022983702	0.0234049514840745	0.415267100704542
YCR107W	10	-0.0182909614258316	-0.0390364372517935	0.770682880670131
YCR108C	10	-0.773612987436515	-0.0253730777705413	0.196372480099948
YDL001W	10	0.147071921722622	0.0471805268023478	0.0983506289986988
YDL002C	10	0.044307458325727	0.0181563317194923	0.351992623203829
YDL003W	10	0.0128908072764226	-0.119089277379046	0.928616946944073
YDL004W	10	0.0252826724313684	0.0228720919191439	0.625140898510038
YDL005C	10	0.0891141572582547	0.078988020427622	0.137632727630626
YDL006W	10	0.0199101864177908	-1.38689619087252e-06	0.649447431643796
YDL007C-A	10	0.151000283949675	0	0.212980824597222
YDL007W	10	-0.0194367950455573	0.00781285207988314	0.793164648084573
YDL008W	10	-0.0684843178628824	-0.113973755203078	0.489282440942401
YDL009C	10	-0.00303894843379447	-0.0678388551394283	0.957256255225377
YDL010W	10	0.0593046197068329	0.0514015268809929	0.210756509636125
YDL011C	10	-0.0281725697469198	-2.63382180779991e-05	0.767354409801705
YDL012C	10	-0.0535195357955032	0.0278032709854829	0.369679827972884
YDL013W	10	0.0494788223052134	-7.04075149388804e-05	0.369721134409108
YDL014W	10	0.0855976295388524	0.0125914723416994	0.369070683115667
YDL015C	10	0.0810416391780782	0.0815694479497368	0.0629087319470962
YDL016C	10	0.0535594444656109	0.0232187476749581	0.192862963354064
YDL017W	10	0.0560659914097811	0.0530246601708436	0.331148098051753
YDL018C	10	-0.0388831950312268	-0.0130602809358948	0.478149545496607
YDL019C	10	-0.0050759851572192	0.069499067047418	0.956986334531387
YDL020C	10	0.0393694789693594	0.0414540556551667	0.307528109208833
YDL021W	10	-0.0674124850272304	0.362041091452123	0.831773397146231
YDL022C-A	10	0.340543242465142	0.286546488612517	0.646267451838681
YDL022W	10	-0.0844609530178683	0.0944390593223574	0.680947525311154
YDL023C	10	-0.132122767695757	0.0389491643942777	0.608712009173722
YDL024C	10	0.310116839377018	0.111896975237617	0.427796547676544
YDL025C	10	-0.0427488950730381	0.0427589371877409	0.695728147341462
YDL025W-A	10	-0.579443632250549	-0.288320591907477	0.0607549959519334
YDL026W	10	-0.0140056080513149	0.0174381124591992	0.898003684386066
YDL027C	10	0.00961807432207797	0.0427694409266536	0.912504909796064
YDL028C	10	0.0760335143564668	0.0540614218289679	0.148381595127053
YDL029W	10	-0.0369754789478714	-0.0576181338675691	0.330848799997679
YDL030W	10	0.146531709743692	0.0423064707231215	0.0985263906842228
YDL031W	10	0.0897729613897568	-0.0379407355883857	0.431843363527258
YDL032W	10	-0.0705269024319696	-0.0239223971124455	0.554250293890112
YDL033C	10	0.000322601083468665	0.00110800520929134	0.996249695515751
YDL034W	10	-0.0282850317268757	-0.0121293858728783	0.540209923066821
YDL035C	10	0.059237125082231	0.0732400727055251	0.209885547548615
YDL036C	10	-0.00162667093344744	-0.0277141533660164	0.977179721622215
YDL037C	10	0.244813453062895	0.0918999155380388	0.193779613543754
YDL039C	10	0.0786826773357571	0.0213913953452306	0.620979916442269
YDL040C	10	0.00818936455639128	-0.0181088316902678	0.846416642637294
YDL041W	10	0.119508762667583	-0.0419231654958044	0.484408585378999
YDL042C	10	0.0489848757178166	-0.105032726094626	0.754645961554848
YDL043C	10	-0.00706615223650754	-0.0794771920840736	0.947543816620317
YDL044C	10	0.0131248526593504	0.00715731415038468	0.799489249396403
YDL045C	10	0.0343009435707774	0.000156628581947403	0.438098402560607
YDL045W-A	10	0.0314533173150951	0.00439762627149001	0.541365188083218
YDL046W	10	0.0148199636680918	0.00538447024094804	0.402312895972781
YDL047W	10	-0.0141184884275516	0.00227301401500889	0.383071956440838
YDL048C	10	-0.111634374934626	0.0228717885578685	0.537174060145709
YDL049C	10	0.0704359725212199	-0.0356677113822647	0.395689425884363
YDL050C	10	0.0939890828387103	0.0389460653678612	0.303501625667451
YDL051W	10	0.0769147696801805	0.00198699048974495	0.403182032019232
YDL052C	10	0.0414879536699498	-0.00399843226376686	0.320653365130441
YDL053C	10	0.00369556804093026	0.00209827056137428	0.801011144355469
YDL054C	10	0.0771169856401982	0.0345517771159102	0.150270483188367
YDL055C	10	-0.0168365870926206	-0.00435979751222893	0.684887891719526
YDL056W	10	0.0207044477202165	0.00971776286559163	0.717466103789116
YDL057W	10	0.0102044219537628	-0.016319548110031	0.915442939178802
YDL058W	10	0.0210429155776093	-0.0131184400075165	0.702602613560879
YDL059C	10	-0.0677433719307844	0.0219695865713454	0.339880482484011
YDL060W	10	0.168314110945392	-0.0139741274206872	0.261298534976359
YDL061C	10	0.088056053905318	-0.0548917209341754	0.56613302606783
YDL062W	10	0.134662060327963	-0.0542093047076777	0.452314376457582
YDL063C	10	0.102518122002757	0.00233043526200939	0.62819547967193
YDL064W	10	0.0111050972934275	-0.0090313353118368	0.666190901600182
YDL065C	10	-0.00623381418076397	0.00479506326737645	0.834936117753987
YDL066W	10	0.0559843016484743	0.014621377957128	0.405670570165562
YDL067C	10	-0.0272455425458485	-0.00573440534496624	0.569597582004182
YDL068W	10	-0.0128197076148631	-0.000452817036039749	0.788785663681221
YDL069C	10	0.045023946460268	0.0132521307476252	0.443414548033868
YDL070W	10	0.0282801690835177	0.00956540727947566	0.755018537833141
YDL071C	10	-0.00526469213489007	-0.0114421255215987	0.943773111439311
YDL072C	10	0.0323237979588478	0.018287667054267	0.68127146717062
YDL073W	10	0.104290704892335	0.0145585418329775	0.335143479850752
YDL074C	10	0.126111718107732	0.00809221690213183	0.198285664098897
YDL075W	10	-0.00449059152176899	-0.0138924296964316	0.893231922031739
YDL076C	10	0.0320469032745865	0.0293515133205388	0.264358992073879
YDL077C	10	0.039156831377102	0.0038939216672787	0.569372814239678
YDL078C	10	0.000354296132871602	-0.00790358836400247	0.991254041059557
YDL079C	10	-0.0183025587856245	0.0130930290922709	0.704367809190775
YDL080C	10	0.0112896533889726	0.00454797049639779	0.539814611286837
YDL081C	10	0.00801103077369483	-0.00195720772904828	0.721115164777492
YDL082W	10	0.0133304800799048	-0.00250741720061841	0.796122560847251
YDL083C	10	-0.0340245946379301	-0.0228924823440617	0.303419932217162
YDL084W	10	0.0191263399183404	0.0114770457635814	0.60413824303884
YDL085C-A	10	-0.051259549070866	-0.0599600469097199	0.482024627839972
YDL085W	10	0.0739015409116406	0.0788738576376244	0.325225129272521
YDL086C-A	10	0.383718676998595	0	0.343410224000898
YDL086W	10	0.0134257809398405	-0.0196057278304762	0.750346313481427
YDL087C	10	-0.0299342138735797	-0.01618670042955	0.404312618318249
YDL088C	10	0.0406448617911129	0.0290890243709666	0.426751712132239
YDL089W	10	0.00896499279093717	0.00943011663828253	0.850064463304278
YDL090C	10	0.00102644630609613	-0.0224060167779653	0.986367490168262
YDL091C	10	0.0310715673958535	0.0586492763257806	0.698135315141692
YDL092W	10	0.0173641969570261	0.0160190670008413	0.696829375494117
YDL093W	10	0.033597222495115	-0.0109358477768628	0.444203253319442
YDL094C	10	0.101874982907817	0.023031682155984	0.431224139201986
YDL095W	10	-0.00111391352170656	-0.00241357504375083	0.967162039917935
YDL096C	10	-0.00346422410728174	-0.00126573809451846	0.964935385215094
YDL097C	10	0.0302536855205347	0.0286035708273395	0.612952276444847
YDL098C	10	0.0239736251766055	0.00978484147744293	0.790922741357034
YDL099W	10	0.0290292548561491	0.0205825293532693	0.542843413180333
YDL100C	10	-0.0371578976910415	0.000308525339670429	0.58990415708046
YDL101C	10	0.0627518024448211	-0.00978653362520555	0.375107400050273
YDL102W	10	0.122425603568162	-0.000990315877196964	0.290203934746801
YDL103C	10	0.000407985864003238	-0.0264340119283188	0.99274535342216
YDL104C	10	-0.0174112482025856	0.0193372711151967	0.719616033018028
YDL105W	10	0.0992016779409219	-0.00522279181056365	0.266788669207055
YDL106C	10	-0.00644869332720428	0.00815716521252578	0.888075761322681
YDL107W	10	0.0168700209362478	-6.80297305404877e-07	0.722280943642339
YDL108W	10	0.089896764818308	0.00388309235963792	0.197526472799068
YDL109C	10	0.000999964125061682	0.0019513997593675	0.962749232373659
YDL110C	10	-0.0842195706952649	-0.00161509583331615	0.517196684574245
YDL111C	10	0.000536308362650609	-9.87543913801726e-05	0.995300721582562
YDL112W	10	0.117492231365767	0.000323162905827589	0.363043132720781
YDL113C	10	-0.0336043593612845	0.0260435014923911	0.707418587005931
YDL114W	10	-0.162292823750206	0.0165757239306869	0.1704093854299
YDL114W-A	10	0.133518130633685	0.0224987048559769	0.273927733663395
YDL115C	10	0.0041937625171608	0.0144856641478736	0.929872000445965
YDL116W	10	0.115720323214322	0.0342872029103471	0.134692835495175
YDL117W	10	0.065642854509093	-0.0266078322370291	0.456558091637194
YDL118W	10	-0.00329853069436512	-1.13374181175152e-06	0.941677098086752
YDL119C	10	-0.0358671954609715	0.052388867339195	0.624440373289363
YDL120W	10	0.0147086511016217	0.00455071646168143	0.707522432117736
YDL121C	10	0.0874584683546984	0.0320913452434148	0.343731249371207
YDL122W	10	0.0757402488558959	-0.036145492870813	0.396567769983007
YDL123W	10	0.0346752111466775	0.0457766928153907	0.247772036739173
YDL124W	10	-0.100773489143375	0.0265526090374235	0.593542777105973
YDL125C	10	-0.0197189194443836	0.00589736838651194	0.636484402509099
YDL126C	10	-0.0104987130382849	0.00397250597393559	0.815753089149956
YDL127W	10	0.0905336820647624	-0.0177509182229411	0.456173356341623
YDL128W	10	0.00748505103905765	0.00114071683799249	0.818425771654304
YDL129W	10	0.009701247494737	0.0317967151893077	0.880657410573285
YDL130W	10	0.00828293190599283	0.05243607324648	0.823814861275588
YDL130W-A	10	-0.149661264407031	-0.000692586920669203	0.487080014638873
YDL131W	10	0.0264036163649234	0.0203019133805092	0.564121791525867
YDL132W	10	0.0676621251338595	0.0564037213440196	0.131969736594678
YDL133C-A	10	0.0511150733273722	0.131476415517511	0.86970137585991
YDL133W	10	0.0302805202114105	0.0493162822204026	0.671772857755491
YDL134C	10	0.00241888854468584	0.00213523161422479	0.916439697474727
YDL135C	10	0.0144196873965971	-0.0074744792390462	0.675239991412991
YDL136W	10	-0.0182264659169556	-0.0157579494947151	0.554066419195599
YDL137W	10	-0.00676518508829493	-0.020421700617483	0.841302329871798
YDL138W	10	0.0697810275443715	0.0083748050692268	0.330518389896973
YDL139C	10	0.0213640415975752	0.0143407889694916	0.569730480564775
YDL140C	10	0.0484772393810869	-0.0159444355741333	0.537475902226624
YDL141W	10	0.0635653032314122	-0.00711820942242056	0.393907357762504
YDL142C	10	0.00617807411821309	0.0179908572454432	0.885100844265481
YDL143W	10	0.0379879665699807	0.0301552530336685	0.618267938645036
YDL144C	10	0.0101727580032786	0.0192828268591216	0.854848125369185
YDL145C	10	0.0106454328960429	-0.0197612658670605	0.822297001930358
YDL146W	10	0.000667459629715427	0.0140724411248854	0.99304037268659
YDL147W	10	0.0343744599266918	0.0127343962950378	0.459161937374738
YDL148C	10	0.0418401879527495	-0.0320138547075269	0.74886822229787
YDL149W	10	0.0124302213505843	0.0342070081348885	0.863140974576304
YDL150W	10	0.0773378016188815	-0.0403903479128886	0.455072896865243
YDL151C	10	0.141717672460472	-0.0189541167688534	0.320295695844741
YDL152W	10	0.158289104143423	0.00155181325915692	0.384767996474264
YDL153C	10	0.061685427993319	0.0128680441234248	0.538542833773099
YDL154W	10	0.05112080403023	0.0328399047705731	0.447690902442945
YDL155W	10	0.0866155497215909	-1.52918798092066e-05	0.250645235494193
YDL156W	10	0.0856826501691443	-0.00433286710780704	0.349129547708617
YDL157C	10	0.0326191891576145	-0.0159125793931876	0.496873930130375
YDL158C	10	0.132675501710768	0.178002703985639	0.407191756944202
YDL159C-B	10	0.557042741023461	0	0.171375020829638
YDL159W	10	0.041085057957072	0.00675701297598974	0.459421423248426
YDL159W-A	10	-0.318366386893017	0.176203168369218	0.508624896888776
YDL160C	10	0.000570041293374067	0.0187243996531075	0.992098925181206
YDL160C-A	10	-0.0617937744591624	-0.0429385534100667	0.505449058808229
YDL161W	10	-0.00750340594390299	-0.00254883596674624	0.886725965773791
YDL162C	10	-0.0737525031502668	0.00681008818799786	0.600532429078283
YDL163W	10	0.116960665243335	-0.00169680629035919	0.344880653424158
YDL164C	10	0.0801060377837689	-0.000299788078304433	0.347235591073542
YDL165W	10	0.0007747375955173	0.0147962300446924	0.985310238999589
YDL166C	10	0.102495633962511	-0.00768378671620291	0.252602823905155
YDL167C	10	0.194060489588792	-0.0305071339629484	0.303359805495713
YDL168W	10	0.0895393697443408	0.0219525181596959	0.596896957909411
YDL169C	10	-0.0816183909013013	0.0858306164460304	0.661357829307439
YDL170W	10	0.0390314415195233	0.000837112719325948	0.185290125362501
YDL171C	10	0.0665818048061004	0.00125073690944535	0.130102517860841
YDL172C	10	-0.0648556864285957	0.00240937972944087	0.238615944710349
YDL173W	10	0.0829027968379771	0.0717911811705671	0.134741653985676
YDL174C	10	-0.0332155599701437	0.0161674907690496	0.607110213434314
YDL175C	10	0.0980559819362738	0.0262248711127194	0.0980657969755909
YDL176W	10	0.0950289045426323	-0.0259527066822952	0.231974370647167
YDL177C	10	0.0436068715175098	-0.0478870925735877	0.642749922650732
YDL178W	10	0.0611956501685429	0.023484229545618	0.301321823418664
YDL179W	10	0.0641021451126026	0.00880336638900255	0.522332373212236
YDL180W	10	0.0163927868503021	0.00866237086145697	0.630121625128431
YDL181W	10	-0.195465579578965	0.0048271045729679	0.249173588761457
YDL182W	10	0.107662002842526	0.0424887294657455	0.334030686611646
YDL183C	10	0.107170614700048	0.0486766328061272	0.2372737790764
YDL184C	10	-0.0206048545105584	0.0530733183947376	0.92754980463916
YDL185C-A	10	-0.0148060504922832	-0.0145785655284509	0.865080884039443
YDL185W	10	-0.0103883927950597	-0.00167708687425115	0.595777472664665
YDL186W	10	0.0210950604162205	0.0176060033336988	0.53483292519747
YDL187C	10	-0.0672991280855019	0.00750878790277279	0.640883355061084
YDL188C	10	-0.000672523950730061	-0.00635901686682364	0.965408559004768
YDL189W	10	0.0739567966350317	0.030479911765269	0.362637122886566
YDL190C	10	0.0508066855850599	0.00919782940031794	0.217559569418982
YDL191W	10	0.0274733088586518	-1.30859478863758e-10	0.434241151361899
YDL192W	10	0.00505985563757676	-1.4346976676855e-05	0.881837826574898
YDL193W	10	0.0236367640824432	-0.00954937299782198	0.550234764022879
YDL194W	10	-0.0127426539481423	0.0223158482605329	0.84067032928769
YDL195W	10	0.0336024992791563	0.0150342689131274	0.196608534058548
YDL196W	10	0.0725914195982923	-0.0360844179320255	0.566865816866162
YDL197C	10	-0.00987362638950417	0.000869209548844694	0.651165122484939
YDL198C	10	-0.0420767184437736	-0.0441512991300685	0.508550626609003
YDL199C	10	-0.0214079652783881	0.0251673075439207	0.739187421298656
YDL200C	10	0.111170619926552	0.0324581440997736	0.185713256342854
YDL201W	10	0.126381087141814	0.00443575242172066	0.284261361542522
YDL202W	10	0.0079466474592327	-0.0159824942477768	0.874067364785711
YDL203C	10	0.0666267163018027	0.00496038369857864	0.33264168749226
YDL204W	10	-0.259302817014456	0.0362157946060248	0.301808358470502
YDL205C	10	0.0374483629284073	-0.0432233759141222	0.62777197732797
YDL206W	10	-0.0689096771804806	0.00569289096977543	0.506658969688217
YDL207W	10	0.0302390816280142	0.00602029774783551	0.408490123752796
YDL208W	10	0.0441545179549104	-0.0068762482926621	0.571451723757854
YDL209C	10	0.130558666493755	-0.0146565176274923	0.26643863341232
YDL210W	10	-0.012668013568634	-0.00712024887611464	0.814302708121303
YDL211C	10	0.111763180223837	-0.0121416983465147	0.339149046692475
YDL212W	10	0.0558799324168605	0.000688584714504303	0.285018030137302
YDL213C	10	0.108133266585928	0.0560836428140333	0.14842375949156
YDL214C	10	0.241793672730762	0.191730928201733	0.104198793868434
YDL215C	10	0.0216445521544698	0.0216237929431466	0.689433520966992
YDL216C	10	0.0104510147810476	0.00446898761224982	0.815419871167616
YDL217C	10	0.0607368057078338	0.0147377153239841	0.274102082613295
YDL218W	10	0.109526290060945	0.028061513917675	0.112047241087033
YDL219W	10	0.142081830283372	0.0187342139426984	0.089304953867886
YDL220C	10	0.184238182321844	0.140672221239255	0.053303152987137
YDL221W	10	0.000874412238123852	-0.00528013846149499	0.974230454002315
YDL222C	10	0.0254317167721699	0.0574584904904618	0.846711300903428
YDL223C	10	0.0124784055766087	0.0218691916351483	0.705842042225851
YDL224C	10	0.0437037542040595	-0.000661504707875204	0.407321724762157
YDL225W	10	0.000201575877797675	0.00598669134776203	0.996245365532265
YDL226C	10	0.000129457809391526	-0.0190537120066085	0.997421076345224
YDL227C	10	0.177405511186687	-0.00227449085816568	0.396304381353466
YDL228C	10	0.0452712345343998	0.00436816763213207	0.173725701497731
YDL229W	10	0.0201397163128706	-0.0118966104313825	0.655795992324838
YDL230W	10	0.0636403236554454	0.00393199296933936	0.220358195643938
YDL231C	10	0.113071331893585	0.0597424479761302	0.172743288319511
YDL232W	10	0.109287711046158	-0.0077155695949623	0.419053611340373
YDL233W	10	-0.0531815684917357	-0.000623401278594546	0.676674306445527
YDL234C	10	-0.247243239626699	-0.0640212517671859	0.353686208076977
YDL235C	10	0.0926464766138731	0.0410507750402397	0.101909015871004
YDL236W	10	0.000903695100845382	0.00824003272507161	0.983530045448899
YDL237W	10	0.0181897532792562	-7.83676931281384e-05	0.578426004735452
YDL238C	10	-0.0226970971764453	-0.0556764607581718	0.775564961499549
YDL239C	10	0.0534333270758333	-0.000773780404161227	0.54599273547936
YDL240C-A	10	0.248840936975312	0.170151435207066	0.351114871139684
YDL240W	10	0.112694437910825	-8.09662393277885e-05	0.356019564601715
YDL241W	10	-0.253201933564426	-0.000157917008116681	0.129360597761524
YDL242W	10	0.0618502517971895	0.0325375457069463	0.339337143182298
YDL243C	10	-0.00945457504634311	-1.62863854079368e-05	0.861818590075106
YDL244W	10	-0.0730852121427023	-0.00216876754929339	0.444222723881644
YDL245C	10	-0.0063678292877657	0.00151758915150397	0.933665689727752
YDL246C	10	-0.168268514975743	-0.134776434603141	0.267602783990536
YDL247W	10	-0.0392414301670548	0.0262399044781918	0.470489238639036
YDL247W-A	10	-0.0348552529259834	0.00853827289906777	0.760719344560496
YDL248W	10	-0.0205182284355018	0.0262577393426262	0.863537676399032
YDR001C	10	0.042986906468252	0.232903244201764	0.835654463174681
YDR002W	10	-0.0240094224925151	-0.0183490626863689	0.327404527571771
YDR003W	10	0.0157761224241632	0.133888671711157	0.865626442357529
YDR003W-A	10	0.213382509628695	0.0415383110964788	0.39013243345689
YDR004W	10	0.0496534050670156	0.0179771134682321	0.248041619283963
YDR005C	10	0.041157311794993	0.0176515152035051	0.340659488547331
YDR006C	10	0.0934928189116296	0.122532843504154	0.0735535364403779
YDR007W	10	0.0283240023885231	0.110334923316794	0.771520843622733
YDR008C	10	0.00571937260762768	0.0650173233697141	0.953771152441125
YDR009W	10	-0.00308823530474456	0.0171999778536518	0.94439260595126
YDR010C	10	-0.0636454830715466	-0.0190854700203418	0.259064627951007
YDR011W	10	0.0880662328212944	0.109969214122641	0.0565772826740942
YDR012W	10	0.0224644419603638	-6.5605902936053e-05	0.740934838659984
YDR013W	10	0.178654752255643	0.0959831212831524	0.0971986491068998
YDR014W	10	0.040862909128138	-3.7741174065466e-05	0.650809420062823
YDR014W-A	10	0.141229856866165	0.182356327107853	0.214166671262187
YDR015C	10	-0.744810571340813	-0.312119508736696	0.304240142056345
YDR016C	10	-0.00401535118025101	-3.10699411401423e-05	0.897505185353227
YDR017C	10	0.101744989007668	-0.0153436972309433	0.301511150583113
YDR018C	10	-0.00729160439516349	0.0346548253239703	0.945596777985684
YDR019C	10	-0.104381037451604	-0.024328854419224	0.483734351710871
YDR020C	10	0.187373162825151	0.102723090322398	0.187126758205697
YDR021W	10	0.17875994626872	-0.0575133553436404	0.32164925219707
YDR022C	10	0.0244868444085911	-0.0221529863555269	0.714946647888713
YDR023W	10	0.0287808165236752	0.0252628600489569	0.462622352737337
YDR024W	10	-0.0229229697261172	-0.100100991053828	0.853104574994397
YDR025W	10	-0.0172845755710722	-0.0147032644326507	0.734370552325718
YDR026C	10	0.0679990929463256	0.0206947797311914	0.178452521733945
YDR027C	10	0.046463632226315	0.0156851304041321	0.188974036914509
YDR028C	10	0.0408160879637339	0.0435090963699221	0.217600681248178
YDR029W	10	0.0921386633162462	0.0298300294965108	0.322006914991748
YDR030C	10	0.0214294627461685	-0.0139068396997477	0.686422613094854
YDR031W	10	0.343202869997605	0.466266586896016	0.0058589749140966
YDR032C	10	-0.169246831869142	-0.204570094428301	0.032086798027187
YDR033W	10	0.0480654284486175	-0.042712133912568	0.525216343652419
YDR034C	10	-0.0228879460946282	0.0183458199076154	0.646196219135429
YDR034C-A	10	-0.0532997990248753	-0.00455380539676936	0.638410353147727
YDR034W-B	10	-0.166086079446706	-0.0397828930223076	0.65066083647473
YDR035W	10	-0.00988637931845577	0.00315211566110119	0.883121813429388
YDR036C	10	0.0298767818541771	0.0120368084826161	0.622447447991633
YDR037W	10	-0.00451773646517139	0.0244152012945489	0.947803705062896
YDR038C	10	0.021642061540513	0.0231888090915085	0.737475573125181
YDR039C	10	0.0504365916265224	-0.0568368813214567	0.721091116738175
YDR040C	10	-0.0549259645502333	0.0318388529090204	0.513997120724129
YDR041W	10	0.095185869686361	0.0179897461551108	0.107918519731346
YDR042C	10	0.200343289857642	0.180772379166562	0.167869684299059
YDR043C	10	-0.0021933278376445	0.0160361731902501	0.975040335652132
YDR044W	10	-0.073434353403839	-0.0472663399974578	0.18817669000673
YDR045C	10	0.0731238668912092	0.0121028503386984	0.505970729965137
YDR046C	10	-0.0668648105525607	0.0109997831809982	0.42054766190644
YDR047W	10	0.0101353752264743	0.00341023343055941	0.42285710676618
YDR048C	10	0.0710978947337445	0.0849498065854561	0.506335931068611
YDR049W	10	0.0742518127177663	0.0347437809980578	0.199489506480261
YDR050C	10	-0.0394318131399939	0.00490499113174165	0.592215719882567
YDR051C	10	0.032473672951849	0.000968035287901924	0.567501615397457
YDR052C	10	0.0825914749900592	0.00935957748355246	0.255785255118749
YDR053W	10	-0.0383990633152966	-0.000880418701093113	0.618014913760227
YDR054C	10	0.0332232454895987	0.0117524168225117	0.252362406160277
YDR055W	10	0.0448989178118946	0.0212976488617768	0.748090428333547
YDR056C	10	-0.0129916020491765	-0.0196536171507429	0.616764844525945
YDR057W	10	0.0213328924035134	0.0142771511039312	0.516827394742274
YDR058C	10	-0.107288488944662	0.015379297626612	0.416742646193018
YDR059C	10	-0.030019506323987	0.00331729048673184	0.664935086058483
YDR060W	10	0.101473375283187	-0.0373270752268844	0.44880292434987
YDR061W	10	0.00800724351785627	0.0213757702624295	0.767408460079064
YDR062W	10	-0.0239521734326548	-0.0108291005722747	0.490793028244023
YDR063W	10	-0.0188466802899527	0.00953511717791872	0.677033135000866
YDR064W	10	-0.0302048782496383	-0.0235556431863238	0.47571234294758
YDR065W	10	0.187686562080767	0.0285304161752685	0.111939387922694
YDR066C	10	0.051992412654818	0.0103825620372107	0.560544268474109
YDR067C	10	0.167074326226286	0.01868046267812	0.116194844564361
YDR068W	10	0.00964829915004911	0.0032689473382575	0.865671090790549
YDR069C	10	0.00709671672513302	0.0108654499726013	0.884795794568094
YDR070C	10	-0.0910550876061215	0.014907564003398	0.558339323991593
YDR071C	10	0.0501162981167243	0.0223045452971545	0.353869493610613
YDR072C	10	0.00597961384733211	-0.0153984387679507	0.912525383799508
YDR073W	10	0.0362437162522202	0.00840172602780793	0.308998220771495
YDR074W	10	-0.163717595862745	0.0749975320945037	0.55646966214636
YDR075W	10	0.168879823041113	-0.00182310321612498	0.207466021229006
YDR076W	10	0.0962450199385224	0.0128553018480401	0.23330231411212
YDR077W	10	-0.0150168869382735	0.0862119467605701	0.914238007318039
YDR078C	10	0.0439321831060148	0.00719738757688717	0.587012741166944
YDR079C-A	10	0.0851024448633959	0.138406305336264	0.470009084723024
YDR079W	10	-0.0534975182685402	0.0123276420825786	0.465537128798522
YDR080W	10	0.0535581084009502	0.00642348829359249	0.385490594970819
YDR081C	10	0.126871581470904	0.00198125607542883	0.1389442496117
YDR082W	10	0.0672371452136795	0.00730466396222198	0.362192021476317
YDR083W	10	0.100924259459611	-0.0253716820004557	0.40988354473425
YDR084C	10	0.0102033105298024	-0.00387526910695798	0.84814951230157
YDR085C	10	-0.109389727002629	0.005189506525269	0.324132997710209
YDR086C	10	-0.0361818693748974	-0.0290354759654444	0.43616054628524
YDR087C	10	0.0900013281834829	-2.18847516258863e-05	0.515401254443936
YDR088C	10	0.0010238192379548	-6.69366049004796e-06	0.982343128913199
YDR089W	10	0.0160777846107322	0.0774427310660506	0.819135659230501
YDR090C	10	0.0510604213084979	0.0277950353831964	0.40519830667637
YDR091C	10	0.142224768512574	-0.00779875879281386	0.263959044659569
YDR092W	10	0.0480819013272571	0.0323560683167656	0.316550430444876
YDR093W	10	0.018233016777945	-0.0070685837007879	0.53070105983935
YDR094W	10	-0.0194732602812654	0.0012198572897294	0.621206886357925
YDR095C	10	0.0237079600898153	0.0813250408327345	0.785906106204329
YDR096W	10	-0.0172649711112779	0.0337439970000297	0.8468046634106
YDR097C	10	0.108089755973167	-0.00783704043483766	0.351965993158418
YDR098C	10	0.0156140132470549	-0.00450398145145096	0.680790120224562
YDR099W	10	-0.00891185186028127	0.0164781614421707	0.741983312996044
YDR100W	10	-0.0353956503569509	-0.00469807426012139	0.598495159483688
YDR101C	10	0.202312011129137	-0.0125209007474559	0.285765127932115
YDR102C	10	-0.0899160978893143	0.00983491991085437	0.517272323313053
YDR103W	10	0.0366456459326342	0.0127100110157334	0.471595563006247
YDR104C	10	0.0622217143197266	0.00379957069345079	0.238578886971532
YDR105C	10	-0.00181875138703973	0.0111832824596273	0.946835700503173
YDR106W	10	0.00208455648662568	0.00941632137989579	0.980851573514609
YDR107C	10	0.0104935609181409	-0.0130396247244744	0.795440591883061
YDR108W	10	0.117845374460017	-0.00432634232431543	0.121410821085553
YDR109C	10	0.0908771765620762	0.0275271238875586	0.117177342455051
YDR110W	10	0.166765726656797	0.0341497056557531	0.161367898729127
YDR111C	10	0.00527055927005387	0.00601206346625579	0.911845341514528
YDR112W	10	0.0935195863922292	0.0204018792989206	0.150972283093719
YDR113C	10	0.0481039587838055	-0.0224930004908651	0.489658435085707
YDR114C	10	-0.123786386207002	-0.0626008262236364	0.30750244116904
YDR115W	10	-0.0133874176507945	0.00396859439726379	0.532345731703091
YDR116C	10	0.00864094153870218	0.0166014837168251	0.904996367804975
YDR117C	10	0.0361515871844922	0.00280287815722175	0.483922045224481
YDR118W	10	0.0695193206856068	0.012506534794456	0.383622029319799
YDR118W-A	10	0.20230451161586	0.0535075593039239	0.205481443136055
YDR119W	10	0.0361967769506842	-0.0123501965820202	0.644624136491529
YDR119W-A	10	-0.154542542780175	0.16742849370826	0.690920645687672
YDR120C	10	0.149452978790388	-0.00896060226075613	0.301363456809559
YDR121W	10	0.0495262882656457	-0.0219129290290631	0.589196887659555
YDR122W	10	-0.0340964416753607	0.0172112304799859	0.565670155928606
YDR123C	10	0.0804901115209463	-0.0027178320669863	0.537775968833428
YDR124W	10	-0.0207978571933576	0.00139291423832778	0.499642943559195
YDR125C	10	0.00604237417909041	0.00543046137914179	0.900311640891557
YDR126W	10	0.0413885494828289	0.00689990316378027	0.50280363986811
YDR127W	10	-0.00926637265147292	0.00218691835221528	0.809642908947238
YDR128W	10	0.0642370016520338	-0.0146610533472737	0.346559441601185
YDR129C	10	0.0445857747522078	0.013846083468613	0.610368089611726
YDR130C	10	0.0761500736058622	-0.00432176711642195	0.241496563040038
YDR131C	10	0.0158573235514804	0.00952928600424054	0.735188393830585
YDR132C	10	-0.0279509470711463	0.0197850801723176	0.619783972996059
YDR133C	10	-0.0436595557317544	-0.050675456797861	0.657765322924176
YDR135C	10	0.0211222740596823	0.010678440812211	0.650802919940577
YDR136C	10	-0.0260996159897882	0.0591880524001959	0.897644046266114
YDR137W	10	0.0231946351140009	-0.000115225317464244	0.759692593382434
YDR138W	10	0.0984569016726693	-2.15892593447634e-05	0.242681036353873
YDR139C	10	0.00154737660412447	0.123047247202323	0.98730136856503
YDR140W	10	0.0787255599633912	0.0156994278545001	0.257580186976348
YDR141C	10	0.0452336869320626	0.000231739506748676	0.388145977403719
YDR142C	10	-0.0470200640409173	0.00514753723176326	0.299263665464607
YDR143C	10	0.10805366097392	0.0287099438133834	0.195067090049099
YDR144C	10	0.126684567355552	-0.0148168875287106	0.283810893816246
YDR145W	10	-0.0246337587001572	0.00265957904449395	0.456372150384164
YDR146C	10	0.0133355160398985	-0.0215221993600452	0.875888019012748
YDR147W	10	0.12972745351237	0.00201004535105947	0.180265624995416
YDR148C	10	-0.0282924669196991	0.0104993860514192	0.6067548595267
YDR149C	10	-0.0935326690212249	0.0152431154586122	0.411575349020217
YDR150W	10	0.114522920806992	0.0868483873919189	0.0597382067584139
YDR151C	10	0.0073684202354841	0.01313894840437	0.857753154674928
YDR152W	10	0.0998838167294596	0.060480818788332	0.334603531698932
YDR153C	10	0.04287419251753	0.00499412199450206	0.492980004198008
YDR154C	10	0.0102602965173237	0.00442054362882182	0.915109853272197
YDR155C	10	0.0195115503573117	0.064065436673364	0.843104880040348
YDR156W	10	0.0710961833359282	0.0141420498338236	0.372893989161446
YDR157W	10	0.116136981014042	0.0354626886522469	0.469610506229017
YDR158W	10	0.00700167896590998	0.00265091293068333	0.856409731228504
YDR159W	10	0.0464324315819253	0.00988583810065976	0.43077150844708
YDR160W	10	0.0324282416950875	0.00194003416583224	0.403832183180212
YDR161W	10	0.110528668159547	0.0145891905051514	0.319827901032107
YDR162C	10	0.0200543347546127	0.00260491236539962	0.675096932337895
YDR163W	10	0.00576874364687066	-0.00202245857316646	0.812845206395859
YDR164C	10	0.019433101350096	0.0036623602659311	0.748675833876771
YDR165W	10	0.21066079960929	0.0630129025510025	0.219239945696228
YDR166C	10	0.0434306762512003	0.00608826941951808	0.518065496312208
YDR167W	10	0.071440231961169	-0.00140650852441032	0.303628295639651
YDR168W	10	0.0553305972572927	0.00954685476166741	0.506687293584277
YDR169C	10	-0.00706679531298061	0.0312948301509701	0.886438750417099
YDR169C-A	10	0.032478340361564	0.019324522922211	0.757039859011389
YDR170C	10	0.0503196951308808	0.00569027405802653	0.321099175860798
YDR171W	10	-0.291468035154219	0.02262635627008	0.335179880586973
YDR172W	10	0.0610582502082192	-0.00990073445716975	0.487517017133433
YDR173C	10	0.0947826775250085	0.0373961532761307	0.178638436433047
YDR174W	10	-0.010647242900111	-0.00204986645601865	0.808447823241833
YDR175C	10	0.0193674636964621	-0.0323836798642602	0.761940557118626
YDR176W	10	0.00155954476361725	-0.00842431840409628	0.964426550623008
YDR177W	10	0.000355043322766899	0.011876899041872	0.98919605613212
YDR178W	10	-0.143282133685742	0.00196987362759024	0.257199629366541
YDR179C	10	-0.0491597309584612	0.00288325003605385	0.684722745053733
YDR179W-A	10	0.179060852674154	0.0511928477781663	0.239444339864911
YDR180W	10	0.133058689223295	0.0645429314094875	0.400801148394373
YDR181C	10	0.0455240891854631	0.00404254701997236	0.401359042547835
YDR182W	10	0.00308978141939923	0.000137257368700712	0.871268730573301
YDR182W-A	10	-0.0370108173591659	0.0136511210739436	0.766441376188741
YDR183C-A	10	0.167040087213464	0.0212282841409375	0.313022951511334
YDR183W	10	0.0975120868865837	0.0183806153909664	0.212543324277997
YDR184C	10	0.22418892631197	0.0476909292863946	0.19740966822704
YDR185C	10	-0.0201904028858416	0.00795325585194059	0.582550186577463
YDR186C	10	0.0254374782237833	-0.000160139874638631	0.642296235299123
YDR187C	10	-0.0375386080748544	-0.0299386746783265	0.62330599208797
YDR188W	10	0.015710318039886	0.0252854084409884	0.790418127496237
YDR189W	10	0.0266914780507621	0.0152966337115105	0.701852002559861
YDR190C	10	0.0340623882959944	-0.0381509541144966	0.637150950188086
YDR191W	10	0.113679008799912	-0.00338921077804325	0.279788603447147
YDR192C	10	0.14479372322157	0.0594066977002696	0.194331811927827
YDR193W	10	0.0448889497388383	-0.00465178043554799	0.448580823283011
YDR194C	10	0.142118777529022	0.0043555859938553	0.157430313097604
YDR194W-A	10	-0.518176002083778	-0.0616992050274177	0.101369646203331
YDR195W	10	0.148917132438654	0.00981753545736107	0.256431215190655
YDR196C	10	0.0702346230194706	0.00786080982375459	0.392890917187471
YDR197W	10	-0.00826023718813793	0.00464001131158737	0.74438059711299
YDR198C	10	0.210257011727937	0.0741736845740974	0.0893740481832775
YDR199W	10	-0.0182350159107178	0.0231237526467545	0.84626664773092
YDR200C	10	0.0574331176647182	0.00576317967617016	0.306558697823103
YDR201W	10	-0.0144205884123657	-0.0281579819253743	0.607961356297142
YDR202C	10	-0.0677906285893764	0.00381614696882244	0.290618952286105
YDR203W	10	-0.0121895028379417	-0.000285905228712954	0.886172595135967
YDR204W	10	-0.0770690544484669	0.0028391916232509	0.390211838114248
YDR205W	10	0.0704477723172584	0.005845243885358	0.182541081186802
YDR206W	10	0.122953388851982	0.0438695437445307	0.170787274803185
YDR207C	10	0.0140284906871489	-0.00502939892868116	0.732723870872794
YDR208W	10	0.0182557023164347	0.000641684613710283	0.63143586708775
YDR209C	10	-0.0314569242386159	0.0122973639181382	0.809236625905398
YDR210W	10	-0.757418529003364	-0.108387434241061	0.386474711500138
YDR211W	10	0.144042469521492	0.0123557310095387	0.149394919046226
YDR212W	10	0.0394826647241745	-0.00957355260355177	0.568084145508659
YDR213W	10	-0.092164168556828	0.0167402648759454	0.43352892610451
YDR214W	10	0.0396584011945635	-0.00359717949425351	0.676541902040227
YDR215C	10	-0.013712367551214	0.189585324703192	0.936722882003553
YDR216W	10	-0.0133000327056888	0.0300356966658798	0.911501881915816
YDR217C	10	0.144206268351988	0.0168956576448707	0.168844776929228
YDR218C	10	0.0471293465505022	0.0173110447242285	0.486369544465525
YDR219C	10	-0.0157719059371386	0.00116246372911499	0.752053069158129
YDR220C	10	0.224701685357502	-0.0121777096278087	0.356523874825307
YDR221W	10	0.0459268858259733	0.00520815555207537	0.188457942877184
YDR222W	10	0.0624124184129578	0.03063840888702	0.389629767163343
YDR223W	10	0.0669970402417653	0.013256249064726	0.159077648522542
YDR224C	10	-0.0329382848800534	0.00347644645518753	0.459677882458827
YDR225W	10	-0.0452739214874017	0.000634176376094748	0.302343248899117
YDR226W	10	0.00302848590796282	-0.00461088238174281	0.959716775924759
YDR227W	10	0.0700724217686626	-0.0154110649970618	0.365470162742108
YDR228C	10	0.104246980591881	0.0111665522738409	0.361694632151123
YDR229W	10	-0.0133497028287485	0.00931110951241742	0.739874928899523
YDR230W	10	-0.0220827595185159	0.0731199625612895	0.820252381589661
YDR231C	10	-0.0631760702773619	0.022209742289908	0.380402451402337
YDR232W	10	0.0299015809629488	-0.00329267570961495	0.602095740342398
YDR233C	10	0.0234046014204913	0.01379221967483	0.472091319227344
YDR234W	10	0.0143957610548138	-0.00740540046474013	0.768984415336282
YDR235W	10	0.105138919690999	0.0200431092030041	0.247699889135826
YDR236C	10	0.00839180585882946	0.0226087872068923	0.799676245453317
YDR237W	10	0.0131342138181617	0.0467570119766256	0.823549698099606
YDR238C	10	-0.0870923564906284	-0.0173144485800385	0.152142498565928
YDR239C	10	0.0644323664277157	0.00771304701783576	0.245827844408116
YDR240C	10	0.0944915299251778	0.00682715237412658	0.368639646799994
YDR241W	10	0.0297718980169678	-0.000593830264281281	0.85021487346759
YDR242W	10	0.0027960892879471	0.00176985118673378	0.935315182213958
YDR243C	10	0.0992753589221423	-0.000329903780119671	0.343378019167468
YDR244W	10	0.0315794550964526	0.0125993687952946	0.509862678618388
YDR245W	10	0.0587538207799989	-0.0119359917863015	0.44837716343632
YDR246W	10	0.0501491396735822	0.0422175765174252	0.373140079004063
YDR246W-A	10	0.0865836767943947	0.0689023017003361	0.278453908816742
YDR247W	10	-0.154928758752898	0.00229752479408369	0.292262452911353
YDR248C	10	-0.13725135872336	-0.151988837780137	0.177492105189732
YDR249C	10	0.041032204234339	0.0620189808501357	0.650374478698783
YDR250C	10	0.00562665544284	0.0364874971768285	0.968817258132896
YDR251W	10	-0.0856103828944813	0.00374900403988286	0.393018090731399
YDR252W	10	0.0141063574934708	-0.00664727136059528	0.615756092148279
YDR253C	10	-0.0561542955960228	0.00402338804681542	0.245970972306911
YDR254W	10	0.0228528586406276	0.0165328970795414	0.629292846875532
YDR255C	10	-0.0661352392962222	0.0192627203827415	0.518055734489351
YDR256C	10	0.0396711586670543	0.0292785665418816	0.658266629954759
YDR257C	10	0.0729775178137998	0.0104696251901824	0.382046339549063
YDR258C	10	-0.286213735780099	0.0357304123904362	0.344903525297128
YDR259C	10	0.0714490526321177	0.00138464184176625	0.394804796427802
YDR260C	10	0.0154868445464405	0.0023641790592065	0.750791890078128
YDR261C	10	0.0453930344650082	0.0269938184198708	0.134602235739728
YDR262W	10	0.0274284745585973	0.0431135313254827	0.662110884956873
YDR263C	10	0.0678832224957683	0.0430770979878113	0.506524665898209
YDR264C	10	0.0948974632897432	0.0030321035641978	0.152841670647752
YDR265W	10	0.0375573476793923	0.0237450429462171	0.383486474114705
YDR266C	10	0.0213163802994454	0.0169908514842727	0.702245642289811
YDR267C	10	0.030303165993188	-0.00954767413052285	0.601971856608103
YDR268W	10	0.0203315967806178	0.0229102175511955	0.795920038980784
YDR269C	10	0.0801545069393883	-0.00416137488621116	0.455716215714565
YDR270W	10	0.129626280402298	0.02556474546459	0.222844120892131
YDR271C	10	-0.0259282969412269	0.0316702475285125	0.760957151374092
YDR272W	10	-0.00831198562741728	-0.026482558794586	0.85942880522389
YDR273W	10	0.0441568177630407	0.000973712043860389	0.58922415493383
YDR274C	10	-0.00835365549697336	-0.0564394104848882	0.969605118458428
YDR275W	10	0.0676372485848757	-0.000709103590414752	0.340187999793545
YDR276C	10	-0.0172086690714895	-0.00432250026629362	0.718085716406904
YDR277C	10	-0.0542854140291617	0.02829517031798	0.72983741320692
YDR278C	10	-0.0118733938972332	0.0324451537416431	0.958093346503618
YDR279W	10	0.136864592804168	0.0537628021501131	0.25054414821658
YDR280W	10	0.0459412518568578	-0.0668451332071918	0.63973628821634
YDR281C	10	0.0930605426381263	0.063758229753509	0.552778236460997
YDR282C	10	0.0404207691452724	0.0118930015352432	0.56122248064236
YDR283C	10	0.0523073265646037	-0.00196732065698067	0.45213087501616
YDR284C	10	-0.0109212266032195	-0.00746862231419827	0.802652593451963
YDR285W	10	0.0191109632186775	0.0275297200484836	0.792843633757683
YDR286C	10	0.0332705054855579	0.00699140350656581	0.470587395631797
YDR287W	10	-0.0117463209933491	0.0143744626011423	0.784921850110402
YDR288W	10	0.0522728199090731	0.0016408199578507	0.219318676974987
YDR289C	10	0.0612854915516031	0.0287570307421846	0.277963548619131
YDR290W	10	-0.149051388768889	-0.0415236996995423	0.706103968986431
YDR291W	10	0.0736771851873513	0.0364258789395135	0.252121324003501
YDR292C	10	0.0306007335192306	0.0420731628960933	0.709078044237762
YDR293C	10	-0.0173519089775648	0.0507370833546422	0.832503081734712
YDR294C	10	0.0391077854116925	0.0538715212377777	0.433178791316334
YDR295C	10	0.0325457337150703	0.0234775989850002	0.35909096431226
YDR296W	10	0.0115633702439036	0.0062485853194559	0.738449900845688
YDR297W	10	-0.0075588114101209	-0.0469084680176545	0.870621901840445
YDR298C	10	0.0271294860758531	0.0106859720233214	0.567900380172804
YDR299W	10	0.284798031197315	-0.0126835724544918	0.217926263293789
YDR300C	10	0.0828352850077563	-0.0178685189432163	0.41487625409001
YDR301W	10	0.0444334654029961	-0.00342254515046827	0.407489160808358
YDR302W	10	0.0347056068655391	-0.0241358336243806	0.654941132216075
YDR303C	10	0.0197693127348847	-0.0662717767795106	0.833015529123127
YDR304C	10	-0.040468327480505	-0.0221389990601181	0.522986139715184
YDR305C	10	0.0105010910975701	0.00868215369863519	0.766722014511171
YDR306C	10	-0.0468066401390298	0.00324536010404659	0.356521623117084
YDR307W	10	-0.000116301463198246	0.0202953216196297	0.997666148390752
YDR308C	10	0.0199138239714416	0.00649166482938078	0.647299965918949
YDR309C	10	0.073611614909414	0.00267929912543401	0.271265439028995
YDR310C	10	-0.013333146243941	-0.000942776685325847	0.780977628124645
YDR311W	10	0.0172709111620003	0.0248587354657635	0.763212105561116
YDR312W	10	0.158068919586283	-0.0154244596976013	0.283958352768057
YDR313C	10	-0.0720647759311758	0.00227986336280277	0.242904928349874
YDR314C	10	0.0948401563988847	0.0584315346781488	0.177353581584369
YDR315C	10	0.055934502691034	0.0435121314737696	0.326744566808767
YDR316W	10	0.0113160130181096	0.00805971586419783	0.845133872485203
YDR317W	10	0.0267792636339755	0.0164486410106629	0.556499452094268
YDR318W	10	0.038930527541107	0.0207588201861477	0.327686827545742
YDR319C	10	0.0329467339439708	-0.0071479663483888	0.733218524171865
YDR320C	10	0.0575447475899608	0.0438777185285055	0.0747620482710866
YDR320C-A	10	0.0211513135397276	0.0021464471245988	0.743894994527012
YDR320W-B	10	-0.0846142044650355	-0.0600922534026925	0.617692888910774
YDR321W	10	0.0873290880640426	0.0235730474290003	0.236780801466948
YDR322C-A	10	-0.0196847467729897	0.00840831027891506	0.718658538377477
YDR322W	10	0.028250479073876	0.0126252093094672	0.649793230393582
YDR323C	10	0.0465595791452726	0.0212042470143285	0.325032048268312
YDR324C	10	0.165669236236839	0.0247614532863073	0.322022101695185
YDR325W	10	0.0482339350307719	-0.0532745443023392	0.606676313767313
YDR326C	10	0.0357922295396162	0.00110231053858705	0.570118970197898
YDR327W	10	0.0202654121224563	-0.00216981766686557	0.668358174512209
YDR328C	10	0.0171331243157198	-0.0260335996528083	0.748956480165494
YDR329C	10	-0.0270782654076624	-0.00820606728630061	0.564405000672909
YDR330W	10	0.00947678179655493	0.0272471008463166	0.85186559933467
YDR331W	10	0.0345704915495312	0.0119281000907753	0.55845619385322
YDR332W	10	0.0138556935224115	0.00348590768995457	0.74287860208615
YDR333C	10	0.0899787937032309	0.0068755330168105	0.231404987772656
YDR334W	10	0.0751606362052427	0.000171400003806691	0.133264219394316
YDR335W	10	-0.0117109438918894	0.000608130219465596	0.815601764282473
YDR336W	10	0.097588243121968	0.0150648185181565	0.209150658117242
YDR337W	10	-0.0146169738807008	-0.00982585710605169	0.758087838116069
YDR338C	10	0.00721600927190454	0.000336223740364354	0.679087925408709
YDR339C	10	0.14944348209755	0.0108246979062647	0.20185136911999
YDR340W	10	0.0898722154022824	0.139370778228942	0.459506326684399
YDR341C	10	0.0190354213083531	0.00437132793449483	0.623738746401828
YDR342C	10	-0.0874454599170923	0.0717436704080015	0.76023005286322
YDR343C	10	-0.210247033346238	0.0360268643123256	0.440029016639879
YDR344C	10	0.00667468429408517	-0.00853506842357223	0.926490537344937
YDR345C	10	-0.000578662618835152	0.00286060814797471	0.994494484983952
YDR346C	10	0.0798548257857328	-0.0227140673215539	0.423773972921386
YDR347W	10	0.0370539863508022	0.00539396772804306	0.280086189117628
YDR348C	10	0.00853154608028295	0.00573547122092966	0.830854271406889
YDR349C	10	0.0249628515842371	0.0083630335861642	0.592553272919109
YDR350C	10	0.0361770488873706	0.00937300221369784	0.376220019098439
YDR351W	10	0.0393591851765911	0.00265433130658066	0.562298307173125
YDR352W	10	0.0394931029876882	0.000577606337430334	0.404505009234186
YDR353W	10	-0.0276670456515269	-0.00234998559192902	0.606106284396
YDR354C-A	10	0	0	NaN
YDR354W	10	0.0646274532378956	0.00623799039683045	0.18327303625773
YDR355C	10	0.0101891912192128	-0.00250665376337581	0.86135411431793
YDR356W	10	0.0169965230258526	-0.00208456267064943	0.715850036618529
YDR357C	10	0.0212828133095525	0.017434046338252	0.725142606083486
YDR358W	10	-0.149302520146691	9.51825502641794e-05	0.336104081672852
YDR359C	10	0.0209924756716446	-0.00136085034821178	0.727049715105688
YDR360W	10	-0.0300427100758477	-0.0122486457085457	0.659251624431971
YDR361C	10	0.0774048442236504	0.00421158193224399	0.516281984131409
YDR362C	10	0.0856185925702048	0.0106338199277534	0.198428434434558
YDR363W	10	-0.015182268532809	0.00709600210240934	0.657072845634089
YDR363W-A	10	0.00638216234440195	-0.00105722324282352	0.920494345128301
YDR364C	10	0.130872732845759	0.00500776435611644	0.187096575470906
YDR365C	10	0.142714130903099	0.071782221950156	0.261213597698787
YDR366C	10	0.171118260494455	-0.00994031058929105	0.410631192129124
YDR367W	10	0.107661395055529	0.0615740684059879	0.208219379427504
YDR368W	10	-0.0339859295136558	-0.0467691861663601	0.609739027087703
YDR369C	10	-0.00485157527994616	0.0100733949707915	0.943075017890512
YDR370C	10	0.156558900318351	0.015457702266434	0.249914890541363
YDR371C-A	10	0.87311816020741	0	0.17028513549475
YDR371W	10	0.0510570117703036	0.0074516955747123	0.353738265052164
YDR372C	10	0.0944859956203403	0.0587739518312097	0.260496901170759
YDR373W	10	0.0552850352451341	0.0317344114325857	0.29007577129124
YDR374C	10	0.0537763404634588	0.0189167552923888	0.518212713744153
YDR374W-A	10	0.0112854844179032	-0.00968865316003814	0.759121064664602
YDR375C	10	0.0315865341339475	0.0321693166871512	0.605741216544604
YDR376W	10	-0.0400179329090108	-0.0389376648834121	0.455237606521329
YDR377W	10	-0.0187634792964998	0.00866134120704429	0.699892141179718
YDR378C	10	0.0152545406130392	-0.0103548457346473	0.687856708029987
YDR379C-A	10	-0.156958479171933	0.03315262951547	0.361970379029076
YDR379W	10	0.0463901671785522	0.0304848714334212	0.178986468693747
YDR380W	10	-0.0686984362028012	0.0121748224782437	0.337390632626425
YDR381C-A	10	-0.0234908527164218	0.0142606138243663	0.736440205159905
YDR381W	10	0.025048071073669	0.0335328903962863	0.601183993446997
YDR382W	10	-0.0146010809550654	-0.0222929340169734	0.630003869595509
YDR383C	10	0.0243825498119992	0.00726095909735549	0.414090438047575
YDR384C	10	0.0223443949325292	0.00704566225328089	0.771000674578043
YDR385W	10	0.0135496494858648	-0.0251881726076955	0.791379683626763
YDR386W	10	0.0328913846507672	0.00892517897165009	0.456783806660258
YDR387C	10	-0.0111106129457712	0.00843504166334349	0.775462370684415
YDR388W	10	-0.036400439239857	0.0105151237975117	0.542383649253024
YDR389W	10	0.0184525718707095	-0.00738260827375933	0.75850642304065
YDR390C	10	0.0429467860050929	0.0032978478893562	0.30713963454532
YDR391C	10	-0.050841686003681	0.0181019546593766	0.709050467997696
YDR392W	10	0.0305730219066743	-0.00246329701911444	0.370629093054878
YDR393W	10	0.0468928648041118	0.00744439360787285	0.27064393631581
YDR394W	10	0.0380128484882619	0.038140495989804	0.621167571167701
YDR395W	10	0.0541408330927876	0.0108161327922895	0.544904961795175
YDR396W	10	0.116178138662372	0.0305118648939955	0.224086965298882
YDR397C	10	-0.00332318605772091	-0.00182194551883348	0.940200210898388
YDR398W	10	0.135761090909676	0.00879765169408671	0.374276637893824
YDR399W	10	0.222988596192627	0.0539749175423896	0.242825821965656
YDR400W	10	-0.011756775735661	-0.0147857928121446	0.806876414330332
YDR401W	10	0.0790808985302114	0.0429890687025177	0.611285988652097
YDR402C	10	0.128020803253864	0.128967240567213	0.246844281348697
YDR403W	10	-0.0141370764495304	0.0121172224706183	0.705514904207132
YDR404C	10	0.00833968711976953	0.0299430989588904	0.826997713470728
YDR405W	10	-0.0125694780723665	0.0279798139644743	0.826287240504651
YDR406W	10	0.00949550298992559	0.0160858746679114	0.893657393532047
YDR406W-A	10	-0.124833094875208	0.0817248405375999	0.687527520244421
YDR407C	10	0.0331060488955599	0.0128449186741896	0.673122785539887
YDR408C	10	0.0433679382705327	0.0312266428265107	0.634295172858051
YDR409W	10	0.0771362297652509	0.00775795036791169	0.135267440767771
YDR410C	10	0.0695073396270314	-0.00328377438838393	0.293350255831307
YDR411C	10	-0.0226001001855447	0.00664749334890909	0.555402825056445
YDR412W	10	0.016843940669592	-0.0545097022229958	0.864347895623855
YDR413C	10	0.083786675948655	0.0338411956174647	0.395667650793872
YDR414C	10	0.113834409792947	0.0350235422679687	0.173700531980534
YDR415C	10	0.0190273638870182	0.00984631664345101	0.6064357133034
YDR416W	10	0.0719877515022147	0.00263566987098626	0.369245447457178
YDR417C	10	-0.0143031587696473	-0.00705337949679342	0.567395213076083
YDR418W	10	0.0214500691947301	0.0109448657116074	0.643586514959182
YDR419W	10	0.0558638649818812	0.0156512427246294	0.363832709971768
YDR420W	10	0.00343485997863926	0.00424371755126458	0.950401060030307
YDR421W	10	0.0598014635031592	0.00775549468437536	0.170790172141781
YDR422C	10	0.121717238055292	0.0570114917380871	0.0665761041551218
YDR423C	10	0.023746206788265	-0.0148714011114804	0.506084248062222
YDR424C	10	-0.0285383507009913	-0.0138687540114496	0.353891690325767
YDR425W	10	0.0489007110139474	0.0121216887828317	0.481994108562736
YDR426C	10	-0.0671129056532076	0.0325078725161317	0.496558817482333
YDR427W	10	0.198633152898632	0.144754515317147	0.0683152847683141
YDR428C	10	0.0592279131418818	0.00352821136775158	0.385503266175044
YDR429C	10	0.0417679255300836	-0.000901685608008263	0.499975727688184
YDR430C	10	0.0740911037601264	0.0439840396833821	0.230481455850307
YDR431W	10	-0.00679027843084709	0.018633835785505	0.940430270425486
YDR432W	10	-0.00161020122260775	0.00893662457142049	0.946344459516275
YDR433W	10	-0.0774906733546807	0.0104780474103747	0.392175364527511
YDR434W	10	0.0189830624666801	0.0147744265505037	0.787964605660405
YDR435C	10	-0.0255413868708117	0.00140045389628345	0.779595201529347
YDR436W	10	0.0104766872887327	0.0213950793476184	0.897647223038514
YDR437W	10	-0.015316436228929	0.00570177046658229	0.597161159813696
YDR438W	10	0.0193349687656156	0.00154936372543553	0.483664347454421
YDR439W	10	0.00761443540585723	0.0166029146116446	0.900924652210412
YDR440W	10	0.0299212012815897	-0.0104713703377714	0.703429335656213
YDR441C	10	0.0365744982042884	-0.00771498482126805	0.606211071030049
YDR442W	10	-0.0598165311472533	0.00298933520397422	0.355925046816533
YDR443C	10	0.0395165826481104	0.0118864676298659	0.283488474177204
YDR444W	10	0.0216251019481515	-0.0134649331026265	0.65120709569402
YDR445C	10	0.133737617233861	0.0373645308703413	0.548539906233408
YDR446W	10	-0.0137945958998625	0.0165617367052418	0.839821299788135
YDR447C	10	0.0213842189649649	-0.00475491504169368	0.621840459173187
YDR448W	10	0.0345011953376434	-0.00144812525103573	0.547499942271557
YDR449C	10	0.288836680313502	0.123118927116457	0.161097858387893
YDR450W	10	-0.0149440871853402	-0.0105800994295173	0.596572234990061
YDR451C	10	0.117226719100968	-0.0279584613731811	0.385971026418499
YDR452W	10	-0.0444569376383084	-0.0507611115837371	0.283983958967677
YDR453C	10	0.10483283898763	-0.00118224829507978	0.599807251701243
YDR454C	10	0.00961151647633835	-7.41416470219055e-06	0.775732068061175
YDR455C	10	-0.00152018817706016	-0.00671111408642237	0.988222834009135
YDR456W	10	0.0557134601147474	0.0267872986985318	0.073244519079687
YDR457W	10	0.0268641181352013	-0.0189743689529761	0.534266524273401
YDR458C	10	0.0467715641420746	0.0227828313588413	0.303667052410969
YDR459C	10	0.0860302699808006	0.011068479475255	0.368762583592925
YDR460W	10	0.0121562232143993	-0.00447688816308987	0.77629361598183
YDR461C-A	10	-0.125771699320667	-0.0424937022657823	0.184316803049245
YDR461W	10	-0.0954497975287155	-0.142562425062256	0.788205148785402
YDR462W	10	0.00270200670823428	-0.00100207992499573	0.896510678292154
YDR463W	10	-0.00678433034277784	-0.0106557631578776	0.814783543201687
YDR464C-A	10	1.25835758268951	0.749855108036882	0.0193559059561796
YDR464W	10	-0.00494308583994638	-0.0501970026977177	0.942602226505514
YDR465C	10	0.0403114355967913	-0.0168988990569322	0.71632903737182
YDR466W	10	-0.00784560157745034	-0.0278981956658529	0.840501024610731
YDR467C	10	-0.000977912638605688	-0.00502845172005679	0.981546213454647
YDR468C	10	0.0287703463435975	0.00762568547802826	0.382693085182719
YDR469W	10	0.0361893969279135	0.00415892077211002	0.745443019744803
YDR470C	10	0.0147982302126927	-0.00475788619275272	0.799773778271099
YDR471W	10	0.0328253436886472	-0.0056370504526844	0.510188441231169
YDR472W	10	-0.0145170755343457	-0.0544866810550291	0.837609546204501
YDR473C	10	0.0358941054984749	0.0506710141158044	0.499412296306796
YDR475C	10	-0.00843885649961993	0.0892762529814195	0.943307655486685
YDR476C	10	0.0877515055212769	0.0716991804179221	0.0452872779969397
YDR477W	10	0.0145481324497116	0.0101866750153576	0.424511426075419
YDR478W	10	0.00238215725648278	-0.0197094738246287	0.972262947557225
YDR479C	10	0.0349232954444903	0.0477239835269366	0.281854874049268
YDR480W	10	0.0325123090480266	-0.00010263504473578	0.514544012704862
YDR481C	10	-0.0569777633105167	-0.0538596801932941	0.0695451634222837
YDR482C	10	-0.0512389935661264	-0.0401269521709923	0.179612187820358
YDR483W	10	-0.0397351301148004	-0.0394287156756193	0.248626860141071
YDR484W	10	0.0433049736208561	-0.0240525101622512	0.571691142045982
YDR485C	10	0.164882400082714	0.149551259941977	0.000221183214157818
YDR486C	10	0.0912512339126305	0.0993017620971281	0.144902283918414
YDR487C	10	0.0208394628565074	0.0273557094402218	0.288467522812997
YDR488C	10	-0.24407260044913	-0.329373299544997	0.0152841618867148
YDR489W	10	0.140630854907649	0.054550645103529	0.166226941898131
YDR490C	10	0.0547959535367395	0.068972780889778	0.118214157484814
YDR491C	10	-0.600586023051105	-0.705951280971236	0.0187411711343035
YDR492W	10	-1.60091310082041	-1.83118776679515	1.777552917223e-05
YDR493W	10	-0.0689420610528124	-0.0593793895033485	0.0209365447418629
YDR494W	10	0.0429720532712371	0.0199036678261846	0.419143064021557
YDR495C	10	0.17516458337663	0.111653198142755	0.0359430006884877
YDR496C	10	0.57034330125498	0.382582755363939	0.0107951732506558
YDR497C	10	-0.199797049900699	-0.25692718639308	0.060748148090885
YDR498C	10	-0.000376846081642022	-0.037166501172491	0.995288832193121
YDR499W	10	0.215904737907957	0.137295238634527	0.0188680480763882
YDR500C	10	-0.0100901996317052	-0.00711638686316621	0.79425707220797
YDR501W	10	0.088508234037522	-0.0112531731084648	0.368872926141733
YDR502C	10	-0.221009996259926	-0.282640702593181	0.221405135323385
YDR503C	10	-0.250694864043936	-0.273859648951652	0.000170453186278786
YDR504C	10	-0.100777080086906	-0.138679433568341	0.563833744719072
YDR505C	10	0.0984211538456403	0.0587440260275265	0.289223530007268
YDR506C	10	0.115693581825542	0.108152128939117	0.12981882499833
YDR507C	10	-0.0179737189683958	-0.128778073101658	0.893586765766101
YDR508C	10	-0.0952783204130846	-0.151601787807609	0.177334705394291
YDR509W	10	0.822796767136183	0.755624228915925	0.00160095792080706
YDR510C-A	10	0.497432485191049	0.384366814284325	0.0673797163161189
YDR510W	10	-0.121693173829128	-0.141312249696625	0.00148305646989682
YDR511W	10	0.0235687123896673	0.0335685426462558	0.715818138162881
YDR512C	10	-0.123476876754924	-0.170906014148046	0.0929129205236408
YDR513W	10	0.129107718671701	0.176078507215806	0.194593555294087
YDR514C	10	0.181004332735415	0.0171408759690966	0.179299191440705
YDR515W	10	0.508051651232533	0.43941912635653	0.000184443467777702
YDR516C	10	-0.0489590406516173	0.129632388537808	0.85220382930548
YDR517W	10	-0.223037342605973	-0.230664169481291	0.000523718739586739
YDR518W	10	-0.203190899528864	-0.232961985689894	0.00337026454486044
YDR519W	10	-0.288402904866511	-0.284516830298928	1.20276953758483e-05
YDR520C	10	0.215024610296572	0.107079431140422	0.0293762389138141
YDR521W	10	-0.492889517013979	-0.533516368315262	0.00018664248826225
YDR522C	10	0.41510602163123	0.390969602307385	0.00691360301549465
YDR523C	10	0.745085012995289	0.692786941068619	0.0012078751079473
YDR524C	10	0.542435171352411	0.509354276344222	6.93413865571301e-05
YDR524C-A	10	-1.51670545605523	-1.4609355358039	0.00209472943370141
YDR524C-B	10	0.002809660049119	-0.0299815263448757	0.973085211573022
YDR524W-C	10	0.895000874053033	0.365806730034735	0.057918906729811
YDR525W	10	0.317265206895572	0.301515977269956	0.0211516794752963
YDR525W-A	10	0.21266211618647	0.357982722116284	0.258694702857057
YDR526C	10	0.122829234939803	0.129286000960104	0.115784682246237
YDR527W	10	0.168060780698947	0.0689165749865221	0.0857850155486406
YDR528W	10	-0.144737307854118	-0.311753454723059	0.379792377832377
YDR529C	10	0.37597637882176	0.343364020644472	0.00118780926514824
YDR530C	10	-0.0395549887819579	0.010664089949795	0.47691260096744
YDR531W	10	0.134379048652285	0.185560724319831	0.158563263725248
YDR532C	10	0.1706492158811	0.203446658678657	0.00303925239056655
YDR533C	10	0.134327007057493	-0.124277115661547	0.686807107978028
YDR534C	10	0.411176108057889	0.40289673540735	0.0001958700370724
YDR535C	10	0.161849608283253	0.244300376638335	0.155548015256676
YDR536W	10	0.440022520106182	0.346849158389791	0.000464763459745777
YDR537C	10	-0.122293206809798	-0.164435819373598	0.100004690802859
YDR538W	10	0.161199129380199	0.124339876836761	0.00124418553534681
YDR539W	10	0.0512552619841599	0.0501584100647336	0.237253894168056
YDR540C	10	NaN	NaN	NaN
YDR541C	10	NaN	NaN	NaN
YDR542W	10	NaN	NaN	NaN
YDR543C	10	NaN	NaN	NaN
YDR544C	10	NaN	NaN	NaN
YDR545C-A	10	NaN	NaN	NaN
YDR545W	10	NaN	NaN	NaN
YEL001C	10	0.0129012193979667	0.00211202209313072	0.717081764537297
YEL002C	10	0.060361208419035	0.0407607986352412	0.0243736939453808
YEL003W	10	0.0338292728913233	0.0339574188353181	0.517051512292156
YEL004W	10	0.164561145541069	0.189240367175747	0.0168815298180608
YEL005C	10	0.01405593181441	0.0441481434142237	0.800179474580843
YEL006W	10	0.0550817404323352	0.00292147457100727	0.25870482345341
YEL007W	10	0.0416857629535782	0.0260681012635764	0.39326228759427
YEL008C-A	10	0	0	NaN
YEL008W	10	0.061974810859341	0.0392806002371311	0.455967163050935
YEL009C	10	0.0170930529681546	0.0216876909793526	0.468677655051274
YEL009C-A	10	-0.151805510673545	-0.0517409977811036	0.245138260263976
YEL010W	10	0.00426246254070956	0.0323855350322529	0.975412522652636
YEL011W	10	-0.217614345109501	-0.056621916773855	0.418718506771082
YEL012W	10	-0.0512400342765779	-0.0148799185294697	0.603596563046718
YEL013W	10	0.0103346393952932	-0.00971166212696577	0.614808590708296
YEL014C	10	0.215557045328314	0.111831609250674	0.0495355630345801
YEL015W	10	0.0918814789394108	0.040780403725515	0.263640385665297
YEL016C	10	0.0664955737471653	0.00437002327688156	0.202883550885252
YEL017C-A	10	-0.0424043523267439	-3.04218918855603e-05	0.517621829608512
YEL017W	10	0.0134144175891476	0.00963112346031965	0.629353936278309
YEL018C-A	10	0.040285080139253	0.0298497366904476	0.59395897006313
YEL018W	10	0.0558465688946047	0.0458581767782447	0.265828274821595
YEL019C	10	0.139273119997466	0.0438152691255889	0.120604377339478
YEL020C	10	0.0124946859593425	0.030216723455317	0.810314720079835
YEL020C-B	10	0.155461976591637	0.0929054535205851	0.539928730112897
YEL020W-A	10	0.0456344098407454	0.0321203529587335	0.321083108140522
YEL021W	10	-0.207325613000827	-0.225964724789447	0.212285155587679
YEL022W	10	0.134368863370344	0.0132686233740495	0.191902627880827
YEL023C	10	0.103562904111514	0.0222622534573516	0.149014910601683
YEL024W	10	0.0107556527465903	-0.0124661057706176	0.884769166689822
YEL025C	10	0.00583168250536703	0.00824522385281603	0.892250992872776
YEL026W	10	0.126439451002475	0.0227204089086803	0.173177500689281
YEL027W	10	-0.0715396061642196	-0.0884704679155535	0.0375919807292567
YEL028W	10	0.0757665301353199	0.0508963519646187	0.239610694447607
YEL029C	10	0.172976462404661	0.132909583359731	0.0937119362541485
YEL030C-A	10	0.227246491024352	0.085833823112146	0.135178386590002
YEL030W	10	0.13054914374586	0.13866530689567	0.0407069591820782
YEL031W	10	0.0758492548702895	0.036272089186998	0.299527513502441
YEL032C-A	10	0.197339851249203	0.305692145874009	0.609315098596199
YEL032W	10	0.136573401817021	0.0320775854773417	0.223112956107018
YEL033W	10	0.23750695838524	0.232062472105575	0.0661242587211969
YEL034C-A	10	0.0713918928391778	-1.04072347860407e-07	0.260089762594558
YEL034W	10	0	0	NaN
YEL035C	10	0.180186556953038	0.167252842316748	0.0360973512985217
YEL036C	10	0.0772088032125891	-0.000112939282375706	0.313519213013401
YEL037C	10	0.0808892945555301	0.0782484024719899	0.132018899771349
YEL038W	10	0.0983947170898496	0.0196717610576996	0.0923531159669964
YEL039C	10	-0.278213534044664	-0.210959023114437	0.298546506886026
YEL040W	10	0.108463195136569	0.0213726614276027	0.417744488360281
YEL041W	10	-0.00881404889797408	-5.98185765059373e-06	0.88200664198044
YEL042W	10	0.0471251703647251	0.0165022709105551	0.306811228359758
YEL043W	10	0.088540803688109	0.0644160207907563	0.0261104979004476
YEL044W	10	0.127316946001159	0.0417411365826584	0.0892576651277918
YEL045C	10	0.332209471162571	0.130251498742803	0.0515364324104235
YEL046C	10	0.123399921732164	0.0950478341101951	0.0753733111131067
YEL047C	10	-0.0126172041771025	-3.77609208307666e-06	0.693456680144701
YEL048C	10	0.308952175644717	0.118270103436939	0.121361089233523
YEL049W	10	0.127864486620734	0.10608362568935	0.105883678628824
YEL050C	10	0.0361171206884679	0.0531451212093631	0.509814921610356
YEL050W-A	10	-0.00232359141714992	0.053334895212357	0.985014381421208
YEL051W	10	0.0668167987877011	-4.33013173246552e-07	0.122348466141494
YEL052W	10	-0.0628302629671794	-0.0253953096154688	0.14634439040827
YEL053C	10	0.204438044572865	0.0925598509018704	0.0332692382397797
YEL053W-A	10	-0.0128248001300876	-4.81741562415711e-06	0.784813794338795
YEL054C	10	0.0351834099854578	0.0227694426488486	0.559620077583243
YEL055C	10	0.126479498435468	0.0399172111735225	0.258653563524853
YEL056W	10	0.0205702300129383	0.0450496448041663	0.595711149124411
YEL057C	10	0.0959404884105005	0.0998465597034986	0.286952450190632
YEL058W	10	0.00643265009125844	0.0413166566814134	0.887588474067486
YEL059C-A	10	-0.0143957723571453	-0.0974463894423682	0.918429012966241
YEL059W	10	0.0496242894485299	0.00713932799976812	0.366107087767457
YEL060C	10	-0.100055618409426	-0.00103296711893085	0.616047806376003
YEL061C	10	0.0964474977381795	0.0456892610541394	0.239297095251548
YEL062W	10	0.0111232140296379	0.0180163423430099	0.716850929733865
YEL063C	10	0.0911510897591013	0.0575300348006254	0.19785244792708
YEL064C	10	0.168066687876712	0.100042412123814	0.0766181525706612
YEL065W	10	0.367637196503974	0.0711193304229561	0.217701465260152
YEL066W	10	0.0241165612705399	0.0230882514544241	0.705622090951986
YEL067C	10	0.112561482610262	0.0152711567287278	0.183820553913507
YEL068C	10	0.0525221543182638	0.00661110707686973	0.343362655606521
YEL069C	10	0.031640514566538	0.0543140463034908	0.650738189641021
YEL070W	10	0.090284347178675	0.0236182345961328	0.089368654399619
YEL071W	10	0.00836664058032057	0.0295330333243512	0.91104868873391
YEL072W	10	0.144443332615651	0.0138720189241636	0.127167612306532
YEL073C	10	-0.00366821205898546	-0.0375697063247563	0.95688540826842
YEL074W	10	-0.0294888404260147	0.101462843580539	0.748960465067879
YEL075C	10	0.342466165860325	0	0.17861027415248
YEL075W-A	10	-0.143797357417053	-0.0979444669163961	0.59672761233342
YEL076C	10	-0.136035337435051	0.106111110867648	0.58039352214423
YEL076C-A	10	0	0	NaN
YEL077C	10	-0.0627919767218146	-0.00337618872607847	0.188144615488304
YEL077W-A	10	1.42075511161139e-05	-1.11235700171303e-15	0.117562384072196
YER001W	10	0.0939434889564925	0.0416151536631315	0.216647825560557
YER002W	10	0.178530309667611	0.0514538397764395	0.102924523619536
YER003C	10	0.0277353666829831	0.0148586627196676	0.501317396337584
YER004W	10	0.010930164852521	0.0250211890633443	0.65343393274284
YER005W	10	0.0302109860793532	0.00843321542000217	0.570216987053044
YER006C-A	10	0.407966005228052	0.354082125573927	0.0340461738781368
YER006W	10	0.202627644813292	0.0686353745200633	0.128853463775958
YER007C-A	10	0.150657980277037	0.0866189299671095	0.0818227613762267
YER007W	10	0.291432892752983	0.258988264381957	0.01243610357192
YER008C	10	0.0621155033655348	0.0153767569529602	0.172581791891105
YER009W	10	0.0305988929175324	0.0383392580501874	0.524432122633479
YER010C	10	0.069060985402477	0.168931400522094	0.264790140748961
YER011W	10	0.0824212710601252	-0.000202560486643298	0.587826539742207
YER012W	10	0.0881696370258244	0.0957776665808184	0.178739372797164
YER013W	10	0.0462086979221462	-1.55509319176017e-06	0.364984788014236
YER014C-A	10	0.252967868342558	0.265085714935716	0.0767803281001245
YER014W	10	0.023939675986259	-0.0163503754573057	0.576625358669123
YER015W	10	0.0305525348997274	0.0251122819930912	0.444902677370576
YER016W	10	0.0241691843318523	0.0163231103245073	0.563764056844674
YER017C	10	0.0433318142353389	0.0155437016268108	0.266626152754275
YER018C	10	0.0785918685099712	0.0763812470275283	0.132467465266533
YER019C-A	10	0.0175521785584647	0.0380162607741862	0.68373182955851
YER019W	10	0.0927595739378152	0.0264311635598798	0.12560086373587
YER020W	10	-0.0376399975239061	0.0776797884008198	0.786414940065496
YER021W	10	0.145038431214168	0.14446180436504	0.0363363379924791
YER022W	10	0.0914842672245613	0.0438598531405607	0.0624806257978092
YER023C-A	10	0.719929487240826	0	0.343230790422117
YER023W	10	0.0330951687147876	-0.000223953663473523	0.612251511444665
YER024W	10	0.163486051735252	0.184181693489126	0.0624145709478611
YER025W	10	0.0698855782406172	-5.9822332802691e-06	0.293346649362663
YER026C	10	0.105180010627348	0.00693955384803776	0.257932454634499
YER027C	10	-0.00948414081620845	0.0151364514374686	0.830204189887801
YER028C	10	0.112423180277261	0.0365078559683315	0.137791145610297
YER029C	10	0.0556703814356501	0.0112070867817246	0.186277771686815
YER030W	10	0.00286535410363194	0.0310761565564137	0.949694346915244
YER031C	10	0.0615626894168192	0.00641463862680254	0.249593078918208
YER032W	10	0.167524055073921	0.0751589025940593	0.154222674189416
YER033C	10	-0.0788416298355075	-0.0215439128515252	0.319689426541772
YER034W	10	0.159337618841409	0.115261795074661	0.0310619136210009
YER035W	10	-0.11981998122725	-0.00868705166545127	0.144019764107659
YER036C	10	0.0928916237898239	0.0220214455608196	0.336317468858719
YER037W	10	-0.166708564676666	-0.0123610317006913	0.504045265981327
YER038C	10	0.138345033068705	0.0612194649306638	0.184749184765291
YER038W-A	10	0.0186880712368964	0.0796958384475004	0.876449898949058
YER039C	10	0.0527779075342621	0.0324356539664013	0.542217296876523
YER039C-A	10	0.000906451337126165	-0.0457024472281835	0.993303201375857
YER040W	10	-0.00786644860440596	0.0143069513126249	0.871962531635475
YER041W	10	0.0331835753232947	0.0504163671792051	0.212099228889171
YER042W	10	0.33207949302282	0.555915229251154	0.106613540932169
YER043C	10	0.0359050370103568	0.00947549009824853	0.646417013569743
YER044C	10	0.0488528799890441	-0.000382194697196869	0.513134305676462
YER044C-A	10	0.167287026853175	0.11811651024679	0.112017067895842
YER045C	10	-0.0185885677721463	0.0149312684409629	0.714424117321117
YER046W	10	0.125335215962759	0.0860927138019534	0.0772866471538557
YER046W-A	10	-0.0290166622630412	-0.0131592249083042	0.763844516254339
YER047C	10	0.0458540839443144	0.0316556473326938	0.0491429872430241
YER048C	10	0.000400816761452645	-0.00122114359620369	0.990515563085324
YER048W-A	10	0.0575229281123924	0.0618458163241784	0.331830538255774
YER049W	10	0.140649422017709	0.00959719836267927	0.211069145787842
YER050C	10	0.010227538400967	0.00805808401530453	0.787000126988255
YER051W	10	0.039866591732118	0.0260456683539248	0.260665580602049
YER052C	10	0.00978418248446405	0.0251830987638433	0.785501782006361
YER053C	10	-0.0788457840695185	0.012180694837944	0.746398719531586
YER053C-A	10	0.0791269737938339	-0.0715649735009218	0.601386963157508
YER054C	10	-0.0755020315914687	0.0172434731203592	0.4657993827382
YER055C	10	-0.0452847655353275	0.0118948829039204	0.510355496136334
YER056C	10	-0.0238916828557135	0.0474663100963556	0.756065054818837
YER056C-A	10	0.0369754322119304	-0.00741629189466617	0.26073950362465
YER057C	10	-0.0122234029965384	-0.0147171808844874	0.762424885918707
YER058W	10	-0.065955282719486	-0.0184224402623248	0.330462180360032
YER059W	10	0.00666263557460583	0.00235569294470687	0.882801845033116
YER060W	10	-0.0164092591364378	-0.00323408406517413	0.552996386297826
YER060W-A	10	0.00891398901170175	0.0300353264342271	0.876617277852134
YER061C	10	0.18455397564583	0.230400658785804	0.166535991363433
YER062C	10	-0.043707094246538	-0.0128843565788666	0.789294158048667
YER063W	10	0.00172992826288919	-0.00534760636825958	0.960931215872832
YER064C	10	0.0384656260987608	0.0152709893994056	0.623652693386539
YER065C	10	0.253483311681667	0.134836725775986	0.10402195455414
YER066C-A	10	-0.0286662430298215	0.0227752802723845	0.930284102224698
YER066W	10	-0.0130937453639169	0.00368033078830305	0.77851842527616
YER067C-A	10	-0.376297404932767	0.0522746005094546	0.436984968268296
YER067W	10	-0.326584026755015	0.0337203247628232	0.475970232830424
YER068C-A	10	-0.036879878925818	-0.012820460145966	0.73968882324183
YER068W	10	0.0206744077949565	-0.00231757337375278	0.596259575880693
YER069W	10	0.0126157417970634	0.060468795575384	0.8706521805043
YER070W	10	0.18378380647307	-0.0225332361489311	0.369362063742111
YER071C	10	0.0295243634710728	0.0213636691936832	0.584327673555083
YER072W	10	-0.0434980760799571	-0.017909889145755	0.343170285987467
YER073W	10	-0.0209071724641992	-0.0234533301743335	0.711734734934916
YER074W	10	-0.0338338573472781	-0.0117933707765079	0.343791650033042
YER074W-A	10	0.00906540037888514	-0.0079551037708303	0.824401872706398
YER075C	10	0.00520317603647307	-0.0789181347613433	0.969345941389481
YER076C	10	0.00259031915368586	0.0243943999015119	0.947207751836013
YER076W-A	10	0.0390706074480808	0.0289198317435451	0.566062931338885
YER077C	10	0.0782690061522412	0.0046918851510702	0.253236529270143
YER078C	10	0.0334697502269131	0.00502556386303086	0.295664436082846
YER078W-A	10	-0.198491379229104	0.00486526882171233	0.317452601290178
YER079C-A	10	-0.0480015815353211	-0.00304429141893532	0.344545637254814
YER079W	10	-0.111341622523927	0.00804594244978794	0.5038237106146
YER080W	10	0.003535526456206	0.00998651371103135	0.946244400069457
YER081W	10	0.252376363625576	0.056846838172528	0.155055374985446
YER082C	10	0.144561162175382	-0.00322508630072634	0.214969070389805
YER083C	10	0.0269707172953172	0.0361881599345619	0.445316201060537
YER084W	10	0.0154129835020563	-0.028699303245059	0.785092264536935
YER084W-A	10	-0.161694623473359	-0.0606384488027492	0.549188532118341
YER085C	10	0.0388823263107599	-0.0376944250592282	0.864290976086432
YER086W	10	0.045832390271907	-0.000641011119691322	0.315287474462029
YER087C-A	10	-0.094721276928377	0.00659559753688328	0.110339563870869
YER087C-B	10	-0.0262469704614608	-0.0322710477527431	0.613754688166272
YER087W	10	-0.043148481014197	-0.0286665898144235	0.508019866200893
YER088C	10	-0.0633531779147523	-0.0109795250872813	0.379748896254395
YER088C-A	10	-0.00216312404721225	-0.0193769096738162	0.969267541388407
YER088W-B	10	0.485291678920018	0.23265494912044	0.458203568508007
YER089C	10	-0.00182017228652711	-0.00893506373036852	0.950370018001673
YER090C-A	10	0	0	NaN
YER090W	10	0.015060361300723	0.00132399806880499	0.408212604434233
YER091C	10	-0.098367130182226	0.0574518138340309	0.64966304598793
YER091C-A	10	0.0755498655070931	0.00628049518490304	0.674607216316335
YER092W	10	0.00128246244542108	0.0414207122853319	0.977103512914742
YER093C	10	0.0705751821993852	0.00850169898237795	0.228007899741489
YER093C-A	10	0.0255093570059819	0.0412130969269964	0.625416929946412
YER094C	10	0.0373169033432474	0.0272142350862083	0.492297288390975
YER095W	10	0.0465449370248121	-0.0341355033680078	0.579579567423985
YER096W	10	-0.01663342360732	0.00614097857152407	0.876681740591333
YER097W	10	0.0837988181640049	0.035060299202755	0.577208177901512
YER098W	10	-0.0483627529064892	0.018884543726002	0.657610736651513
YER099C	10	0.0342934658588971	-0.00340882782042428	0.530991674425625
YER100W	10	0.00518105520656561	-0.020144098758103	0.896258298520117
YER101C	10	0.0210313487983771	0.00194125564337854	0.606703622039493
YER102W	10	-0.0221893117062599	-0.0361415234715147	0.660996005062492
YER103W	10	-0.0886052503896608	0.0246245728233789	0.820189129317752
YER104W	10	0.0524423232802374	0.00512260414622126	0.15860233493907
YER105C	10	0.119221792804502	0.0159520528224007	0.116797137356482
YER106W	10	0.00784454217148742	0.0323168216218634	0.900662540788941
YER107C	10	0.0995831880901439	0.00886969837122119	0.195743151142696
YER107W-A	10	0.146509596199752	0.0582543420510454	0.123326557864336
YER110C	10	0.124405926311445	-0.00229509135462691	0.309503313896803
YER111C	10	-0.0368314293968729	-0.0742732079074395	0.739408579157772
YER112W	10	0.160676217902739	0.0833420082735008	0.0715658533544942
YER113C	10	0.136448046260115	0.0351955655700852	0.214855728468305
YER114C	10	0.0415532768657648	-0.028821150585851	0.568318256473521
YER115C	10	-0.00557507079349825	0.00596922922713162	0.905413474264882
YER116C	10	-0.00602160649383082	0.0109017913050771	0.854478402377804
YER117W	10	-0.0250382746618911	-0.00100326007850832	0.529793062175745
YER118C	10	0.0821697623755478	-0.00602565719579175	0.336914327909293
YER119C	10	0.010883199544636	0.0170487961238832	0.784105186166523
YER119C-A	10	-0.0336063224452279	0.0591682951497794	0.800660032017333
YER120W	10	0.00788977730154331	0.0104089173980062	0.698389126319451
YER121W	10	-0.0939550477946598	0.000370954533988461	0.507526703105625
YER122C	10	0.0469404749207061	-0.0104665919430876	0.379785723787021
YER123W	10	0.0448402684728712	0.00278473958900836	0.402510670769888
YER124C	10	0.0252189300420359	0.00569916797833636	0.676600062939795
YER125W	10	0.00613169676595736	0.0026518520331988	0.72084206886321
YER126C	10	0.174817195555494	-0.00321090665269821	0.212266770775419
YER127W	10	0.15292722768421	-0.0341488383815671	0.422675853050078
YER128W	10	0.0861741474894961	-0.00330447612403045	0.459507823128204
YER129W	10	0.0431980105685625	0.0265020794276772	0.299582392382937
YER130C	10	-0.0556773441762014	0.00510748881771412	0.473005352222575
YER131W	10	-0.00162456445133265	-0.00626773123801196	0.968655231843668
YER132C	10	0.0383250490137181	0.00432072088922408	0.567615148126854
YER133W	10	0.0554994857836217	-0.000418584472070954	0.135646341461916
YER133W-A	10	-0.0589251840336381	0.00629241434112472	0.399888270987542
YER134C	10	-0.0573805496534555	-0.00612398071249155	0.366105084192451
YER135C	10	0.100984809016656	0.0289046285111724	0.462199372215519
YER136W	10	0.0423343257373329	0.0270828010811469	0.360548599912802
YER137C	10	0.0368297613012389	0.033469171289107	0.647801723167618
YER137W-A	10	0.120779322890678	0.0108540810850823	0.408179572874919
YER138W-A	10	0.069131217863181	0.0414907156338766	0.793762069531953
YER139C	10	0.0260593686435276	0.00145154343476174	0.553513133392684
YER140W	10	0.104932279604826	0.00985092402416353	0.194822634427389
YER141W	10	-0.0657169463974261	-0.0315072114274846	0.206144745723756
YER142C	10	-0.0229662995352711	0.00624147573909281	0.830916361994173
YER143W	10	0.0538470198272538	0.0364062908274428	0.398709226696282
YER144C	10	-0.0540991439212582	0.027072345866557	0.529130488529827
YER145C	10	0.189223944917734	-0.0862503705085578	0.378233780916534
YER145C-A	10	-0.0435117110024677	-0.0171572291622796	0.364149237368438
YER146W	10	-0.0363535374627355	-0.000111326298828533	0.388594225584318
YER147C	10	0.159504762194205	0.109280511124333	0.0988445578668283
YER147C-A	10	0.135001128843906	0.0736871040899663	0.0857820819993234
YER148W	10	0.108474284575617	-4.24638117868482e-06	0.174424994840232
YER148W-A	10	0.395240629749993	0.427320082624359	0.102634064127004
YER149C	10	0.145401014570973	0.0516240204936805	0.131523429134379
YER150W	10	-0.229960451640509	-1.06461631146581e-05	0.526379441459366
YER151C	10	0.12618944103341	0.0811382196829047	0.0362815203343505
YER152C	10	0.0624673701104832	0.0778293533823296	0.0577558148897909
YER152W-A	10	-8.62812218276679e-05	0.030451922092364	0.998794309728006
YER153C	10	0.142209069430611	0.0857188908664269	0.0619458936115004
YER154W	10	0.0565417870619556	0.0126115267981645	0.167961909445959
YER155C	10	0.200825591620767	0.184093310368606	0.0244699425694747
YER156C	10	0.105903083628451	0.0268494609198672	0.178834133443825
YER157W	10	0.148334028363607	0.10641559257455	0.0244147239949474
YER158C	10	-0.087825525991312	-0.0201747450797428	0.457928172296912
YER158W-A	10	0.0862591043046566	0.0815642897739727	0.278851545959499
YER159C	10	-0.0545885504521735	-0.0503086212927032	0.301461409055552
YER161C	10	-0.0124600186159055	0.0374703381720554	0.79170465457729
YER162C	10	0.0363919639168625	0.0309025469566443	0.365484635553436
YER163C	10	-0.00773591424738816	0.0115025114849186	0.89465362516475
YER164W	10	0.081478650674225	0.0916382092120892	0.123058746574611
YER165C-A	10	0.0544158939475463	0.0582767955075211	0.468762221449165
YER165W	10	-0.0686577272361109	-0.0775874616650391	0.019640538092324
YER166W	10	0.0469209034939483	0.0474621211994848	0.192930985674296
YER167W	10	0.0447457519887165	0.0582998874911787	0.0878494865420312
YER168C	10	0.13847229280304	0.0541558430034852	0.112676879273164
YER169W	10	0.148583614520464	0.16891465158418	0.00717880731631565
YER170W	10	-0.00704235005339992	-0.00180057302531069	0.846370122063306
YER171W	10	0.158153121984249	0.0690139150352003	0.137092508804524
YER172C	10	0.230447365508795	0.232959833975855	0.0130094530621859
YER172C-A	10	-0.0735107399508284	-0.0552430415037323	0.694588558633936
YER173W	10	0.18013022671016	0.100875191305843	0.0957882509785561
YER174C	10	-0.149549082369333	-0.151463252148677	0.0111200975841038
YER175C	10	-0.171533710243222	-0.0298080942213117	0.0989626622565622
YER175W-A	10	0.479656252054112	0.678998411389993	0.0577743062101188
YER176W	10	0.152478399080267	0.105033874537324	0.0531749788861696
YER177W	10	-0.0230696030617753	-0.00906119995082966	0.709908018290113
YER178W	10	-0.0373329094605008	-0.0358597225002974	0.232145135436747
YER179W	10	-0.16459730087493	-0.159840732022744	0.0631375234566259
YER180C	10	0.190223666644717	0.192434236561218	0.0171293762022736
YER180C-A	10	0.0703241348857953	0.0378471356015979	0.226654311793966
YER181C	10	0.184298671945211	0.274499849537235	0.364274617722833
YER182W	10	-0.0192981213229595	0.0214981335784626	0.76848204103796
YER183C	10	0.0647412324223732	0.0212231762426105	0.206310715062504
YER184C	10	-0.0449040131076053	-0.0109875372326071	0.739104039797695
YER185W	10	0.186807553619664	0.268889582305908	0.0129127972450596
YER186C	10	0.0151242776388601	0.000801332112637265	0.477263859433764
YER187W	10	0.0559844742877732	0.0190839602896486	0.368024703488234
YER188C-A	10	0.0421687528194975	0.00409729924954704	0.681092703105258
YER188W	10	-0.0030488486364668	0.0138417748427894	0.980116629853404
YER189W	10	0.0690278781248245	0.00510836064569696	0.624347012133269
YER190C-A	10	0.0629702272276926	0.0431619104284667	0.748642178176465
YER190W	10	0.00578689940782338	0.030293456729709	0.973873432255782
YFL001W	10	0.141512773311525	0.0611387209116348	0.1148400283026
YFL002C	10	0.113276166222726	0.0293197311555474	0.200269975083364
YFL003C	10	-0.0300602222055571	0.0101017182433308	0.704978435876563
YFL004W	10	0.0554368814248268	0.0524154790429813	0.285395526281316
YFL005W	10	-0.00483652439284971	0.0212885490280692	0.881437001569347
YFL007W	10	0.164061357621958	0.117217590407261	0.137808329734429
YFL008W	10	0.130180708047887	0.0543169890867934	0.209258101968373
YFL009W	10	0.0599679003279326	0.0169105881708898	0.257433311278704
YFL010C	10	-0.0216769175105925	-0.0414607879173284	0.509469487597104
YFL010W-A	10	-0.0537450734190247	-0.0226545722728357	0.306759679706135
YFL011W	10	-0.0352261969569176	-0.0198351174733301	0.630324725484232
YFL012W	10	0.116122067286515	0.0929118810110471	0.279671396375726
YFL012W-A	10	0.243079669989601	0.259995970015078	0.182487834474699
YFL013C	10	0.0610699558138435	0.0656764702477322	0.149555103599523
YFL013W-A	10	-0.0386493130347102	-0.0609565040145405	0.42792031089991
YFL014W	10	-0.257917060640902	-0.0473029975378869	0.471887491138359
YFL015C	10	0.0334603989424845	0.0163860604059477	0.698578187903083
YFL015W-A	10	-0.315582171061987	-6.3073733039984e-05	0.147427917714467
YFL016C	10	-0.0423523767804912	0.0146353153447099	0.626609249134503
YFL017C	10	0.0027943971130545	-0.0292801074050283	0.925015385996089
YFL017W-A	10	-0.0281486226010137	-0.0869083178610163	0.652770006176727
YFL018C	10	-0.0110216756649211	0.0129040448093324	0.769218983277389
YFL019C	10	-0.312656604033778	-0.0685963399496736	0.22778688231033
YFL020C	10	-0.0872679386519513	-0.0184097037517925	0.476073817027027
YFL021C-A	10	0.0311744542130535	-0.0129383797407061	0.711449101324518
YFL021W	10	-0.0437755297760816	-0.204603419455422	0.725656212274681
YFL022C	10	0.0208942644757971	0.00174048568961611	0.742844046248722
YFL023W	10	0.100217713250133	-0.0672992741206581	0.466917056553457
YFL024C	10	0.0476050315927627	-0.0183963614395054	0.467659398808617
YFL025C	10	0.155098170829296	0.0105788180893489	0.166249628229427
YFL026W	10	0.189423887198287	-0.000142323176366756	0.214349390648932
YFL027C	10	0.111853177686143	0.026313281459287	0.129936890779703
YFL028C	10	0.0593097671572393	-2.52907222660862e-05	0.392980334313113
YFL029C	10	0.0160904007497562	0.024549160836952	0.747592184891294
YFL030W	10	0.00130793308973144	0.0275698459988116	0.976097574055388
YFL031C-A	10	-0.00579657353822426	0.0309489431804134	0.927100807592548
YFL031W	10	-0.0583814866843244	0.0085493754587999	0.408533976633662
YFL032W	10	-0.0797145231974749	-0.00169982244419947	0.636170480362746
YFL033C	10	-0.00867417772842335	-0.00629851281304292	0.643405079622342
YFL034C-A	10	0.0732188267799202	0.000137432298112992	0.460065342810105
YFL034C-B	10	0.0264070629856778	0.013567760670202	0.52845667477782
YFL034W	10	0.0505262535703486	0.0390327704749193	0.331921113821535
YFL036W	10	0.0340007051863192	-3.77644105398873e-07	0.329247174761543
YFL037W	10	-0.0242847538256553	-0.0156596300086389	0.400979159855538
YFL038C	10	0.0407052568244495	-0.00562943589686811	0.322424441004828
YFL039C	10	0.0109070826086383	0.00853841898897726	0.597136356394503
YFL040W	10	-0.00864617315098687	0.0518912263982837	0.884360051304592
YFL041W	10	0.0585794621186109	0.0014237699385418	0.280038669450887
YFL041W-A	10	0.000272941131332557	0.0126955675991353	0.997537810413587
YFL042C	10	-0.0234662952246661	0.0325130610785637	0.789133524317321
YFL044C	10	0.0285235050185208	0.0507388183645371	0.773421020883034
YFL045C	10	0.0648299863447441	-0.00105840102425455	0.236289009367373
YFL046W	10	-0.0135886419323781	0.00439799718302163	0.567792116231641
YFL047W	10	0.0412778006718289	-0.0212703400327564	0.561661853052634
YFL048C	10	0.0216339668540074	-0.0449168860837422	0.709856272425838
YFL049W	10	0.059197270680299	0.0338414033423908	0.121312655143337
YFL050C	10	0.0673596887472713	0.0210566172732406	0.20393544650166
YFL051C	10	-0.0239722555740465	-0.023360361434394	0.670309051807798
YFL052W	10	0.0186469700296744	0.0514979076219067	0.822868019743512
YFL053W	10	0.00969969857140146	-0.0101510163787505	0.809159146143876
YFL054C	10	0.00849628125402508	0.0450339114166602	0.915083129688553
YFL055W	10	0.0888688563374556	0.0450870464676096	0.0927353546384658
YFL058W	10	0.137628441072121	-0.0256144058652439	0.187689756640704
YFL059W	10	-0.28524062603717	-0.274154546098032	0.028346359515225
YFL060C	10	-0.134417432374513	-0.0126913728535177	0.135257162859766
YFL061W	10	0.000402515733483433	0.0019055094269202	0.993444466215815
YFL062W	10	-0.19038899605506	-0.111570297598162	0.123444635272189
YFL063W	10	-0.0529927385319345	-0.100227240794101	0.743645303958772
YFL064C	10	-0.0288075367077799	0.129350004838697	0.936564512648105
YFL065C	10	-0.552724191751695	-0.000135081421747273	0.335494733679427
YFL066C	10	-0.116707036492668	-0.050338407615754	0.387392534860509
YFL067W	10	-0.132310387717517	0.0139517707696495	0.585840079337307
YFL068W	10	-0.515772162844679	0.0277300996622341	0.351756318218928
YFR001W	10	0.205350250599157	0.0676731416402233	0.108770723127858
YFR002W	10	0.126059854635204	0.0506466627894292	0.145421666452213
YFR003C	10	-0.0730951493586654	-0.00803341172058078	0.313784174743089
YFR004W	10	0.203978758137631	0.203509634864845	0.00382674427216954
YFR005C	10	0.178410227787619	0.115394892998833	0.0570663333023458
YFR006W	10	0.0390320398467413	0.0180377018397265	0.300160737360129
YFR007W	10	0.0106302566111559	-0.0010908022343288	0.771812729486421
YFR008W	10	-0.00364957623579649	-0.0110922198071244	0.950631763242074
YFR009W	10	0.0997651509745301	0.150855304327523	0.11154640224644
YFR009W-A	10	-0.49858618370248	-0.0926270134149387	0.207089164215933
YFR010W	10	0.0708068879452452	0.0430114549111907	0.104704104182431
[truncated: 4,339 more rows]

## Sheet: Table S4
ORF	N_FC_Strains	mean_FoldChangeExpression	median_FoldChangeExpression	p
YDL008W	4	-0.103794603978972	-0.279883760052509	0.489282440942401
YDL009C	4	-0.100589310999744	-0.0984535479711697	0.957256255225377
YDL010W	4	0.0426505847537367	0.0689993644344655	0.210756509636125
YDL011C	4	0.0127836109133965	0.0308615696526439	0.767354409801705
YDL012C	3	-0.0296233826113323	0.0479593959791799	0.369679827972884
YDL013W	3	-0.00402712534979531	-0.0159240833596678	0.369721134409108
YDL014W	5	0.137747620764231	0.047593358013036	0.369070683115667
YDL015C	5	0.117347533095507	0.158725781973919	0.0629087319470962
YDL016C	5	0.104739191704694	0.105102335556336	0.192862963354064
YDL017W	5	0.0399504407442815	0.0599060789571359	0.331148098051753
YDL018C	5	-0.0134326685841563	-0.000771126761513913	0.478149545496607
YDL019C	5	-0.0321904376273375	0.0750265441735063	0.956986334531387
YDL020C	5	0.0641898559328743	0.0704765566339279	0.307528109208833
YDL021W	3	0.45853658336019	0.398501881229922	0.831773397146231
YDR006C	3	0.118511746708522	0.141539373400705	0.0735535364403779
YDR007W	3	0.187879812183033	0.226227130950731	0.771520843622733
YDR008C	3	0.23561442261409	0.246576866825843	0.953771152441125
YDR009W	3	0.0959914648722144	0.0472655166364253	0.94439260595126
YDR010C	3	-0.0944671248576112	-0.13279946053791	0.259064627951007
YDR011W	3	0.115731514521578	0.110292260884865	0.0565772826740942
YDR012W	3	-0.159848771153077	-0.101777352502468	0.740934838659984
YDR013W	3	0.0218751432368925	-0.0122490447187777	0.0971986491068998
YDR014W	2	-0.264366052854525	-0.264366052854525	0.650809420062823
YDR496C	1	0.440689299903636	0.440689299903636	0.0107951732506558
YDR497C	1	-0.245083776561723	-0.245083776561723	0.060748148090885
YDR498C	1	-0.0454655347927134	-0.0454655347927134	0.995288832193121
YDR499W	1	0.113888659570473	0.113888659570473	0.0188680480763882
YDR500C	1	0.0944776321062634	0.0944776321062634	0.79425707220797
YDR501W	1	-0.0748633567445572	-0.0748633567445572	0.368872926141733
YDR502C	1	-0.759074983074091	-0.759074983074091	0.221405135323385
YDR503C	1	-0.260825044210096	-0.260825044210096	0.000170453186278786
YDR504C	1	-0.0225334248080675	-0.0225334248080675	0.563833744719072
YDR505C	2	0.133452831793814	0.133452831793814	0.289223530007268
YDR506C	2	-0.114874199849206	-0.114874199849206	0.12981882499833
YDR507C	5	-0.106115560762921	-0.11232301674694	0.893586765766101
YDR508C	5	-0.103332583089233	-0.144878238857839	0.177334705394291
YDR509W	5	0.855578013957309	0.614458010779308	0.00160095792080706
YDR510C-A	10	0.497432485191049	0.384366814284325	0.0673797163161189
YDR510W	10	-0.121693173829128	-0.141312249696625	0.00148305646989682
YDR511W	10	0.0235687123896673	0.0335685426462558	0.715818138162881
YDR512C	10	-0.123476876754924	-0.170906014148046	0.0929129205236408
YDR513W	10	0.129107718671701	0.176078507215806	0.194593555294087
YDR514C	10	0.181004332735415	0.0171408759690966	0.179299191440705
YDR515W	10	0.508051651232533	0.43941912635653	0.000184443467777702
YDR516C	10	-0.0489590406516173	0.129632388537808	0.85220382930548
YDR517W	10	-0.223037342605973	-0.230664169481291	0.000523718739586739
YDR518W	10	-0.203190899528864	-0.232961985689894	0.00337026454486044
YDR519W	10	-0.288402904866511	-0.284516830298928	1.20276953758483e-05
YDR520C	10	0.215024610296572	0.107079431140422	0.0293762389138141
YDR521W	10	-0.492889517013979	-0.533516368315262	0.00018664248826225
YDR522C	10	0.41510602163123	0.390969602307385	0.00691360301549465
YDR523C	10	0.745085012995289	0.692786941068619	0.0012078751079473
YDR524C	10	0.542435171352411	0.509354276344222	6.93413865571301e-05
YDR524C-A	10	-1.51670545605523	-1.4609355358039	0.00209472943370141
YDR524C-B	10	0.00280966004911899	-0.0299815263448757	0.973085211573022
YDR524W-C	10	0.895000874053033	0.365806730034735	0.057918906729811
YDR525W	10	0.317265206895572	0.301515977269956	0.0211516794752963
YDR525W-A	10	0.21266211618647	0.357982722116284	0.258694702857057
YDR526C	10	0.122829234939803	0.129286000960104	0.115784682246237
YDR527W	10	0.168060780698947	0.0689165749865221	0.0857850155486406
YDR528W	10	-0.144737307854118	-0.311753454723059	0.379792377832377
YDR529C	10	0.37597637882176	0.343364020644472	0.00118780926514824
YDR530C	10	-0.0395549887819579	0.010664089949795	0.47691260096744
YDR531W	10	0.134379048652286	0.185560724319831	0.158563263725248
YDR532C	10	0.1706492158811	0.203446658678657	0.00303925239056655
YDR533C	10	0.134327007057493	-0.124277115661547	0.686807107978028
YDR534C	10	0.411176108057889	0.40289673540735	0.0001958700370724
YDR535C	10	0.161849608283253	0.244300376638335	0.155548015256676
YDR536W	10	0.440022520106182	0.346849158389791	0.000464763459745777
YDR537C	10	-0.122293206809798	-0.164435819373598	0.100004690802859
YDR538W	10	0.161199129380199	0.124339876836761	0.00124418553534681
YDR539W	10	0.0512552619841599	0.0501584100647336	0.237253894168056
YDR540C	10	NaN	NaN	NaN
YDR541C	10	NaN	NaN	NaN
YDR542W	10	NaN	NaN	NaN
YDR543C	10	NaN	NaN	NaN
YDR544C	10	NaN	NaN	NaN
YDR545C-A	10	NaN	NaN	NaN
YDR545W	10	NaN	NaN	NaN
YLR431C	1	-0.161811630664808	-0.161811630664808	0.303106803200281
YLR432W	1	0.0409863464390615	0.0409863464390615	0.473666422114178
YLR433C	1	-0.0685424301451009	-0.0685424301451009	0.516999603433454
YLR434C	1	-0.333033426588968	-0.333033426588968	0.717474159044078
YLR435W	1	0.0412858629541328	0.0412858629541328	0.302017628157207
YLR436C	2	-0.0953813460492517	-0.0953813460492517	0.211302807858682
YLR437C	2	-0.24257800648309	-0.24257800648309	0.305823005862792
YLR437C-A	2	-0.421421101262089	-0.421421101262089	0.313911189135199
YLR438C-A	2	0.110719668287642	0.110719668287642	0.833560415749908
YLR438W	2	-0.168277440420095	-0.168277440420095	0.716689516116397
YLR439W	2	-0.0977681887920789	-0.0977681887920789	0.628509403670831
YLR440C	2	-0.057214983530503	-0.057214983530503	0.753491586824461
YLR441C	2	0.0159769518696458	0.0159769518696458	0.890541869294705
YLR442C	2	0.0397069028560656	0.0397069028560656	0.730303608503776
YLR443W	2	-0.0858085801013986	-0.0858085801013986	0.545425026143821
YLR444C	2	-0.0238770177225935	-0.0238770177225935	0.227839108375105
YLR445W	2	-0.714711785312137	-0.714711785312137	0.620552862840483
YLR446W	2	-0.136634671355555	-0.136634671355555	0.672534770396241
YLR447C	2	0.0193383625246559	0.0193383625246559	0.87429841143294
YLR448W	2	-0.0834054830156181	-0.0834054830156181	0.29169471173046
YLR449W	2	-0.140329612142471	-0.140329612142471	0.660550401399556
YLR450W	2	0.00287884623476011	0.00287884623476011	0.353818626657141
YLR451W	2	0.101022983532066	0.101022983532066	0.0922168347569269
YLR452C	2	-0.17593942736734	-0.17593942736734	0.579209846971819
YLR453C	2	-0.313589536558711	-0.313589536558711	0.793379208861714
YLR454W	2	0.0648267102508033	0.0648267102508033	0.909621741977757
YLR455W	2	-0.0323645717269358	-0.0323645717269358	0.878142744913485
YLR456W	2	-0.169394545128925	-0.169394545128925	0.86623197109093
YLR457C	2	0.105096018796492	0.105096018796492	0.203581531612611
YLR458W	2	0.489936163631784	0.489936163631784	0.949313375581475
YLR459W	2	0.063309214984054	0.063309214984054	0.644286330459226
YLR460C	2	NaN	NaN	0.112095436370212
YLR461W	2	NaN	NaN	0.441997287627403
YLR462W	2	NaN	NaN	0.151593880088105
YLR463C	2	NaN	NaN	0.849472556393244
YLR464W	2	NaN	NaN	NaN
YLR465C	2	NaN	NaN	0.743558361550256
YLR466C-A	2	NaN	NaN	0.685666657322576
YLR466C-B	2	NaN	NaN	0.589484304641125
YLR466W	2	NaN	NaN	0.670032988335925
YLR467C-A	2	NaN	NaN	0.685666657322576
YLR467W	2	NaN	NaN	0.863543198856379
YOR369C	8	-0.0488657931389336	-0.0757772887930989	0.396270711490588
YOR370C	8	0.0260863776027513	-0.00654535411388012	0.685985611499187
YOR371C	8	0.12440862760078	0.0940626038366887	0.0865977597999753
YOR372C	8	0.189343812163	0.154469734010503	0.0188071521282561
YOR373W	8	0.180538732726598	0.07950281223975	0.134676739172429
YOR374W	8	0.366990233522409	0.463935536358672	0.0434627574793873
YOR375C	8	-0.18497208536471	-0.195517892601423	0.334621900850421
YOR376W	8	0.443703782948686	0.499284486551834	0.00171281633198308
YOR376W-A	8	-0.0683696389622691	-0.124432466982456	0.508027672814628
YOR377W	8	0.00145102414006148	-0.0748256844602058	0.816684415560727
YOR378W	8	0.419713349735358	0.367747164748141	0.00100518285312615
YOR379C	8	0.606156036642699	0.843412093460961	0.0246643710474191
YOR380W	8	0.104097465812268	0.0870025255346722	0.00543689657948406
YOR381W	8	0.370538902623632	0.34585999298291	0.000311292658751053
YOR381W-A	8	0.437231799378531	0.428540977799044	0.0113036257356673
YOR382W	8	0.445441267620706	0.193674861213167	0.123832875101005
YOR383C	8	-0.0628742449698492	-0.159444286274724	0.930426415258594
YOR384W	8	-0.0520176130223135	0.0147006718441107	0.407468408169515
YOR385W	8	-0.0132476844274317	0.265739669368664	0.939250806987256
YOR386W	8	-0.347947532291325	-0.227856223349243	0.0839529519462434
YOR387C	8	NaN	NaN	0.617218995272095
YOR388C	8	NaN	NaN	0.5
YOR389W	8	NaN	NaN	0.5
YOR390W	8	NaN	NaN	0.629797420825002
YOR391C	8	NaN	NaN	0.5
YOR392W	8	NaN	NaN	0.5
YOR393W	8	NaN	NaN	0.5
YOR394C-A	8	NaN	NaN	0.5
YOR394W	8	NaN	NaN	0.927875708213189
YOR396C-A	8	NaN	NaN	0.5
YOR396W	8	NaN	NaN	0.5
YOL003C	7	0.339625281983965	0.339611734261017	0.0096010038720222
YOL004W	7	0.148050661984247	0.178560802221608	0.00446304937343645
YOL005C	7	0.05896438823523	0.0666428371941632	0.043533446781901
YOL006C	7	0.0360576281508942	-0.0421325653865892	0.948088308929467
YOL007C	7	0.197879537806481	-0.0658640868463267	0.354551248980306
YOL008W	7	0.266731304784752	0.223599507583933	0.00702045748904256
YOL009C	7	0.0776086700496292	0.00923853349111925	0.235290812273318
YOL010W	7	0.256352189407559	0.0402597374405385	0.420753448413079
YOL011W	7	0.263609630052212	0.273118100541277	0.00157635324336222
YOL012C	7	-0.0160049252938401	0.00951423151255656	0.471820299452407
YOL013C	7	-0.00268391712064866	0.0296910180810379	0.893640247773922
YOL013W-A	7	0.669796971208151	0.306154447978588	0.181114717815226
YOL013W-B	7	0.902798602662287	1.09050241875381	0.14034235237411
YOL014W	7	0.231046080462691	0.512543716344166	0.526162157173807
YOL015W	7	0.253992754007187	0.475453504016709	0.347258013745152
YOL016C	7	0.00546793948121308	0.432144262930457	0.831470141580729
YOL017W	7	0.155804779170566	0.00850673782596938	0.344934505520902
YOL018C	7	-0.020461343165415	-0.048556935425428	0.747471812556657
YOL019W	7	0.0875241344059182	-0.0277151782047935	0.308297737977753
YOL019W-A	7	2.11697138232166	2.25228848504337	0.00583635884648869
YOL020W	7	0.239310672865364	0.1567498937978	0.030810587234436
YOL021C	7	0.184964719041083	0.0260159323719426	0.227044536607361
YOL022C	7	0.277803520276936	0.247238585259631	0.0734714537921788
YOL023W	6	0.047271708292749	-0.000237631164556603	0.0914168054766883
YOL024W	6	0.136787557648277	-0.043070138697851	0.373614043254927
YOL025W	7	0.10727962676201	0.0663925874817966	0.0210572626259314
YOL026C	7	0.0768007926785176	0.0998741375343001	0.0359373557847194
YOL027C	7	0.00970896658882078	0.00906822223885781	0.837226843086552
YOR004W	5	0.621168277119268	0.350239061414825	0.0487736367405088
YOR005C	7	0.0268798932920455	0.0443399145741505	0.462360781082112
YOR006C	7	0.118925526027652	0.0394058095475259	0.451742988494829
YOR007C	7	0.269233257251537	0.328860777270886	0.0154867438224876
YOR008C	7	0.0137132629029	0.0239101660666195	0.560723241628232
YOR008C-A	7	0.996701781863688	1.12741390879124	0.0394849903315099
YOR008W-B	7	0.511501419810931	0.426929883379443	0.0288848401972468
YOR009W	7	0.415899678805648	0.306664908087565	0.0198298784495888
YOR010C	7	0.110775141120768	0.14236334898003	0.0888837191378754
YOR011W	7	0.319116598362541	0.223406578113969	0.0609060560956836
YOR011W-A	7	0.480115952810436	0.566786048270591	0.144590416681953
YOR012W	7	0.348282461910213	0.316381765476691	0.00489574461561285
YOR013W	7	0.110552797776016	0.115585606392317	0.0257228838762845
YOR014W	7	0.06395861786694	0.0119609657745132	0.28889270642166
YOR365C	4	0.206528033420692	0.182540020734201	0.0138019738133569
YOR366W	4	-0.27530390215422	-0.280892724569782	0.78327910178585
YOR367W	4	0.182722742501571	0.201080866741092	0.0134750752887492
YOR368W	4	0.118035299371118	0.0407803860572754	0.0305748557276551
YER165C-A	2	0.35978087508115	0.35978087508115	0.468762221449165
YER165W	1	-0.0420302827486967	-0.0420302827486967	0.019640538092324
YER166W	2	0.177314229666164	0.177314229666164	0.192930985674296
YER167W	4	0.089841105775228	0.110783569715704	0.0878494865420312
YER168C	4	0.354343916255666	0.300743903056296	0.112676879273164
YER169W	4	0.24748722284032	0.261385228531377	0.00717880731631565
YER170W	4	0.0369490835922849	0.0422613857239783	0.846370122063306
YER171W	4	0.423789554419882	0.340865268368836	0.137092508804524
YER172C	4	0.46287812347002	0.459090874662282	0.0130094530621859
YER172C-A	4	0.226788187005293	0.205333177678197	0.694588558633936
YER173W	4	0.417662563753471	0.330343690367983	0.0957882509785561
YER174C	4	-0.188147399416797	-0.174126414610742	0.0111200975841038
YER175C	4	-0.364001139986194	-0.32875333700984	0.0989626622565622
YER175W-A	4	1.05923437252004	1.01930679390335	0.0577743062101188
YER176W	4	0.364145054213469	0.365176616069379	0.0531749788861696
YER177W	4	-0.0902529842638394	-0.0138568496675322	0.709908018290113
YER178W	4	-0.0616022244662468	-0.0613306390493558	0.232145135436747
YER179W	4	-0.193291771148685	-0.282268908107865	0.0631375234566259
YER180C	4	0.359247753213717	0.340191097783467	0.0171293762022736
YER180C-A	4	0.160548112184733	0.207685650186402	0.226654311793966
YER181C	4	0.365387574238694	0.523033111507188	0.364274617722833
YER182W	4	-0.0595118217114484	0.0646274730360561	0.76848204103796
YER183C	4	0.114157216076631	0.132003612735711	0.206310715062504
YER184C	4	0.106665255593826	0.188584327019843	0.739104039797695
YER185W	4	0.318328968049908	0.326977174035972	0.0129127972450596
YER186C	4	NaN	NaN	0.477263859433764
YER187W	4	NaN	NaN	0.368024703488234
YER188C-A	4	NaN	NaN	0.681092703105258
YER188W	4	NaN	NaN	0.980116629853404
YER189W	4	NaN	NaN	0.624347012133269
YER190C-A	4	NaN	NaN	0.748642178176465
YER190W	4	NaN	NaN	0.973873432255782
YOL141W	6	0.717544725223454	0.448295650582573	0.0371658943416783
YOL142W	6	0.253186100634261	0.200774069767029	0.165188100396423
YOL143C	6	-0.36624618298954	-0.340077404513912	0.153616871059437
YOL144W	6	0.371140768882694	0.0797328486599593	0.145080988253768
YOL145C	6	0.146369294028078	0.086811800679342	0.178800356681784
YOL146W	6	0.254869474022658	0.253408977732606	0.106380035670081
YOL147C	6	0.224786709487333	0.158444357035138	0.0464472710811686
YOL148C	6	0.159125237687932	0.147496443675475	0.0303280613197405
YOL149W	6	0.367468544979825	0.299945990174318	0.0281264871751954
YOL150C	6	-0.727047432353821	-0.850181608744934	0.00999082395593717
YOL151W	6	-0.394957323612861	-0.511060602474508	0.106847457486632
YOL152W	6	0.172231125601044	0.0114397604579104	0.234778311825485
YOL154W	6	0.117818420552207	0.124665113854094	0.312462364097419
YOL155C	6	-0.199487193990088	-0.193483040114437	0.156669244739985
YOL155W-A	6	0.512410046259772	0.450581120552279	0.0904186669874302
YOL156W	6	0.304646211679724	0.217873365531292	0.0478607162003542
YOL157C	6	0.696124787020692	0.76228197005845	0.00260207877442427
YOL158C	6	0.842478982106257	0.856531722965516	0.00584445572146398
YOL159C	6	0.212298440048853	0.170950023674178	0.126772056262193
YOL159C-A	6	0.0922125451960136	0.0711771629153382	0.560882744621764
YOL160W	6	0.894424059438746	1.0509911757209	0.0605105313322201
YOL161C	6	0.594648213992784	0.349777453568888	0.0479875436627421
YOL162W	6	0.616990584848403	0.636641095390787	0.0102208068900232
YOL163W	6	0.666390796098483	0.677998382155344	0.00118681698855167
YOL164W	6	0.347654307640211	0.281762025055093	0.0383592561249969
YOL164W-A	6	NaN	NaN	0.210621695972538
YOL165C	6	NaN	NaN	0.888462553294016
YOL166C	6	NaN	NaN	0.5307324187898
YOL166W-A	6	NaN	NaN	NaN
YOR015W	6	0.0582239271240826	0.129714373407721	0.414321834355019
YOR016C	6	0.205355048001524	0.112281658984257	0.0498994054999591
YOR017W	6	0.143218559604812	0.150042170916021	0.0445899621346619
YOR018W	5	-0.058300585293488	0.00947752230640826	0.598491183973173
YEL001C	3	0.122359927060138	0.161861145023621	0.717081764537297
YEL002C	3	0.147624891217496	0.162382872634728	0.0243736939453808
YEL003W	3	0.205183048681296	0.232181547537904	0.517051512292156
YEL004W	3	0.33135297637361	0.298948870640196	0.0168815298180608
YEL005C	3	0.00340905867430948	0.132277944280954	0.800179474580843
YEL006W	3	0.224218643829052	0.206027001129721	0.25870482345341
YEL007W	3	0.142949445369819	0.14679227633945	0.39326228759427
YEL008C-A	3	0	0	NaN
YEL008W	3	0.118823883161041	0.205531305878621	0.455967163050935
YEL009C	3	0.0340833620898154	0.0386465523260903	0.468677655051274
YEL009C-A	3	-0.437809782589436	-0.272521147021322	0.245138260263976
YEL010W	3	-0.107757911755067	0.224818856574976	0.975412522652636
YEL011W	3	-0.943218422411063	-0.256080747588322	0.418718506771082
YEL012W	3	-0.223621332798939	-0.194905155331337	0.603596563046718
YEL013W	3	0.0288558008588119	-0.0376073822361762	0.614808590708296
YEL014C	3	0.488285107675116	0.559651709110768	0.0495355630345801
YEL015W	3	0.357141993244107	0.383557174439972	0.263640385665297
YEL016C	3	0.219318236014926	0.158261611143672	0.202883550885252
YEL017C-A	3	-0.131672244421267	-0.170539955168729	0.517621829608512
YEL017W	3	0.046072160505719	0.0138495941093187	0.629353936278309
YEL018C-A	3	0.310421582082225	0.306700663729199	0.59395897006313
YEL018W	3	0.185415732730678	0.236987316575899	0.265828274821595
YEL019C	3	0.407511359158481	0.459047388003355	0.120604377339478
YEL020C	3	0.0551422083966944	0.192684648554141	0.810314720079835
YEL020C-B	3	1.03254504162952	1.04839970869717	0.539928730112897
YEL020W-A	3	0.0584988011583328	0.0458644000315968	0.321083108140522
YEL021W	3	-0.107181854420308	0.158525586401212	0.212285155587679
YEL022W	3	0.419433183693751	0.59820585782502	0.191902627880827
YEL023C	3	0.301469054311532	0.272308282821719	0.149014910601683
YEL024W	3	-0.144072353184946	-0.231463074540431	0.884769166689822
YEL025C	3	0.0477258011272848	0.130877291047263	0.892250992872776
YEL026W	3	0.375813040618628	0.380105441715922	0.173177500689281
YEL027W	3	-0.175745970711112	-0.175943278388978	0.0375919807292567
YEL028W	3	0.241540149004247	0.262486694071129	0.239610694447607
YEL029C	3	0.479571030367866	0.627697395879356	0.0937119362541485
YEL030C-A	3	0.380146395566427	0.381629761230573	0.135178386590002
YEL030W	3	0.282605060471356	0.293243347093579	0.0407069591820782
YEL031W	3	0.323153222467013	0.453466583792021	0.299527513502441
YEL032C-A	3	0.989420406943103	0.694575727544032	0.609315098596199
YEL032W	3	0.492126764082071	0.525175968917885	0.223112956107018
YEL033W	3	0.496193086443871	0.444627682825537	0.0661242587211969
YEL034C-A	3	0.232525777427589	0.193340989606818	0.260089762594558
YEL034W	3	0	0	NaN
YEL035C	3	0.287831160968098	0.289413075518881	0.0360973512985217
YEL036C	3	0.297539901940636	0.314410062078992	0.313519213013401
YEL037C	3	0.226141011069424	0.228989036956964	0.132018899771349
YEL038W	3	0.272141284629265	0.372042363523203	0.0923531159669964
YEL039C	3	-1.12540184488508	-0.612342393789652	0.298546506886026
YEL040W	3	0.555614283138811	0.602398402119598	0.417744488360281
YEL041W	3	-0.0892117682773892	-0.188284747007403	0.88200664198044
YEL042W	3	0.188365799025221	0.153277670975566	0.306811228359758
YEL043W	3	0.188250876464913	0.210013435317409	0.0261104979004476
YEL044W	3	0.38758445464113	0.424208068789795	0.0892576651277918
YEL045C	3	0.865474648280365	0.773270341719395	0.0515364324104235
YEL046C	3	0.337787725058824	0.339063986227261	0.0753733111131067
YEL047C	3	-0.0730535118683403	-0.124554967893526	0.693456680144701
YEL048C	3	0.959553253498474	1.15087591594568	0.121361089233523
YEL049W	3	0.348815060789129	0.21739108627268	0.105883678628824
YEL050C	3	0.210620735505608	0.204364870389612	0.509814921610356
YEL050W-A	3	0.201452739718482	0.364001974492512	0.985014381421208
YEL051W	3	0.17294007059327	0.26620769606768	0.122348466141494
YEL052W	3	-0.135160024732614	-0.129218582608857	0.14634439040827
YEL053C	3	0.405472489815729	0.492893772478728	0.0332692382397797
YEL053W-A	3	0.0664642528742872	0.13189893418237	0.784813794338795
YEL054C	3	0.235691746579333	0.192242437139256	0.559620077583243
YEL055C	3	0.496997241638988	0.595844569845588	0.258653563524853
YEL056W	3	0.133665551087948	0.0824470009609469	0.595711149124411
YEL057C	3	0.241762200691888	0.245763758054243	0.286952450190632
YEL058W	3	0.10532825601716	0.110813599092794	0.887588474067486
YEL059C-A	3	-0.322655830508031	-0.428283503388028	0.918429012966241
YEL059W	3	0.113185975360943	-0.00897919081963943	0.366107087767457
YEL060C	3	-0.397820020820634	0.0168863905235686	0.616047806376003
YEL061C	3	0.348392636274757	0.335916666625516	0.239297095251548
YEL062W	3	0.0349932943114153	0.0230526655083517	0.716850929733865
YEL063C	3	0.246205561647282	0.240408789346268	0.19785244792708
YEL064C	3	0.489870358479862	0.538518163625173	0.0766181525706612
YEL065W	3	1.25000518729055	1.75551077734528	0.217701465260152
YEL066W	3	0.215420716896511	0.155927006817661	0.705622090951986
YEL067C	3	0.339925153595349	0.390342542703718	0.183820553913507
YEL068C	3	0.204106078926188	0.257714752171176	0.343362655606521
YEL069C	3	0.21140376849447	0.111914521905262	0.650738189641021
YEL070W	3	0.172221452292068	0.160811620843331	0.089368654399619
YEL071W	3	-0.0317114237136533	0.00393132609692268	0.91104868873391
YEL072W	3	0.41590121361298	0.566198856250424	0.127167612306532
YEL073C	3	-0.0643344219669382	-0.0643344219669382	0.95688540826842
YER001W	3	0.364727916805661	0.454768403833761	0.216647825560557
YER002W	3	0.546080160090373	0.573835665407152	0.102924523619536
YER003C	3	0.161030555723137	0.0845697559642532	0.501317396337584
YER004W	3	0.0462068086322674	0.0480413153540608	0.65343393274284
YER005W	3	0.217182025630417	0.19884639512736	0.570216987053044
YER006C-A	3	0.631158856156139	0.776872582753758	0.0340461738781368
YER006W	3	0.618309217461149	0.648971489107167	0.128853463775958
YER007C-A	3	0.442264712119722	0.57155717343222	0.0818227613762267
YER007W	3	0.583810305345522	0.712413596555308	0.01243610357192
YER008C	3	0.0664946859500238	-0.00412472905823329	0.172581791891105
YER009W	3	0.165800329268829	0.219449491274281	0.524432122633479
YER010C	3	0.230742037961271	0.21822010235683	0.264790140748961
YER011W	3	0.446253323084845	0.628388175781227	0.587826539742207
YER012W	3	0.21543570949821	0.191753034406013	0.178739372797164
YER013W	3	0.195011202454516	0.287467653301516	0.364984788014236
YER014C-A	3	0.355774263608685	0.417693161440776	0.0767803281001245
YER014W	3	0.0216437524006217	-0.020079759322295	0.576625358669123
YER015W	3	0.0184203485145831	0.0500828331229815	0.444902677370576
YER016W	3	0.15043334061684	0.0893676419400093	0.563764056844674
YER017C	3	0.149888061272224	0.189609248846801	0.266626152754275
YER018C	3	0.211068916895127	0.105086921120863	0.132467465266533
YER019C-A	3	0.0562157847351591	0.0380321377147732	0.68373182955851
YER019W	3	0.289317898810094	0.204661787111236	0.12560086373587
YER020W	3	-0.244509299130239	0.0886446986697805	0.786414940065496
YER021W	3	0.316437142098307	0.286060541888264	0.0363363379924791
YER022W	3	0.179636651405444	0.246473155499678	0.0624806257978092
YER023C-A	3	0	0	0.343230790422117
YER023W	3	0.218132663363253	0.331317730732813	0.612251511444665
YER024W	3	0.406730485803835	0.436654790948085	0.0624145709478611
YER025W	3	0.27036067073338	0.252392704825356	0.293346649362663
YER026C	3	0.378139297870133	0.506964596210125	0.257932454634499
YER027C	3	0.033369848452722	0.0348510668021512	0.830204189887801
YOL140W	5	-0.258245742705999	-0.44109227120557	0.0620209937269361
YOL001W	4	0.360580142211769	0.319976578903841	0.0114105243015396
YOL002C	4	0.224877351614043	0.220184742079995	0.600969519434596
YPL257W	1	0.0300484196771138	0.0300484196771138	0.318699437420801
YPL258C	2	-0.0153703605810625	-0.0153703605810625	0.207612395565858
YPL259C	2	0.201430972873513	0.201430972873513	0.298263208167149
YPL260W	2	0.0466171183232614	0.0466171183232614	0.787559603917503
YPL261C	2	0.0413053066517268	0.0413053066517268	0.137433580529888
YPL262W	2	-0.0342020781634175	-0.0342020781634175	0.879349314303381
YPL263C	2	-0.0381061998491755	-0.0381061998491755	0.53788434790205
YPL264C	2	-0.0454131765030914	-0.0454131765030914	0.69886048767502
YPL265W	2	0.0696718640990655	0.0696718640990655	0.459028487983297
YPL266W	2	0.0387840002726955	0.0387840002726955	0.331925938783283
YPL267W	2	-0.451048635208319	-0.451048635208319	0.911423027567274
YPL268W	2	0.0340769448471944	0.0340769448471944	0.2985258939562
YPL269W	2	0.0377261256179071	0.0377261256179071	0.132942679005521
YPL270W	2	0.125078637406732	0.125078637406732	0.107372433694003
YPL271W	2	-0.429455546386404	-0.429455546386404	0.494985174423472
YPL272C	2	-0.0783879516940703	-0.0783879516940703	0.368034007353939
YPL273W	2	0.090518456950741	0.090518456950741	0.179435144984758
YPL274W	2	0.0999196890081712	0.0999196890081712	0.344337616246016
YPL277C	2	NaN	NaN	0.532739416658334
YPL278C	2	NaN	NaN	0.58938390505264
YPL279C	2	NaN	NaN	0.839130245143832
YPL280W	2	NaN	NaN	0.829458709182028
YPL281C	2	NaN	NaN	0.444308604444029
YPL282C	2	NaN	NaN	0.870002200948887
YPL283C	2	NaN	NaN	0.869002592006022
YPL283W-A	2	NaN	NaN	0.128337347552184
YPL283W-B	2	NaN	NaN	0.159389221094364
YOL028C	3	0.336517291392581	0.336469804113164	0.308995484582348
YOL029C	3	0.201222129756793	0.188761057058373	0.357728278928355
YOL030W	2	0.0189235701983792	0.0189235701983792	0.0114089368577994
YOL031C	2	0.0206338731314532	0.0206338731314532	0.52164033447868
YOL032W	1	-0.174018493614275	-0.174018493614275	0.470289904003836
YOL033W	1	0.246803795276947	0.246803795276947	0.14298828658843
YOL130W	1	0.151019940831029	0.151019940831029	0.0337699892505118
YOL131W	1	0.326343319679656	0.326343319679656	0.0710602596090786
YOL132W	1	-0.335337330297858	-0.335337330297858	0.514380526359582
YOL133W	3	0.126815194727758	0.153767737184208	0.250141376887996
YOL134C	1	0.037765366868318	0.037765366868318	0.423780411321761
YOL135C	3	0.128584758847704	0.11387730975909	0.0327710237333952
YOL136C	3	0.289491852771863	0.381572785397883	0.0182942430684488
YOL137W	3	0.383957354697629	0.467557106650842	0.161192414112207
YOL138C	3	0.274944627356419	0.380322260621411	0.319149314766008
YOL139C	3	0.261301975725395	0.214254392035542	0.210087506726196
YPL005W	1	0.214356038459684	0.214356038459684	0.930289146935948
YPL006W	1	-0.106220091377487	-0.106220091377487	0.266515144286972
YPL007C	1	0.0659354894493508	0.0659354894493508	0.228210880545224
YPL008W	1	0.0819019834994336	0.0819019834994336	0.253733060421411
YPL009C	1	0.0283080176356322	0.0283080176356322	0.939407321041599
YPL010W	1	-0.2302489923918	-0.2302489923918	0.305713304475438
YPL011C	1	0.114814680980293	0.114814680980293	0.303685815262285
YPL012W	1	-0.0889020404034793	-0.0889020404034793	0.388928657037196
YPL013C	1	-0.0549524622627521	-0.0549524622627521	0.654168731388546
YPL014W	1	0.138467857349547	0.138467857349547	0.656031935853847
YPL015C	1	-0.0173439735060612	-0.0173439735060612	0.755545909695193
YPR003C	1	-0.0966068848340473	-0.0966068848340473	0.834721460212665
YPR004C	1	-0.00459874617244081	-0.00459874617244081	0.689813421102329
YPR005C	1	-0.166781571007986	-0.166781571007986	0.828710410678474
YPR006C	1	-0.295547194251415	-0.295547194251415	0.760087729111751
YPR007C	1	0.451143357953767	0.451143357953767	0.54420360634132
YPR008W	1	-0.0807809210278463	-0.0807809210278463	0.960348743774571
YPR009W	1	0.208696558322366	0.208696558322366	0.332333087888934
YPR010C	1	0.0402236151419405	0.0402236151419405	0.32537621570383
YPR010C-A	1	-1.08535197318421	-1.08535197318421	0.529667335434861
YPR011C	1	0.266624352936032	0.266624352936032	0.734115442346008
YPR012W	1	-0.50137868904491	-0.50137868904491	0.827389730283999
YPR013C	1	0.325099688320734	0.325099688320734	0.751776729551877
YPR014C	1	-0.0669017585430548	-0.0669017585430548	0.327098974562569
YPR015C	1	0.0313091138794269	0.0313091138794269	0.709741963917078
YPR016C	1	0.11604608650176	0.11604608650176	0.390720536998941
YPR016W-A	1	0.0339763742404597	0.0339763742404597	0.323956729521606
YPR017C	1	0.133218775251895	0.133218775251895	0.128051101934358
YPR018W	1	-0.10789385083562	-0.10789385083562	0.318450325525947
YEL074W	2	NaN	NaN	0.748960465067879
YEL075C	2	NaN	NaN	0.17861027415248
YEL075W-A	2	NaN	NaN	0.59672761233342
YEL076C	2	NaN	NaN	0.58039352214423
YEL076C-A	2	NaN	NaN	NaN
YEL077C	2	NaN	NaN	0.188144615488304
YEL077W-A	2	NaN	NaN	0.117562384072196
YER028C	2	0.478078402347429	0.478078402347429	0.137791145610297
YER029C	2	0.265707968875761	0.265707968875761	0.186277771686815
YER030W	2	0.156149091482753	0.156149091482753	0.949694346915244
YER031C	1	0.239479010848807	0.239479010848807	0.249593078918208
YER032W	1	0.448731684902417	0.448731684902417	0.154222674189416
YGL007C-A	1	0.892342750654002	0.892342750654002	0.635705566233818
YGL008C	1	-0.0146960773440773	-0.0146960773440773	0.326068805927929
YGL009C	1	-0.153037136019096	-0.153037136019096	0.92675279025299
YGL010W	1	0.324868797567804	0.324868797567804	0.309365741245706
YGL011C	1	0.421502503382081	0.421502503382081	0.562420668060771
YGL012W	1	0.0525733552594701	0.0525733552594701	0.991828071169934
YGL013C	1	0.516569917133824	0.516569917133824	0.174500185057569
YGR009C	1	0.0885272321909475	0.0885272321909475	0.816151897409387
YGR010W	1	0.17130550908623	0.17130550908623	0.918043555685328
YGR011W	1	0.20511634090873	0.20511634090873	0.178444456367381
YGR012W	1	0.197408523390818	0.197408523390818	0.770361949490736
YGR013W	1	0.153808907053758	0.153808907053758	0.816956780906162
YGR014W	1	0.691603124834346	0.691603124834346	0.293122284490999
YGR274C	2	0.463463471114934	0.463463471114934	0.0870817041121078
YGR275W	2	0.0193112821666308	0.0193112821666308	0.400052528908924
YGR276C	2	0.487818615901141	0.487818615901141	0.303714415430461
YGR277C	2	0.236226501832782	0.236226501832782	0.934214865821268
YGR278W	2	0.39027424825903	0.39027424825903	0.0703220028126752
YGR279C	2	-0.558329653058	-0.558329653058	0.0972428651212195
YGR280C	2	0.627862047608853	0.627862047608853	0.246768237776034
YGR281W	2	-0.0483306666074605	-0.0483306666074605	0.235159779166184
YGR282C	2	0.147510286889345	0.147510286889345	0.0225214645722105
YGR283C	2	0.914455299477708	0.914455299477708	0.221778816242217
YGR284C	2	0.110409987377094	0.110409987377094	0.831529933866272
YGR285C	2	0.268939112901119	0.268939112901119	0.591727976993215
YGR286C	2	0.889380513209793	0.889380513209793	0.671854308639017
YGR287C	2	0.198644335349167	0.198644335349167	0.990180252429842
YGR288W	2	-0.0056259239271976	-0.0056259239271976	0.544031495160506
YGR289C	2	0.722923208483533	0.722923208483533	0.144327833865829
YGR290W	2	-5.53424995996662	-5.53424995996662	0.156425402670089
YGR291C	2	-3.74340832919107	-3.74340832919107	0.386603932757184
YGR292W	2	-4.22495093502428	-4.22495093502428	0.188562178397958
YGR293C	2	-3.58892326792432	-3.58892326792432	0.283271803030768
YGR294W	2	-5.32506614802212	-5.32506614802212	0.143902989365582
YGR295C	2	-9.10531307580545	-9.10531307580545	0.176477912579473
YGR296C-A	2	-0.00371069047394701	-0.00371069047394701	0.370754372753992
YGR296C-B	2	0	0	0.0757204268694332
YGR296W	2	1.34930035687942	1.34930035687942	0.274295353826455
